# Supplementary material
Source: PubMed Central journal article supplement (PMC3345084)
Supplement: NIHMS372639-supplement-1_si_001.pdf [file NIHMS372639-supplement-1_si_001.pdf]

## Supporting Information

### Nitrosation of Aryl and Heteroaryltrifluoroborates with Nitrosonium Tetrafluoroborate

Gary A. Molander\* and Livia N. Cavalcanti

*Roy and Diana Vagelos Laboratories, Department of Chemistry, University of Pennsylvania, 231 South 34th Street, Philadelphia, Pennsylvania 19104-6323.*

#### Table of Contents

|                              |     |
|------------------------------|-----|
| General Considerations ..... | S-1 |
| NMR Spectras .....           | S-2 |

**General Considerations:** Nitrosonium tetrafluoroborate and HPLC grade acetonitrile, dichloromethane, hexanes and ethyl acetate were used as received. All new compounds were characterized by  $^1\text{H}$ ,  $^{13}\text{C}$  and  $^{19}\text{F}$  (when applicable) NMR, IR spectroscopy, high resolution mass spectrometry (HRMS) and melting point determination (for solids). All known compounds were characterized by  $^1\text{H}$  and  $^{13}\text{C}$  NMR and compared to literature values.  $^1\text{H}$ ,  $^{13}\text{C}$  and  $^{19}\text{F}$  spectra were recorded at 500.4, 125.8, and 470.8 MHz, respectively. Melting points ( $^{\circ}\text{C}$ ) are uncorrected.  $^{19}\text{F}$  NMR chemical shifts were referenced to external  $\text{CFCl}_3$  (0.0 ppm). HRMS (CI) data were obtained in Pos mode, using methane as the ionizing gas. HRMS (ESI) data were obtained in Pos or Neg mode. All reactions were carried out in an open to air atmosphere.

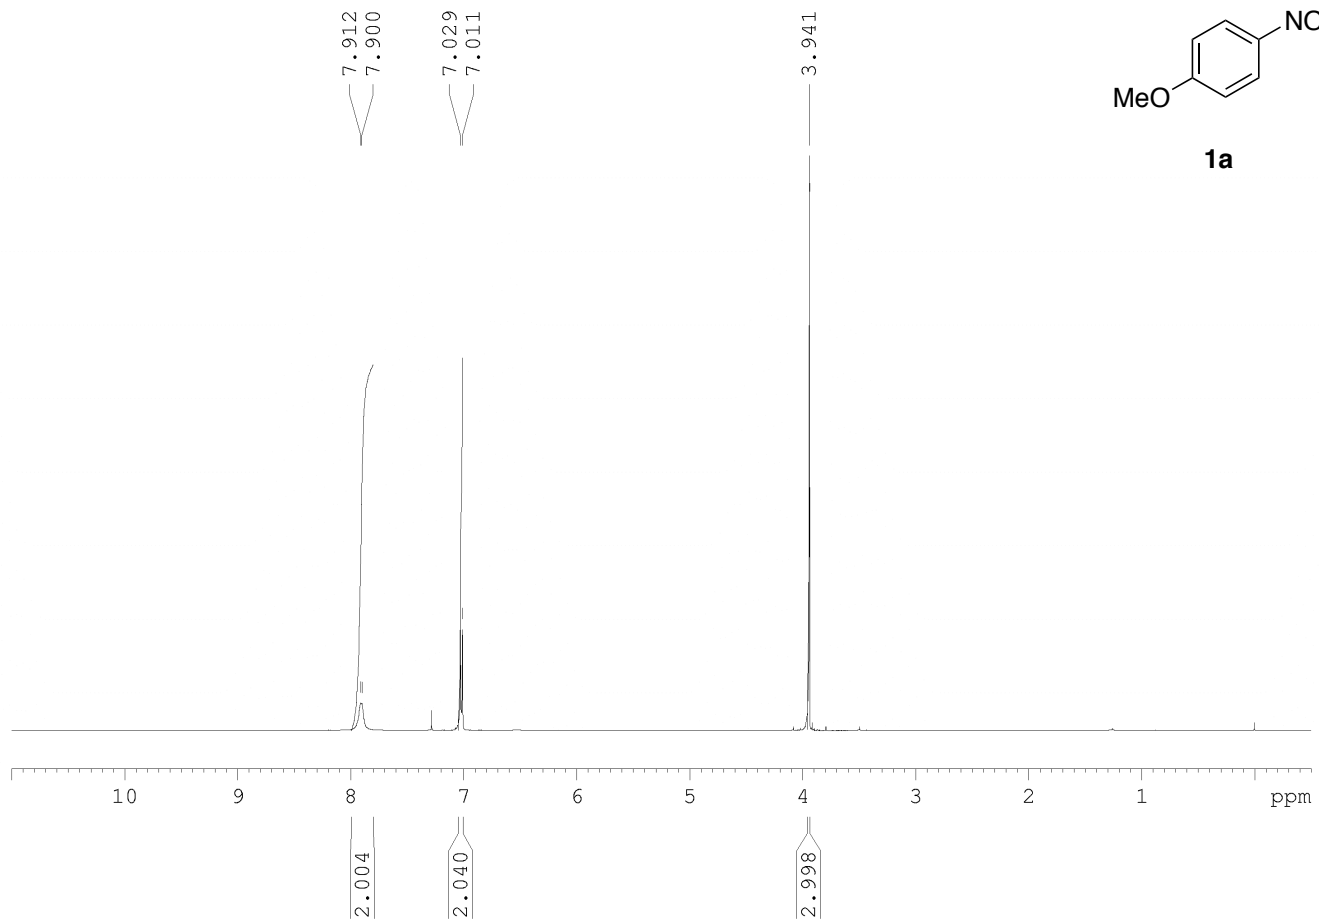

$^1\text{H}$  NMR (500 MHz,  $\text{CDCl}_3$ ) Spectrum of 1-methoxy-4-nitrosobenzene (1a)

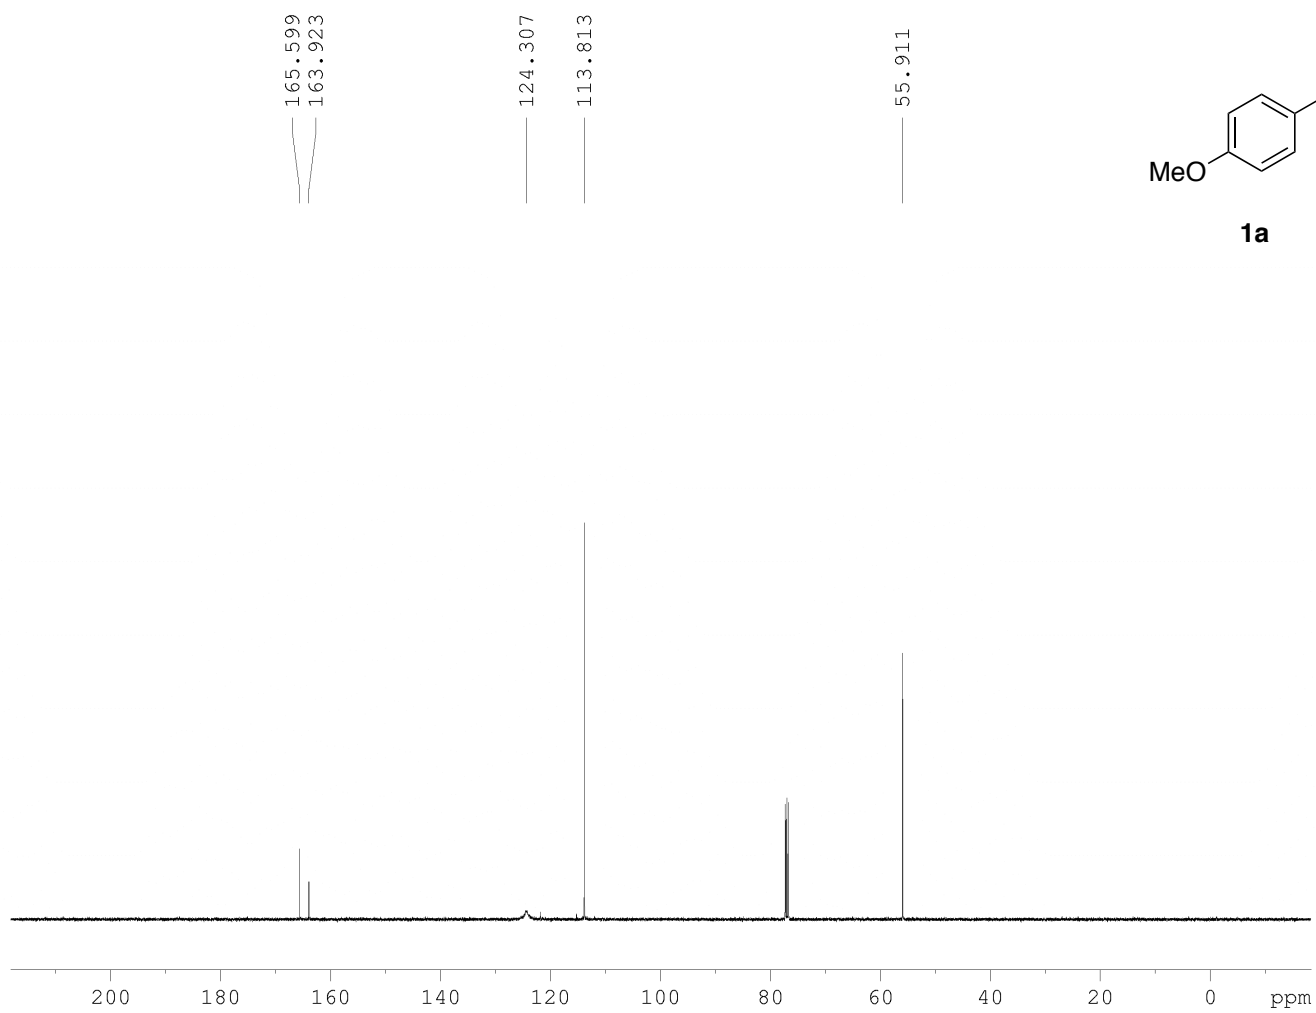

<sup>13</sup>C NMR (128.5 MHz, CDCl<sub>3</sub>) Spectrum of 1-methoxy-4-nitrosobenzene (1a)

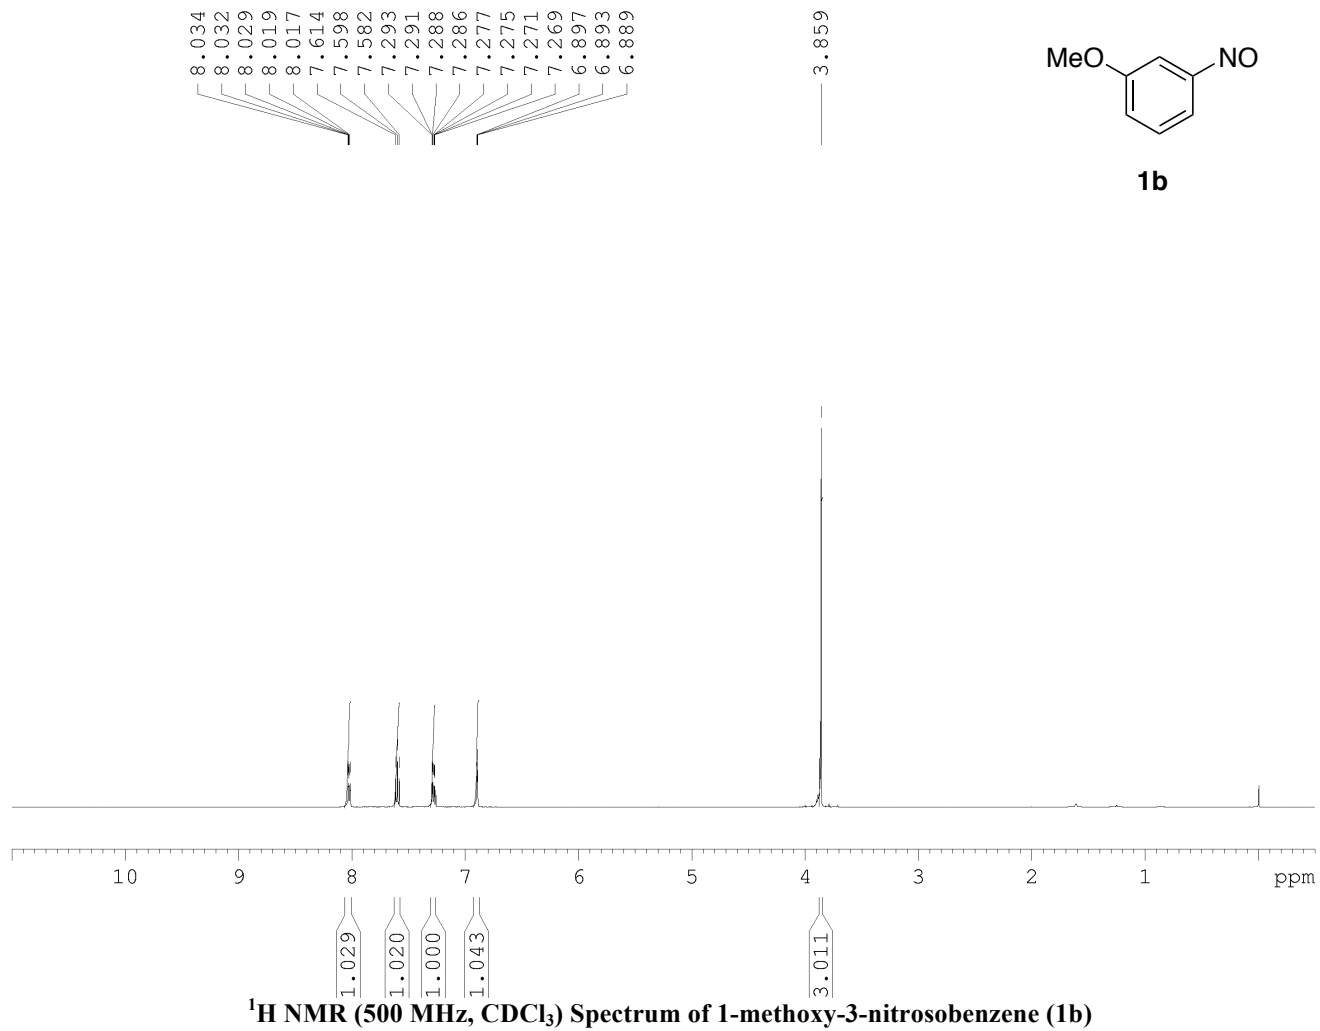



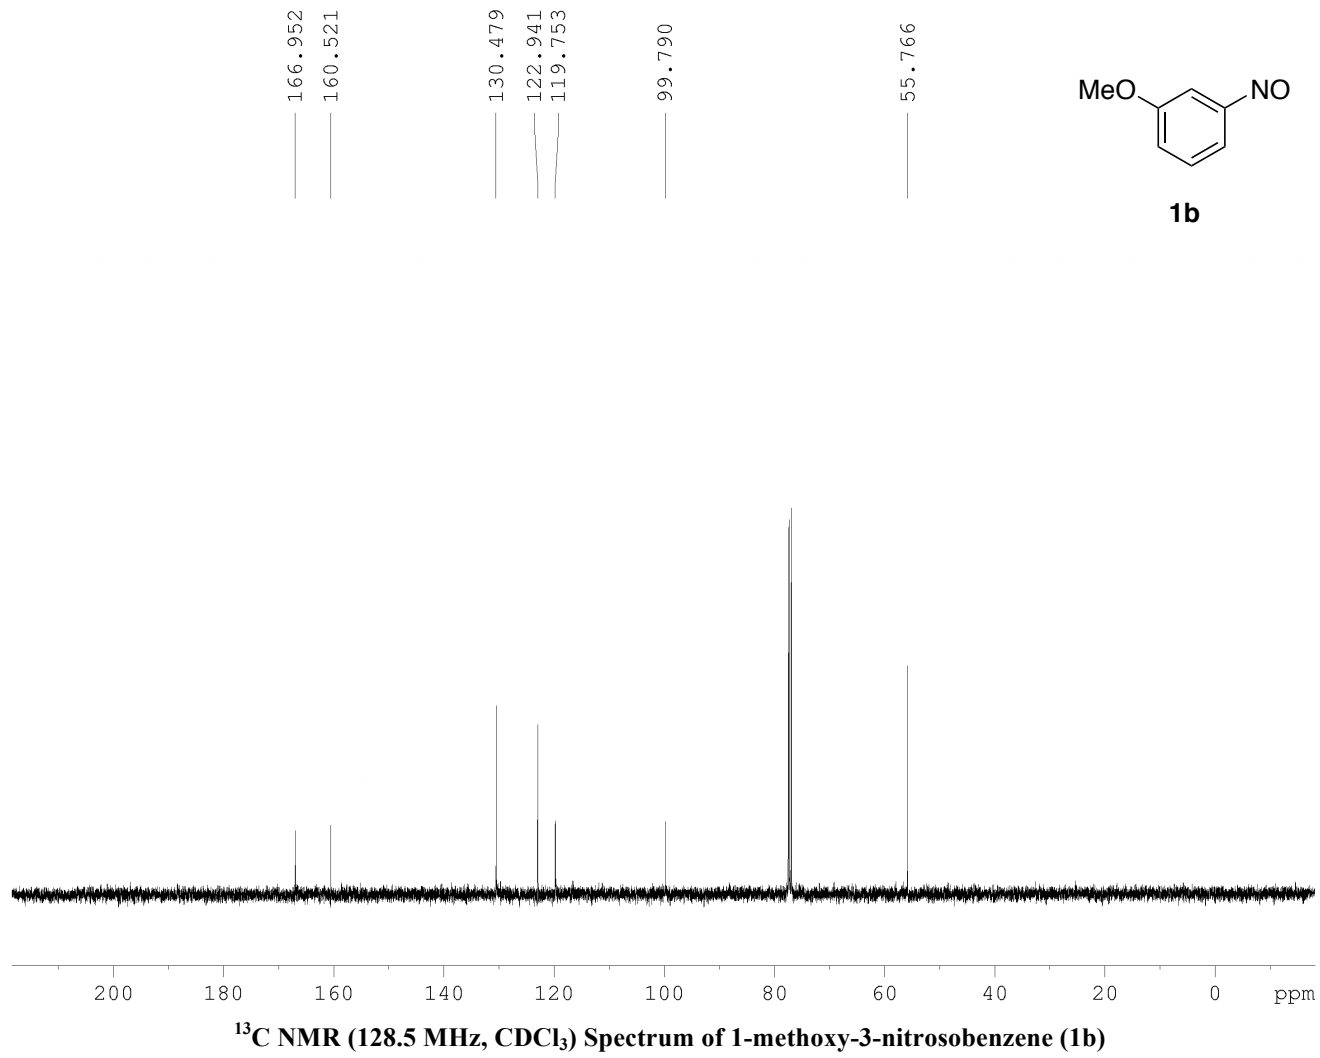

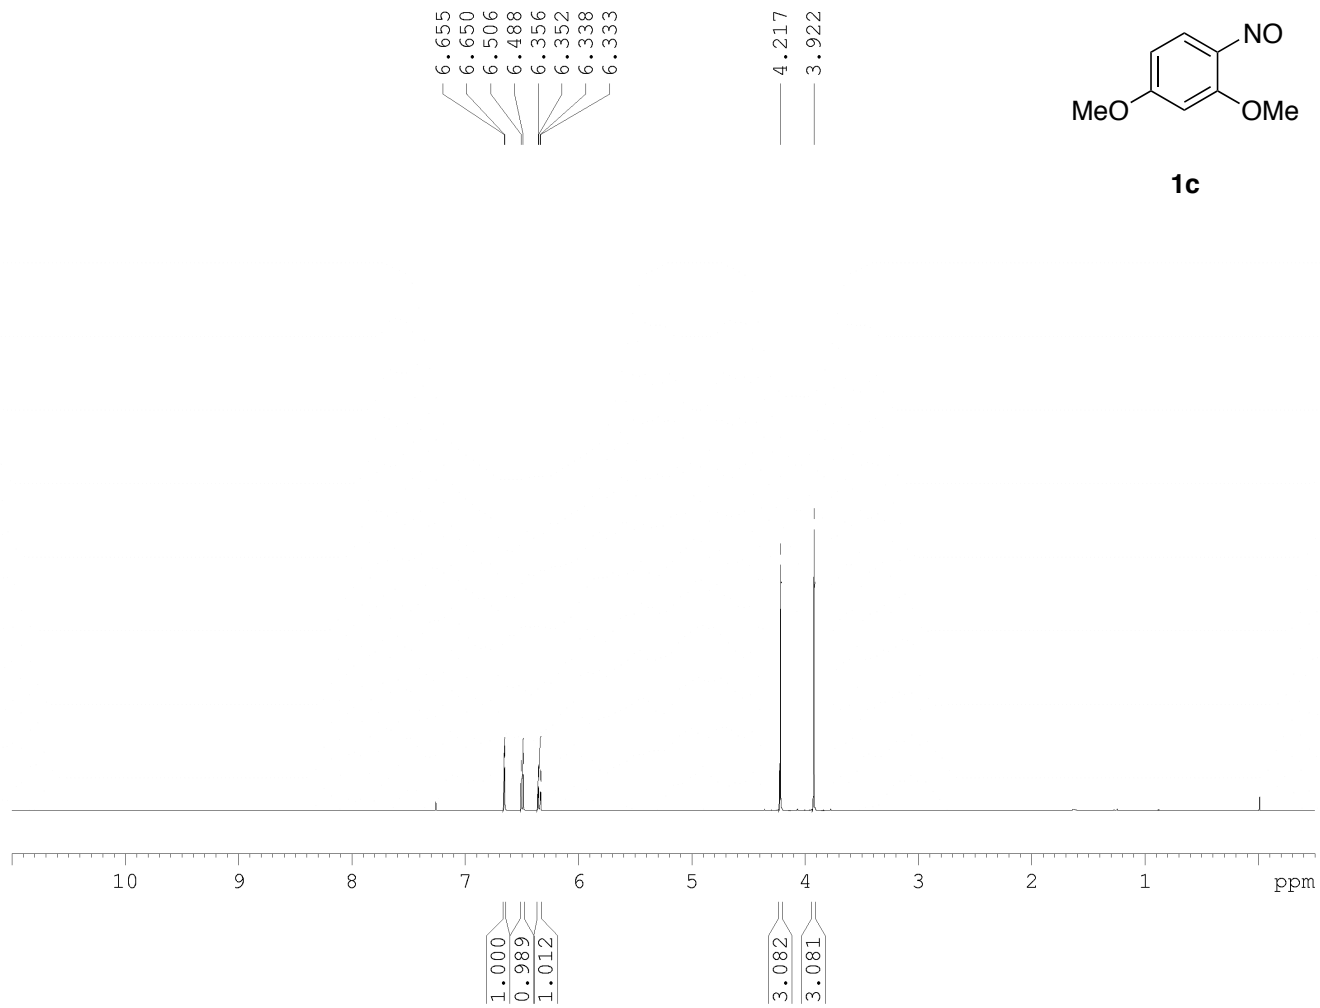

<sup>1</sup>H NMR (500 MHz, CDCl<sub>3</sub>) Spectrum of 2,4-dimethoxy-1-nitrosobenzene (1c)

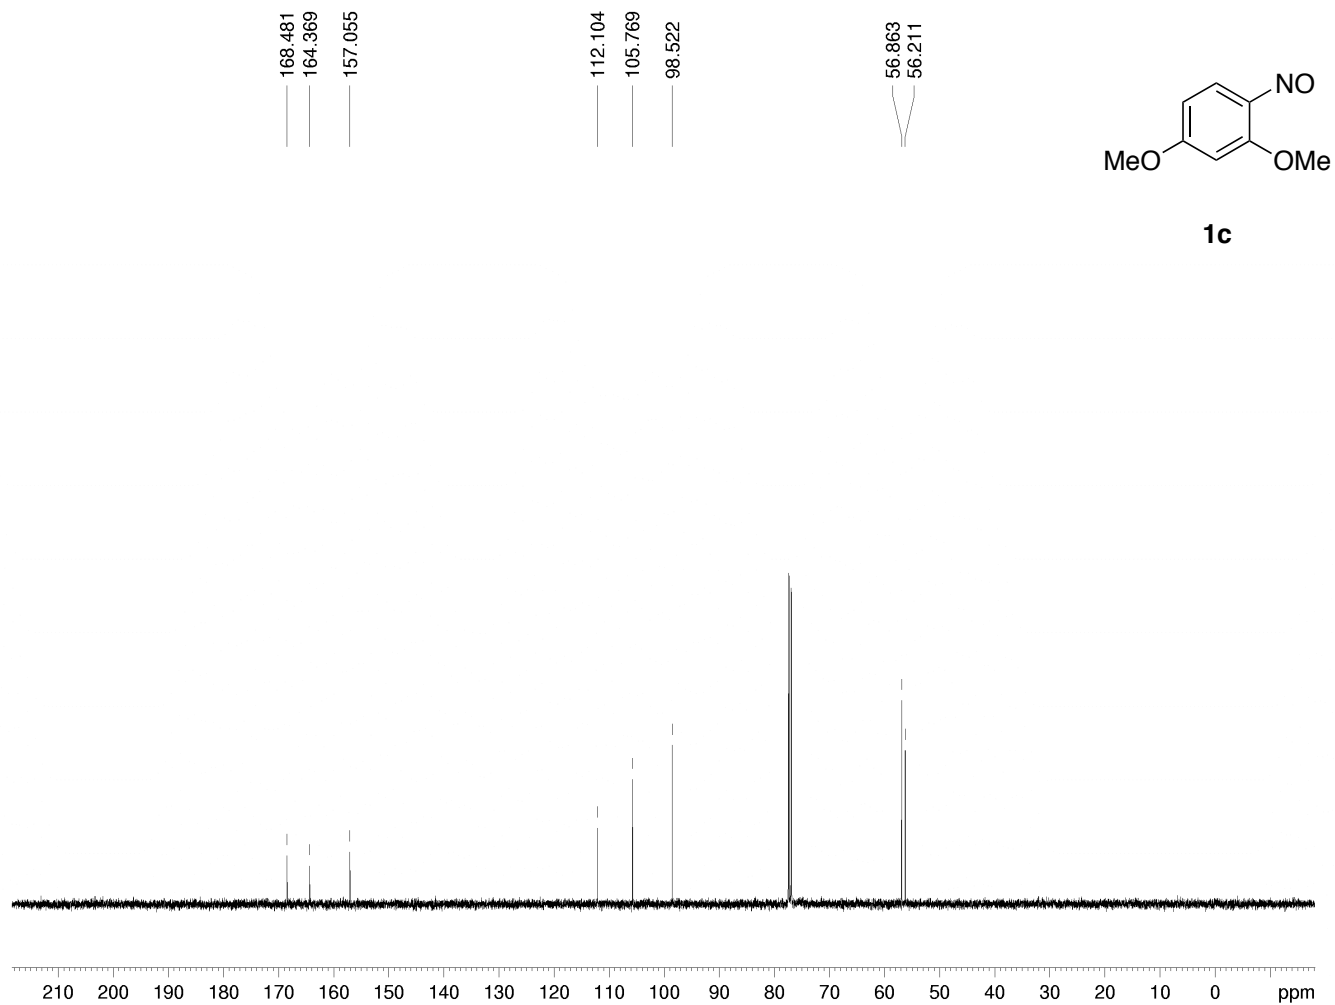

<sup>13</sup>C NMR (128.5 MHz, CDCl<sub>3</sub>) Spectrum of 2,4-dimethoxy-1-nitrosobenzene (1c)

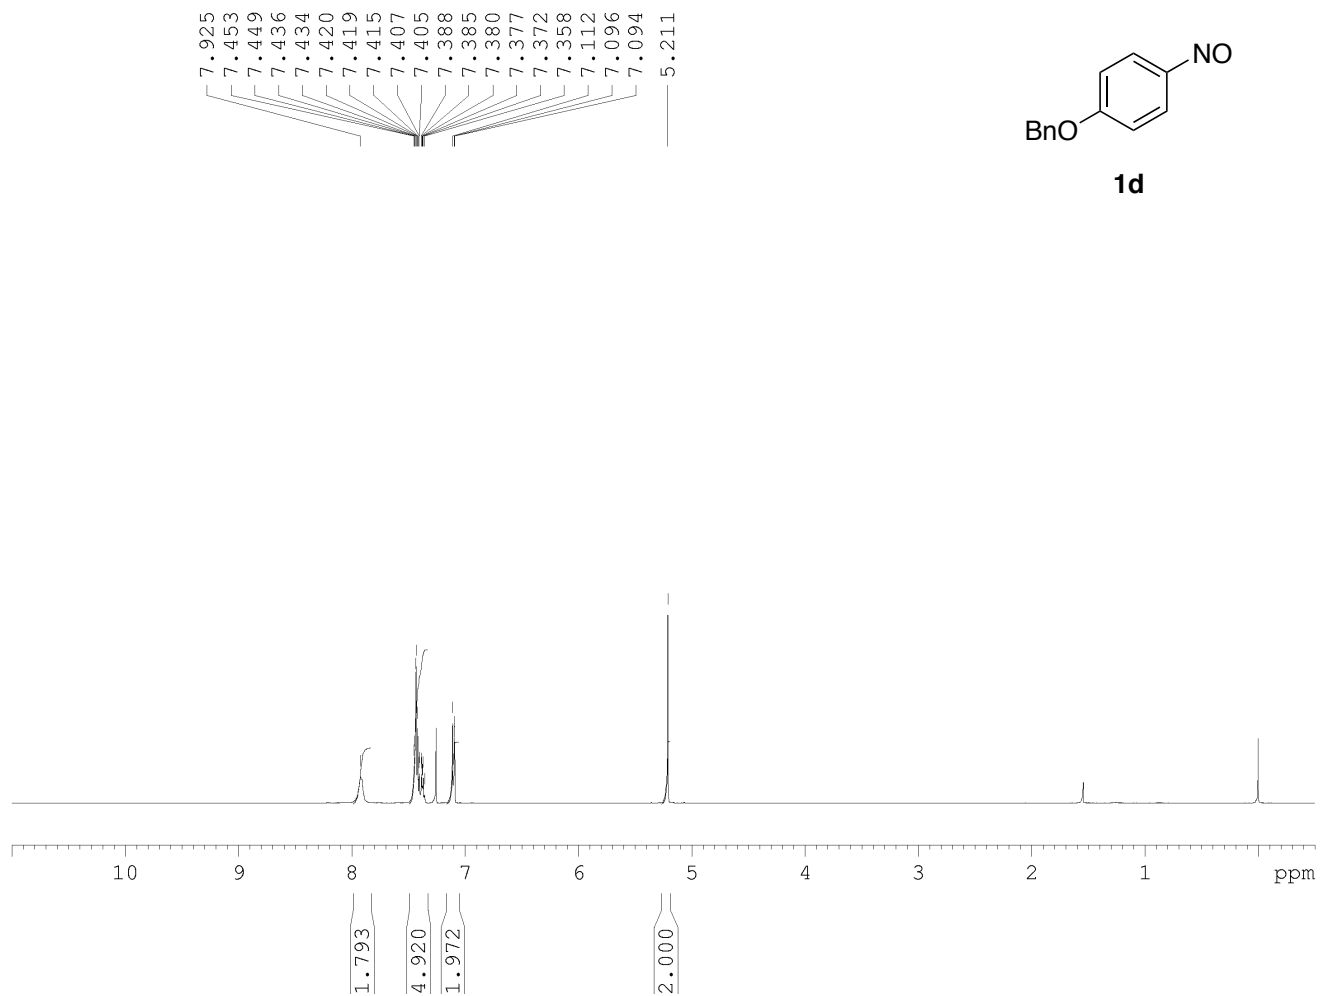

**<sup>1</sup>H NMR (500 MHz, CDCl<sub>3</sub>) Spectrum of 1-(benzyloxy)-4-nitrosobenzene (1d)**

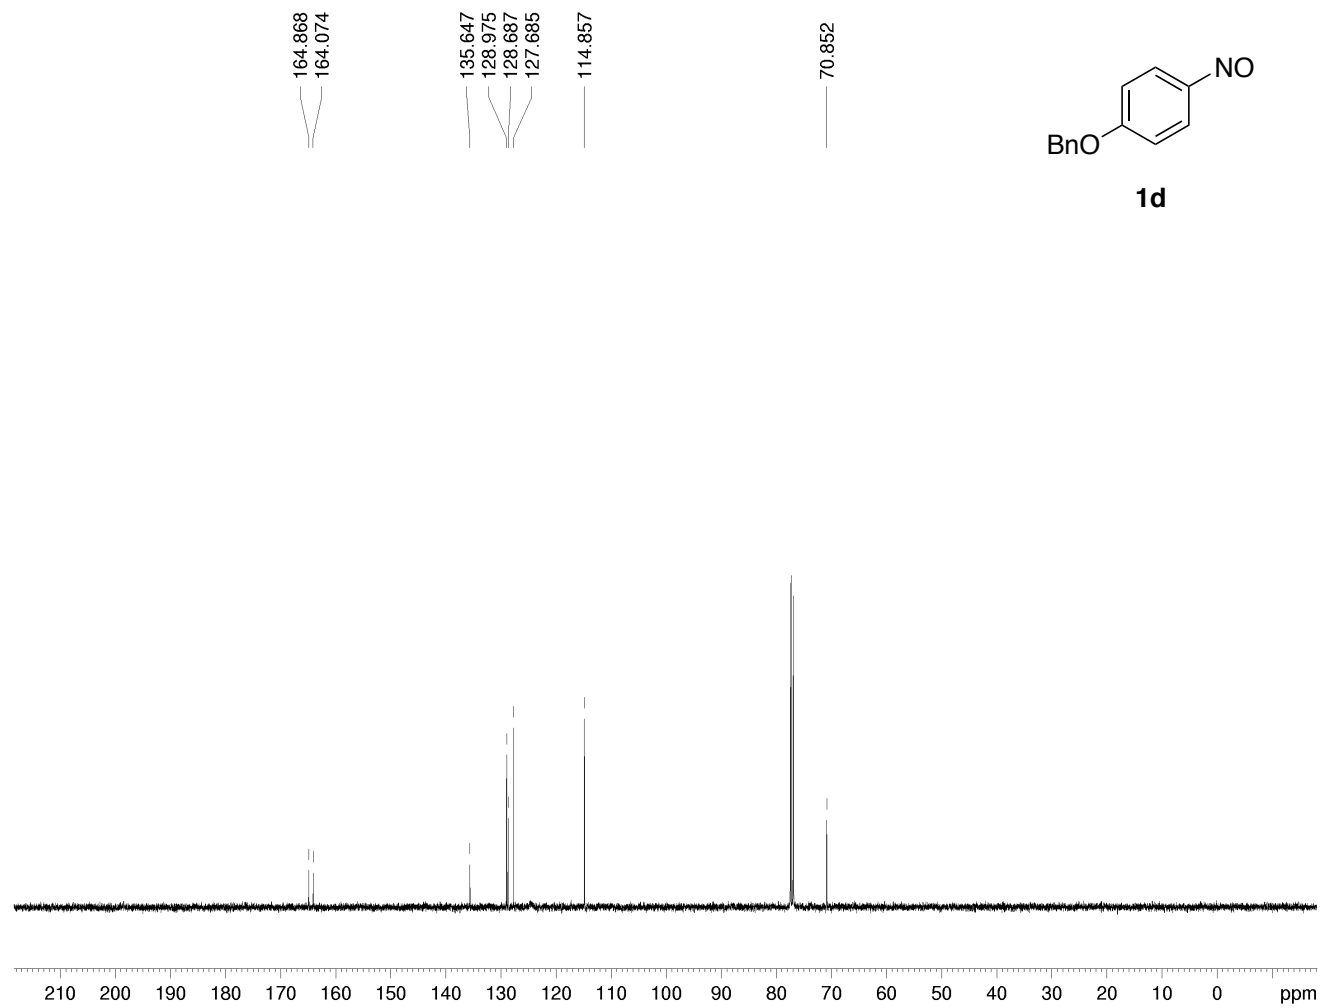

$^{13}\text{C}$  NMR (128.5 MHz,  $\text{CDCl}_3$ ) Spectrum of 1-(benzyloxy)-4-nitrosobenzene (1d)

7.844  
7.828  
7.128  
7.084  
7.067

4.381  
4.380  
4.375  
4.373  
4.372  
4.368  
4.365  
4.360  
4.327  
4.322  
4.319  
4.315  
4.312  
4.307

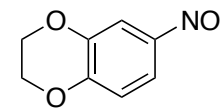

**1e**

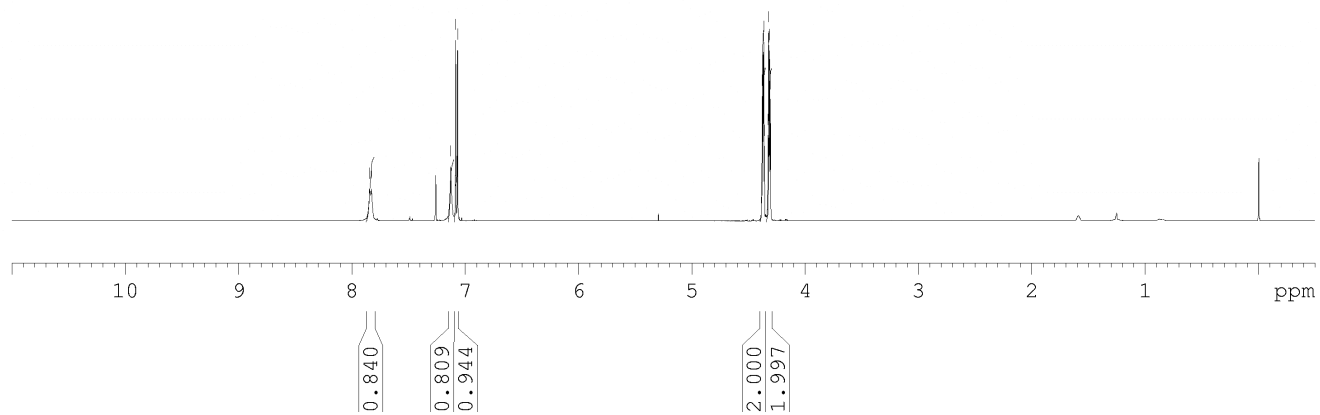

**<sup>1</sup>H NMR (500 MHz, CDCl<sub>3</sub>) Spectrum of 6-nitroso-2,3-dihydrobenzo[b][1,4]dioxine (1e)**

163.633  
150.908  
143.854  
117.584  
65.083  
64.190

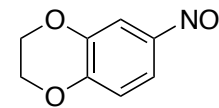

**1e**

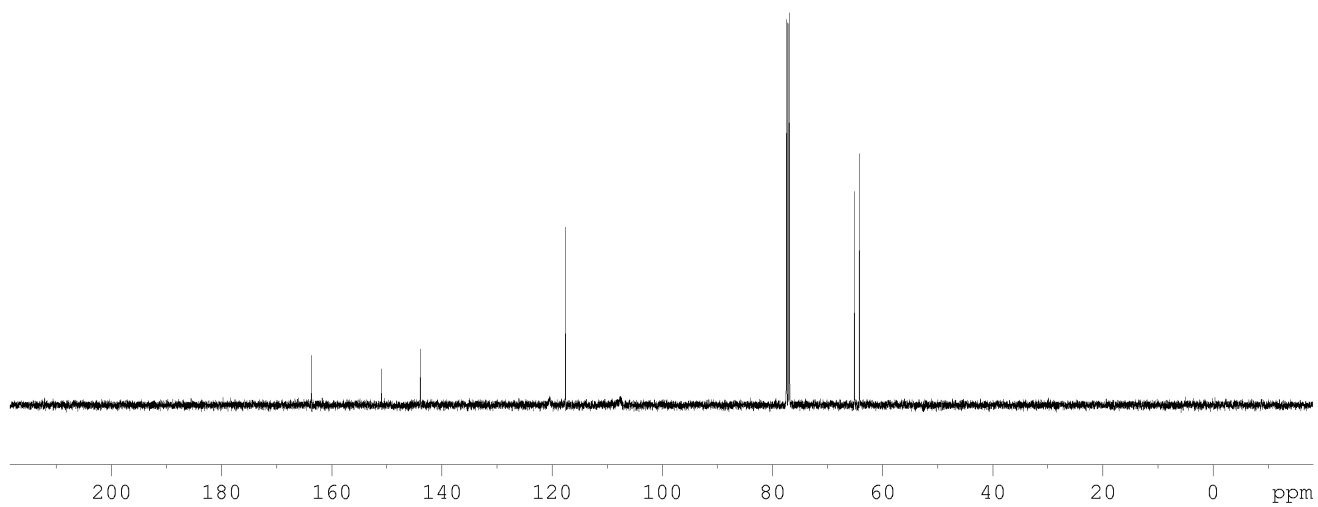

**<sup>13</sup>C NMR (128.5 MHz, CDCl<sub>3</sub>) Spectrum of 6-nitroso-2,3-dihydrobenzo[b][1,4]dioxine (1e)**

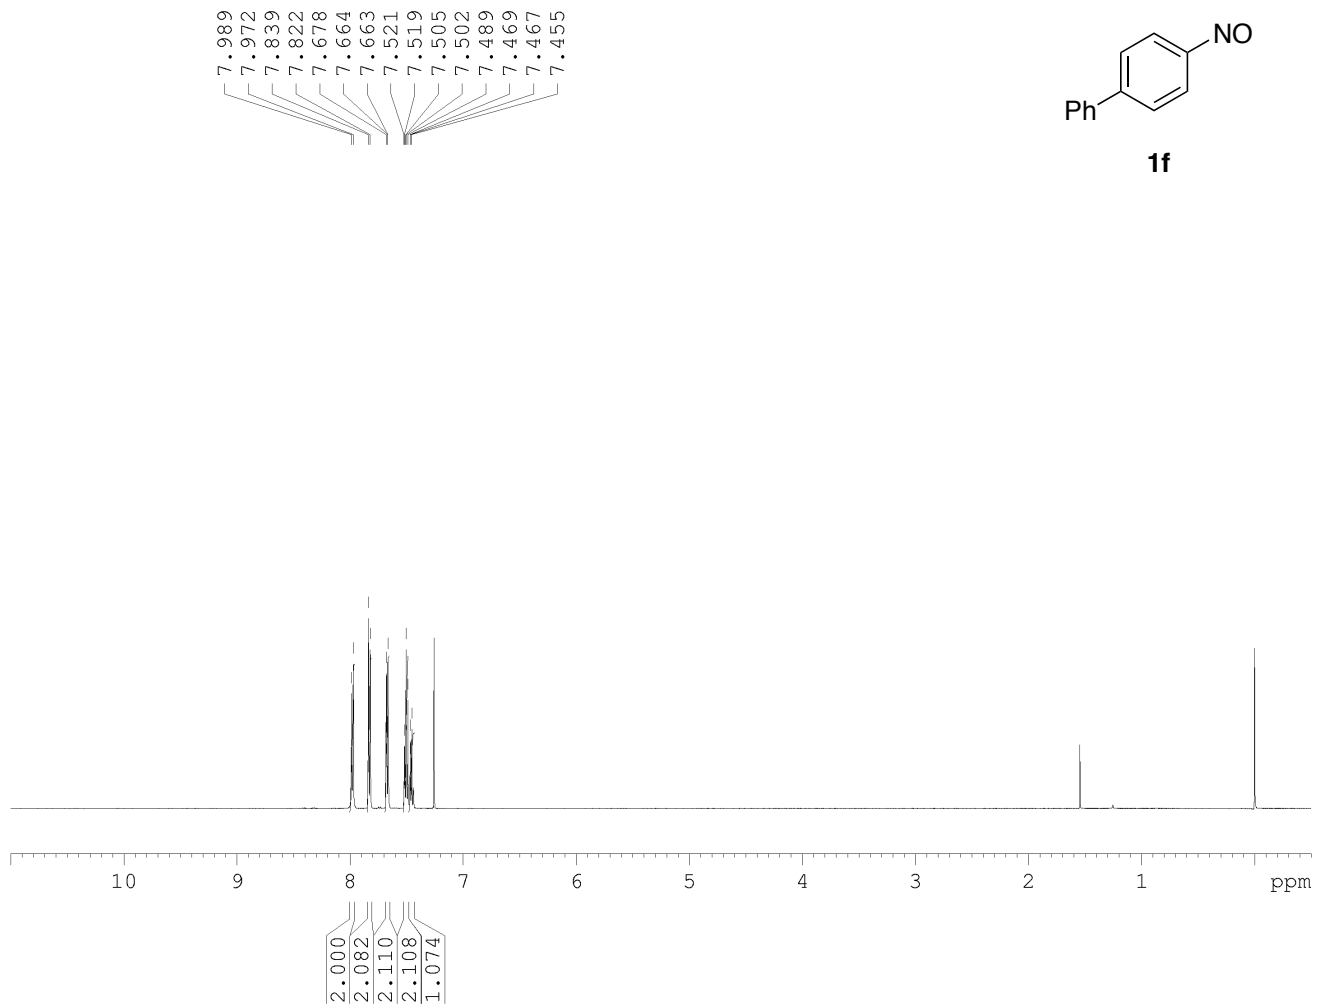

$^1\text{H}$  NMR (500 MHz,  $\text{CDCl}_3$ ) Spectrum of 4-nitrosobiphenyl (1f)



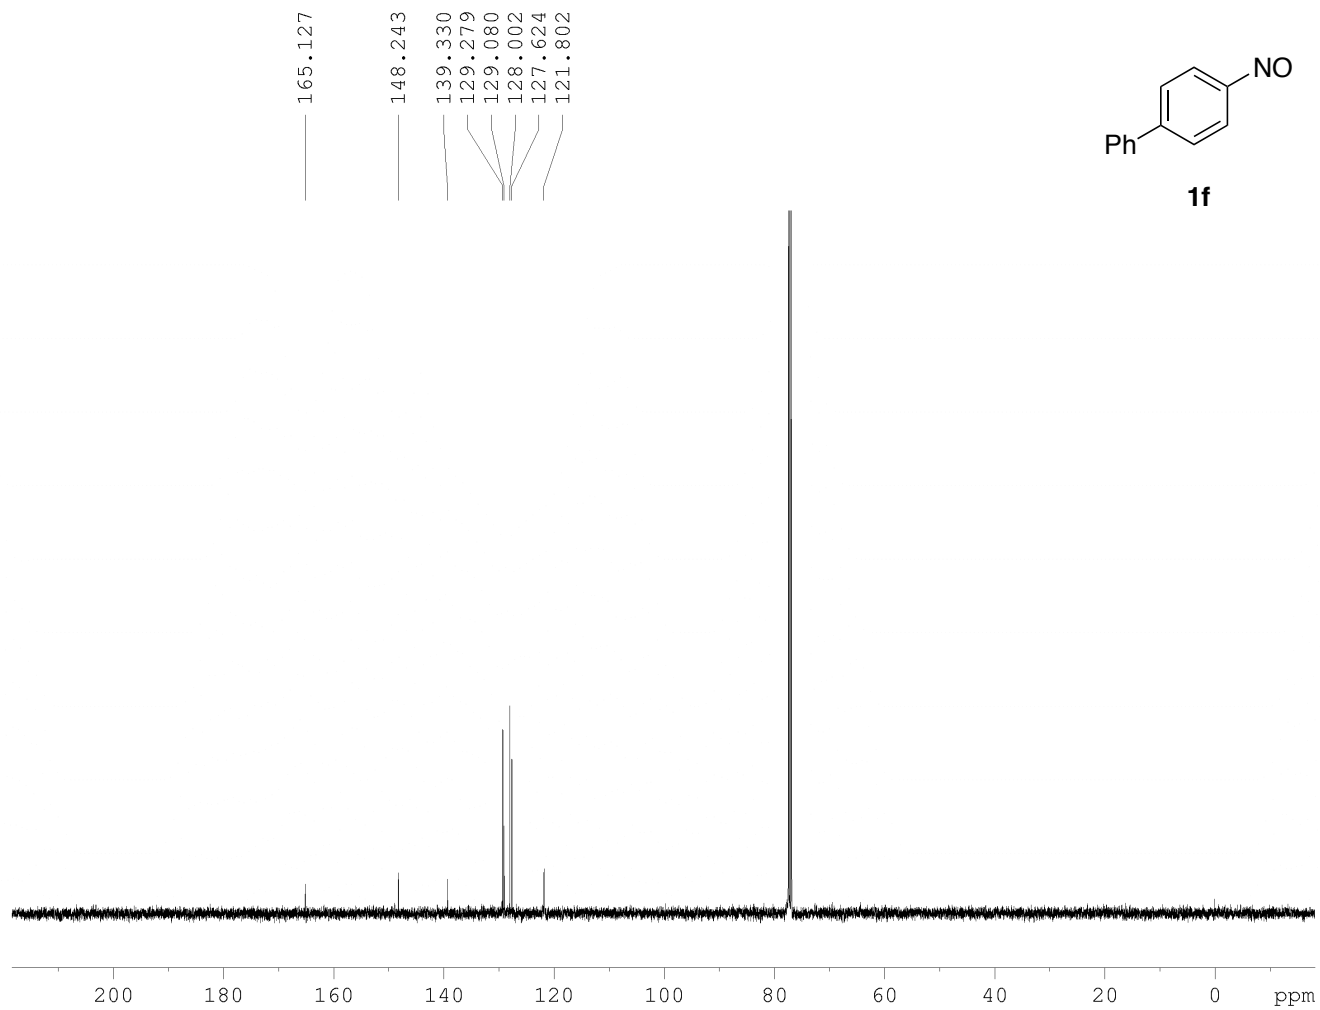

$^{13}\text{C}$  NMR (128.5 MHz,  $\text{CDCl}_3$ ) Spectrum of 4-nitrosobiphenyl (1f)

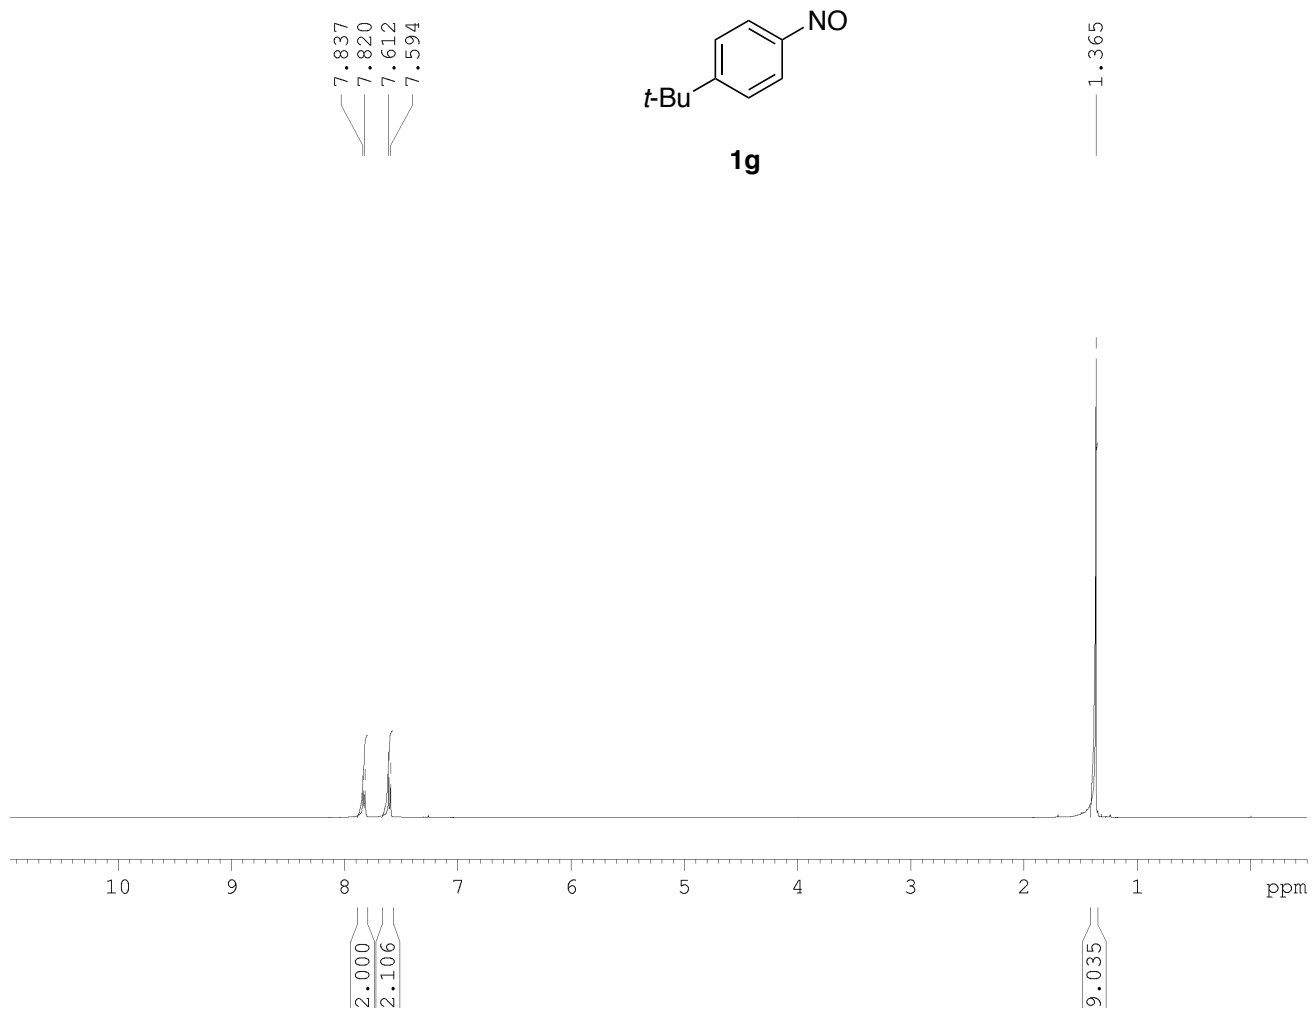

$^1\text{H}$  NMR (500 MHz,  $\text{CDCl}_3$ ) Spectrum of 1-tert-butyl-4-nitrosobenzene (1g)

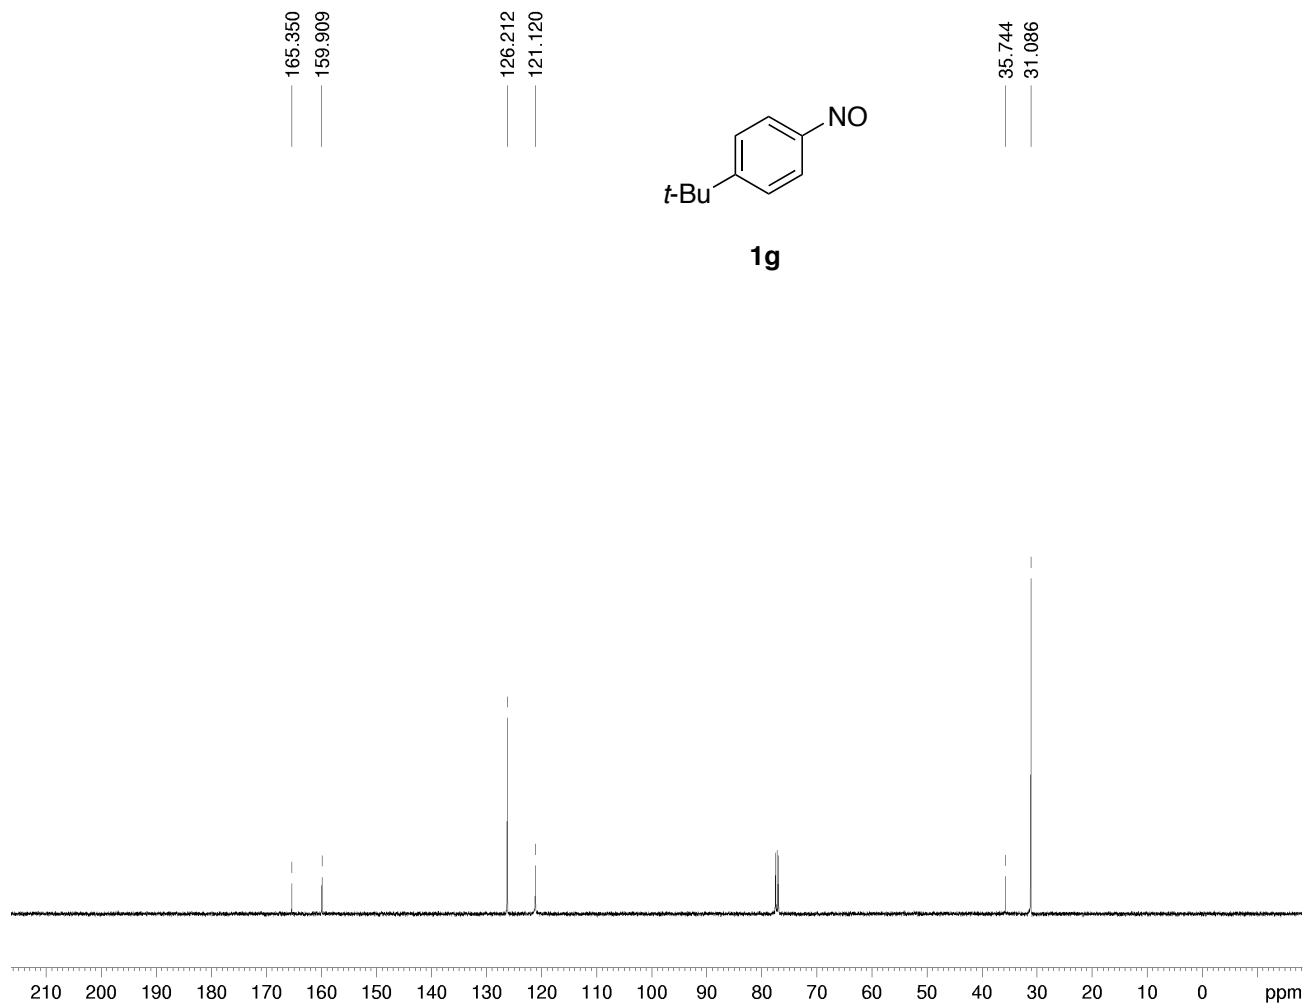

<sup>13</sup>C NMR (128.5 MHz, CDCl<sub>3</sub>) Spectrum of 1-tert-butyl-4-nitrosobenzene (1g)

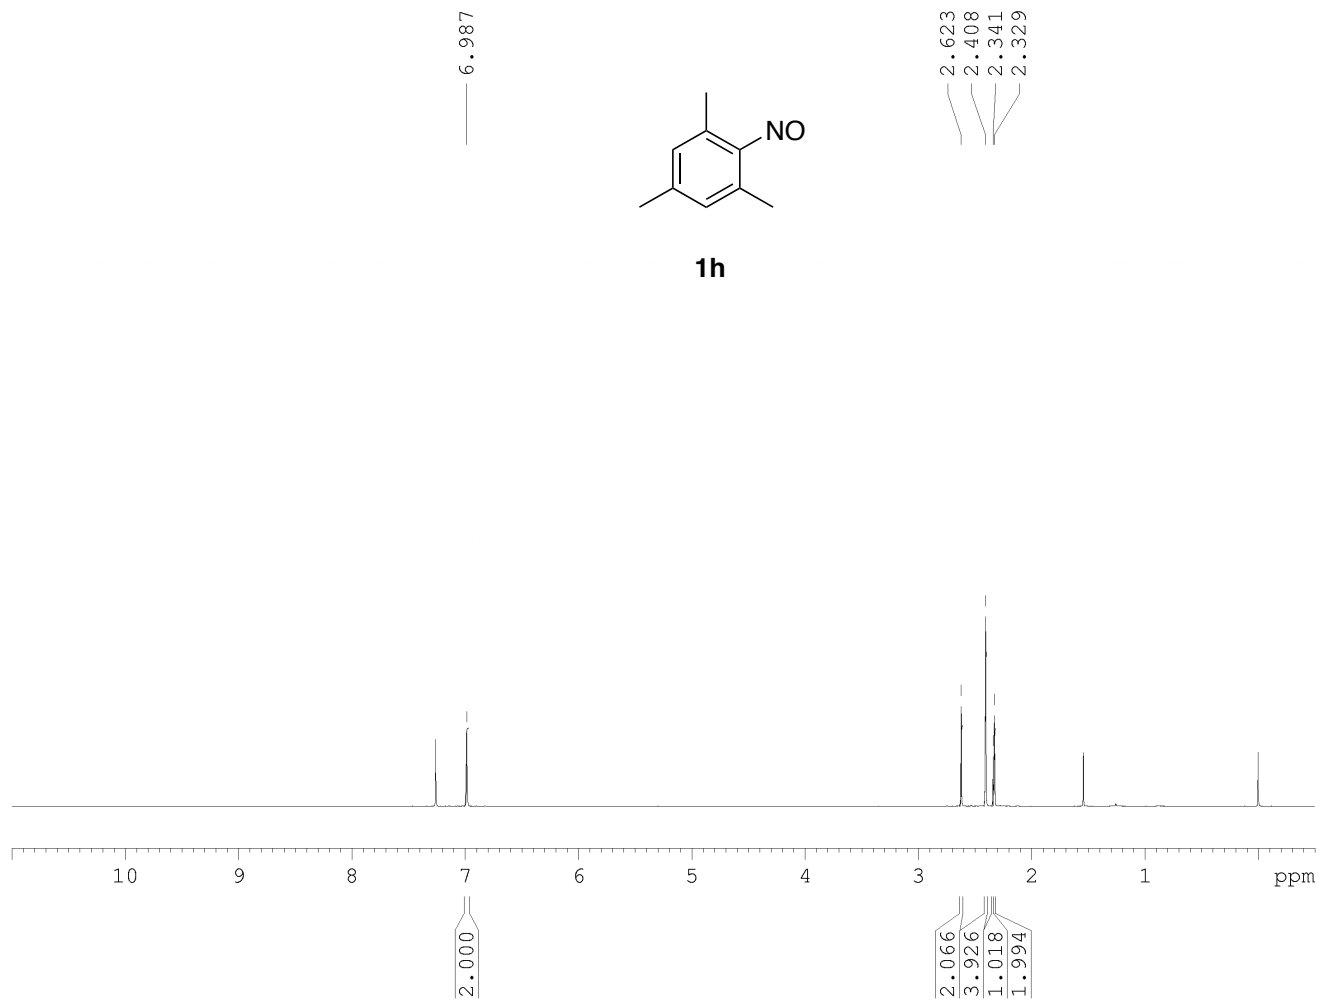

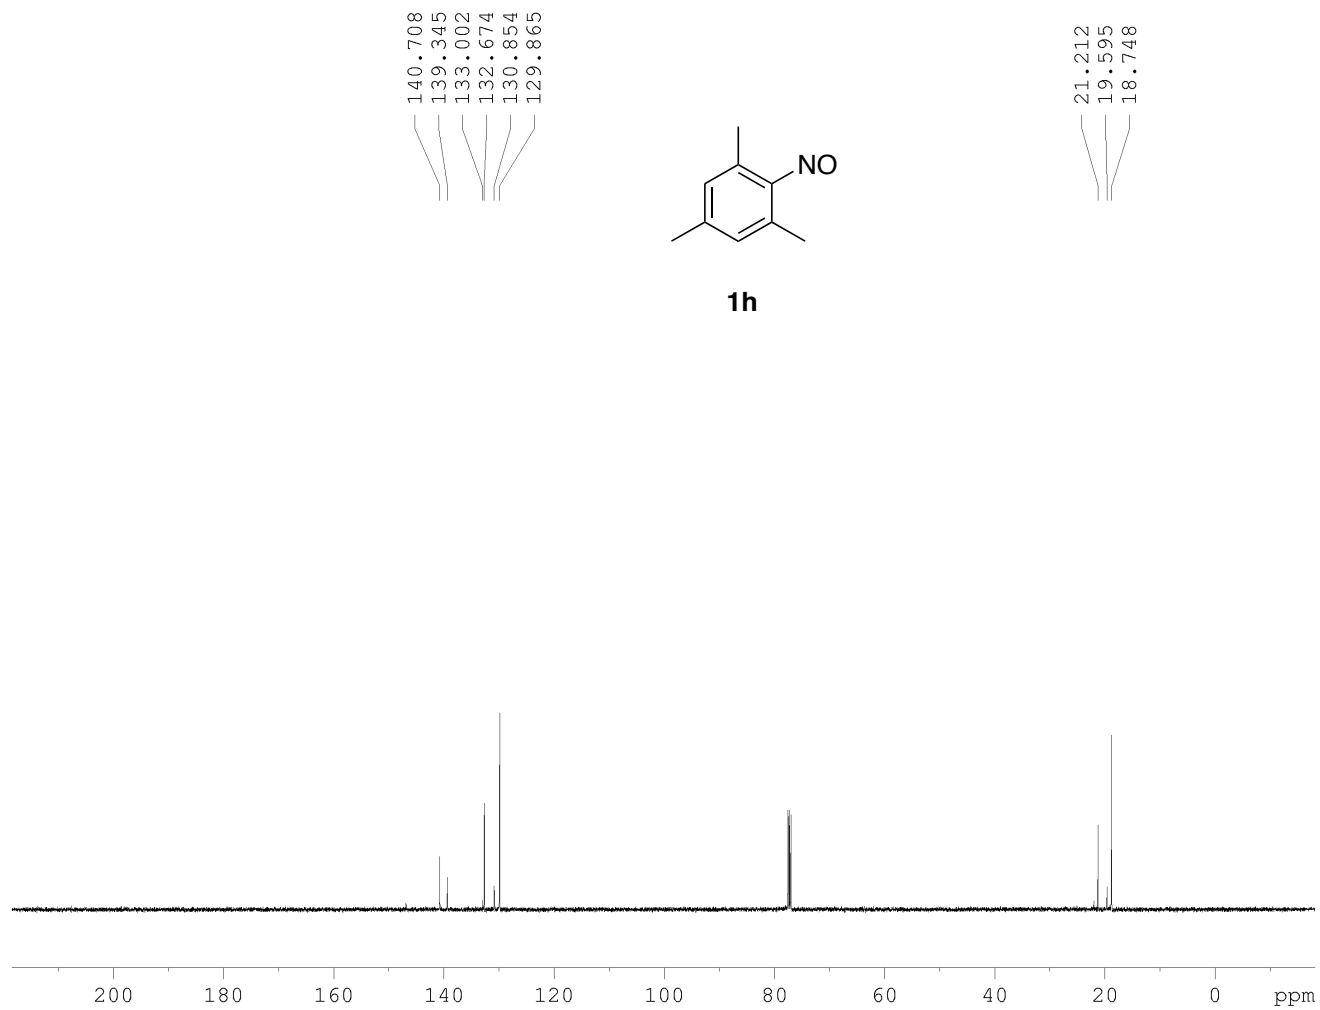

<sup>13</sup>C NMR (128.5 MHz, CDCl<sub>3</sub>) Spectrum of 1,3,5-trimethyl-2-nitrosobenzene (1h)

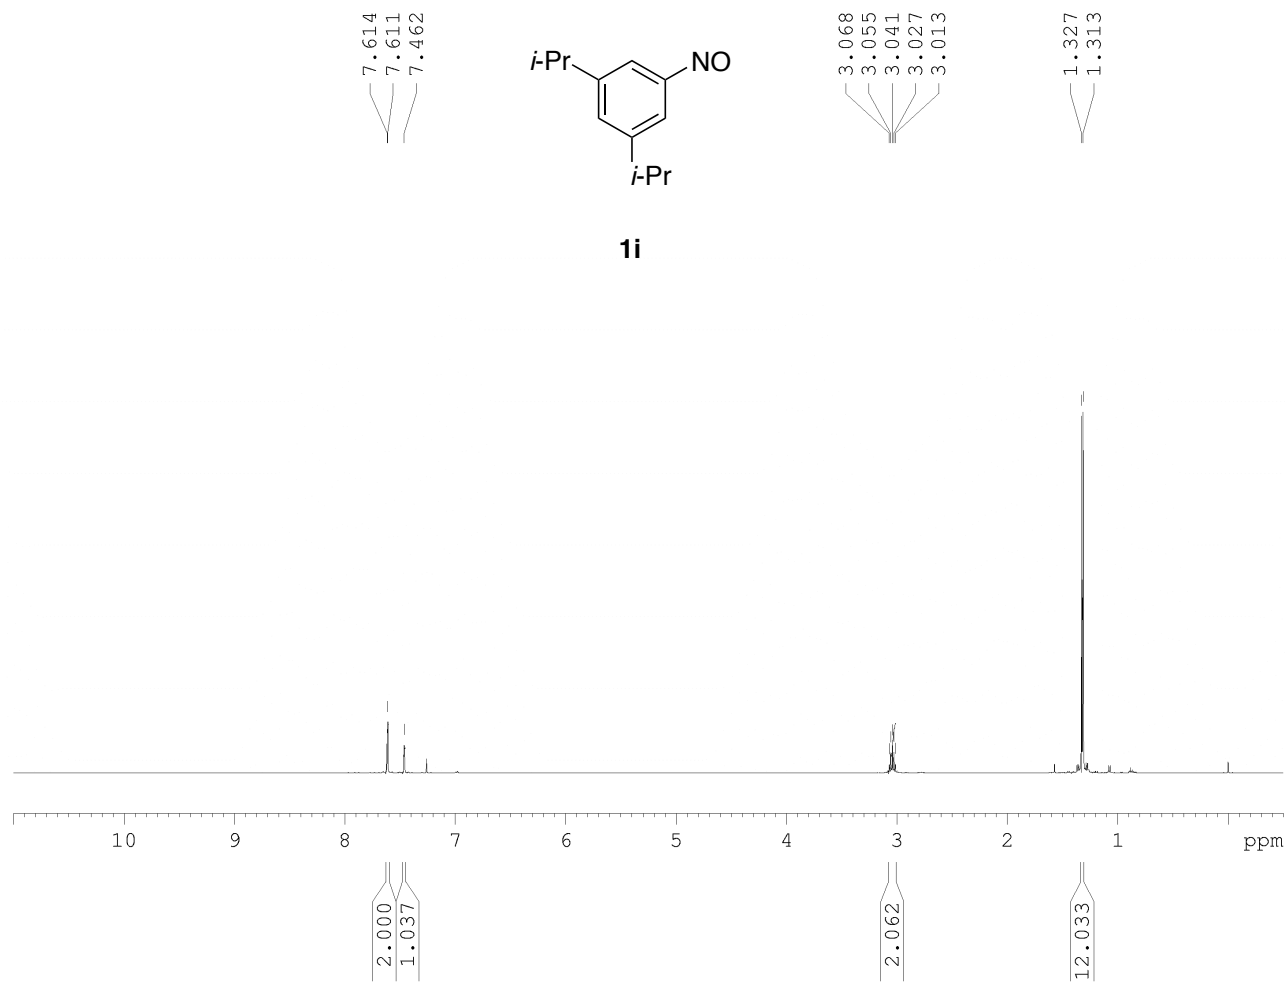

<sup>1</sup>H NMR (500 MHz, CDCl<sub>3</sub>) Spectrum of 1,3-diisopropyl-5-nitrosobenzene (**1i**)

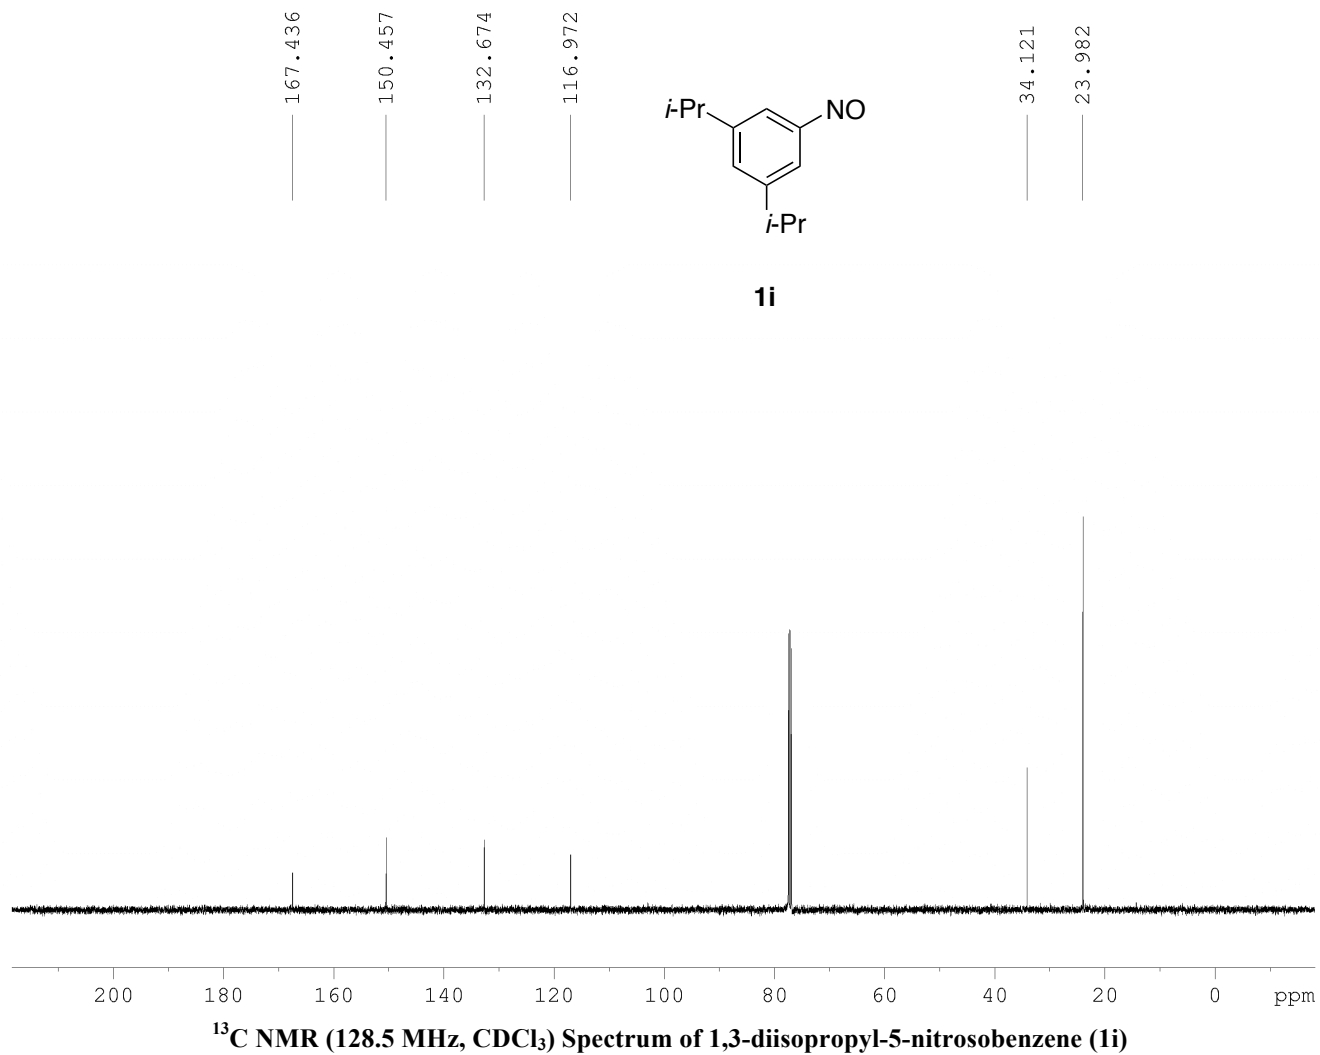

8.193  
8.174  
6.933  
6.915  
5.723

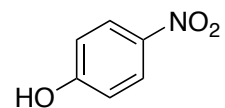

**1j**

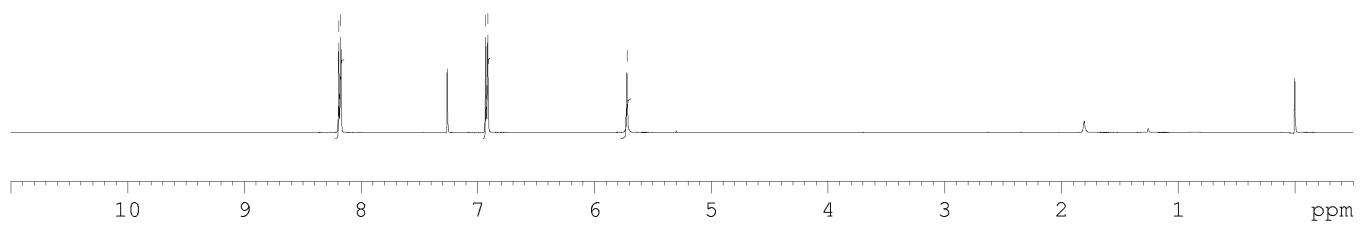

1.961  
1.999  
0.985

**<sup>1</sup>H NMR (500 MHz, CDCl<sub>3</sub>) Spectrum of 4-nitrophenol (1j)**



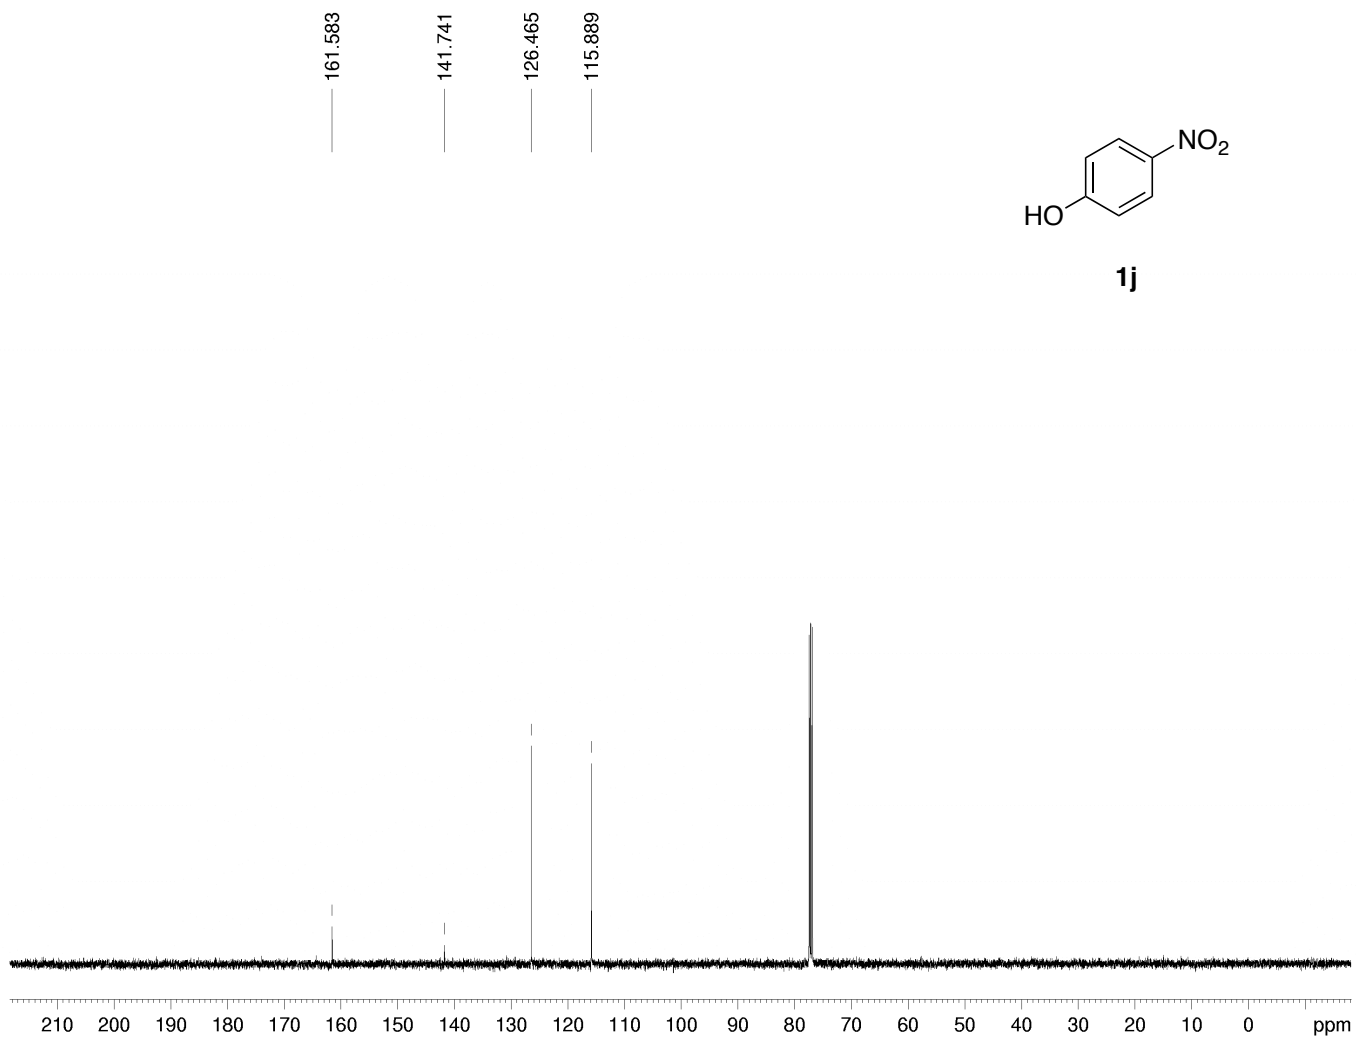

<sup>13</sup>C NMR (128.5 MHz, CDCl<sub>3</sub>) Spectrum of 4-nitrophenol (1j)

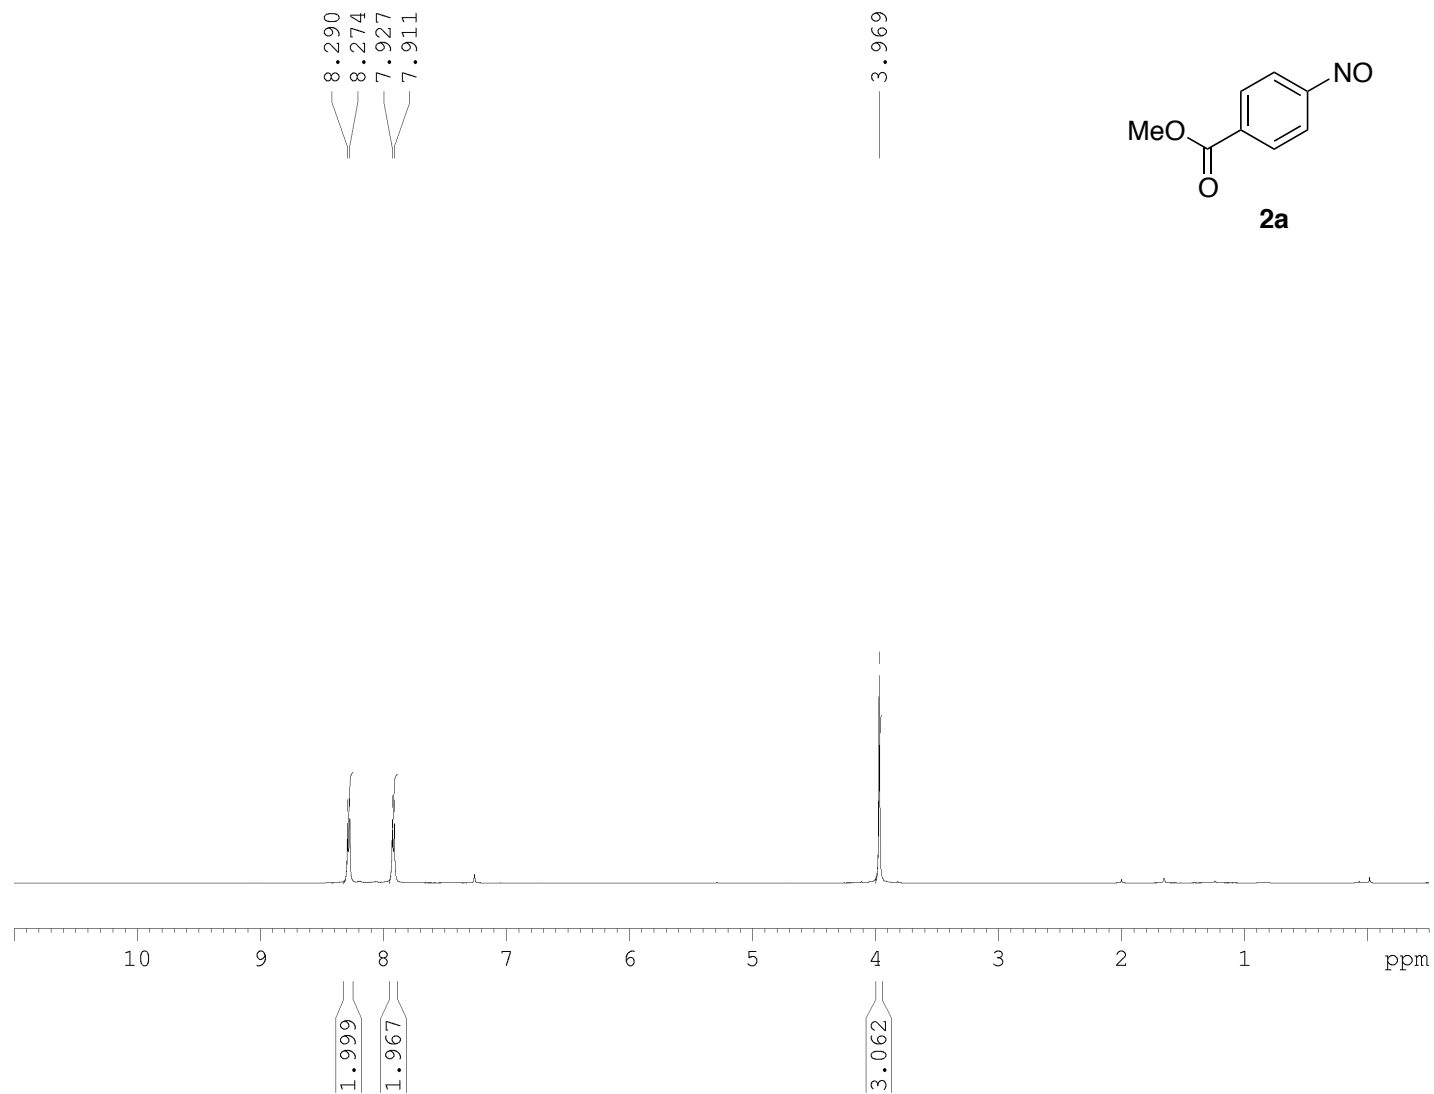

<sup>1</sup>H NMR (500 MHz, CDCl<sub>3</sub>) Spectrum of methyl 4-nitrobenzoate (2a)

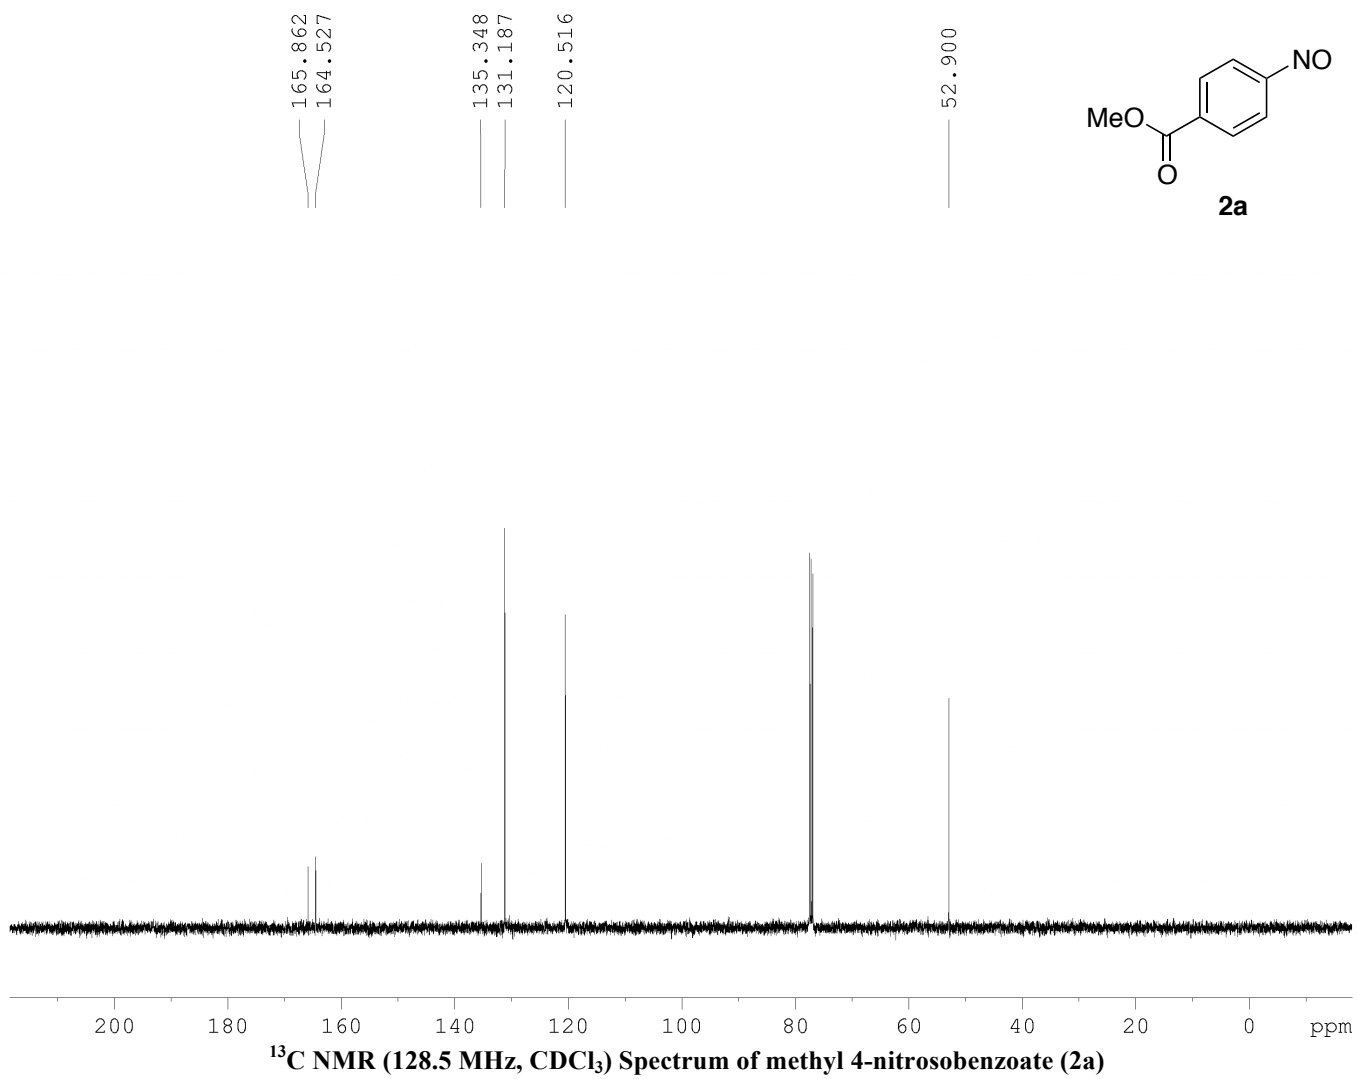

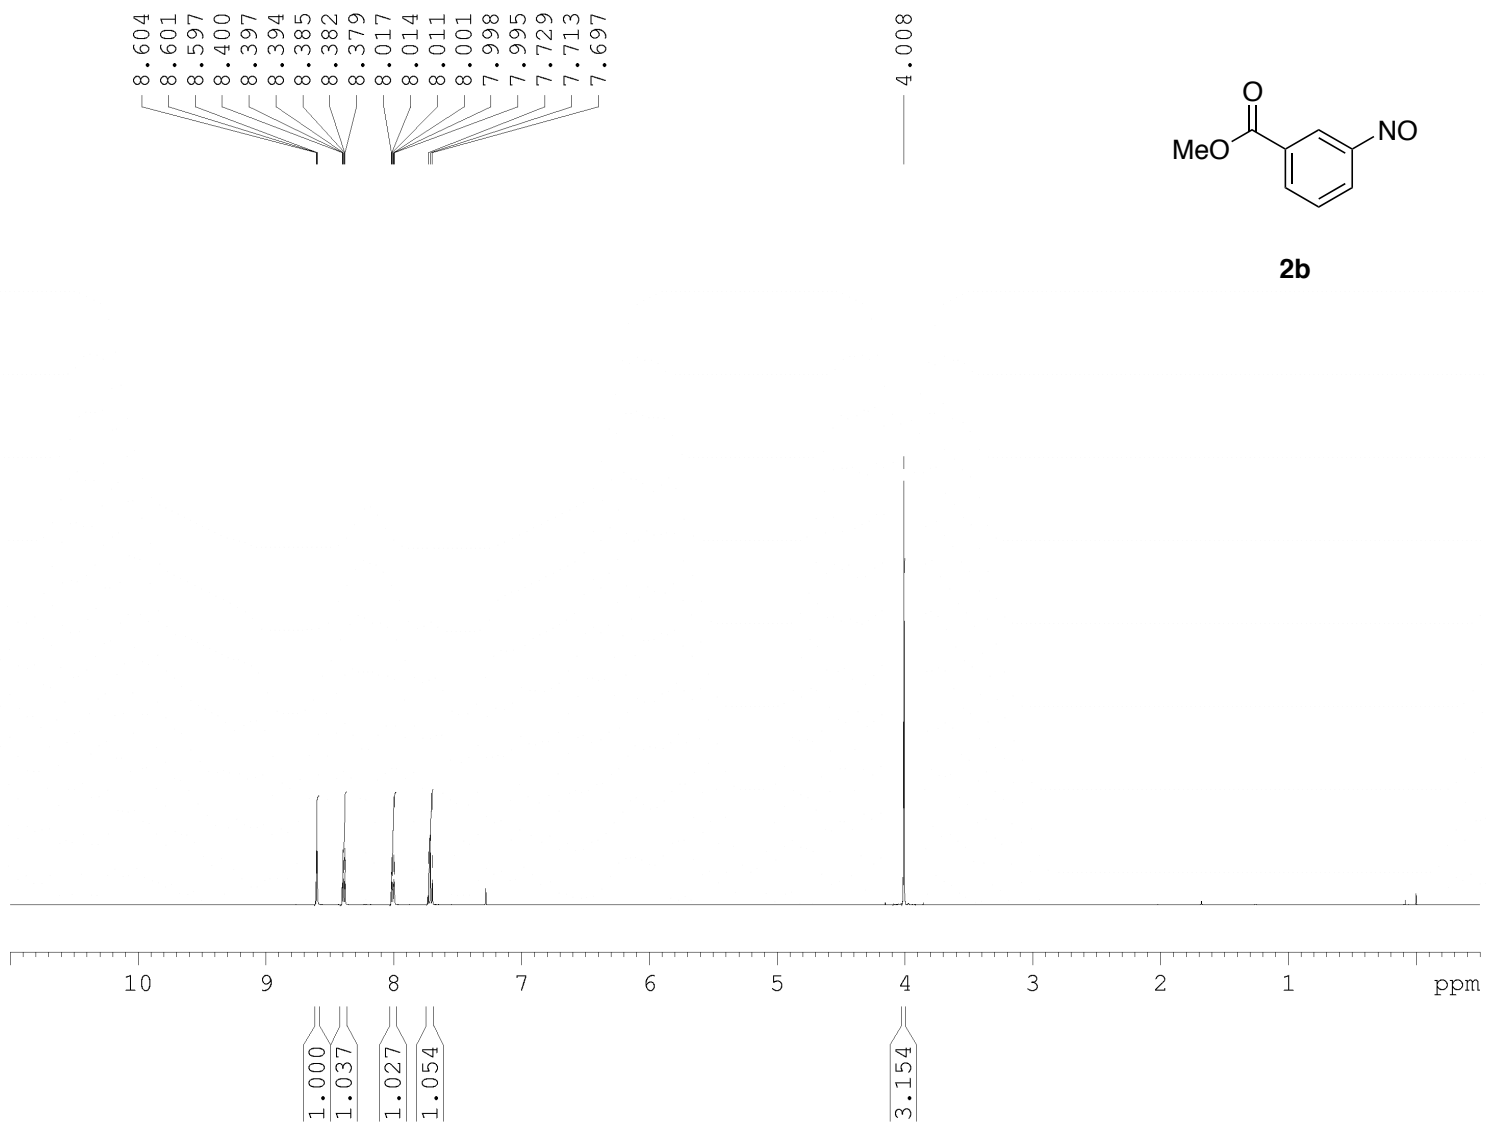

<sup>1</sup>H NMR (500 MHz, CDCl<sub>3</sub>) Spectrum of methyl 3-nitrosobenzoate (2b)

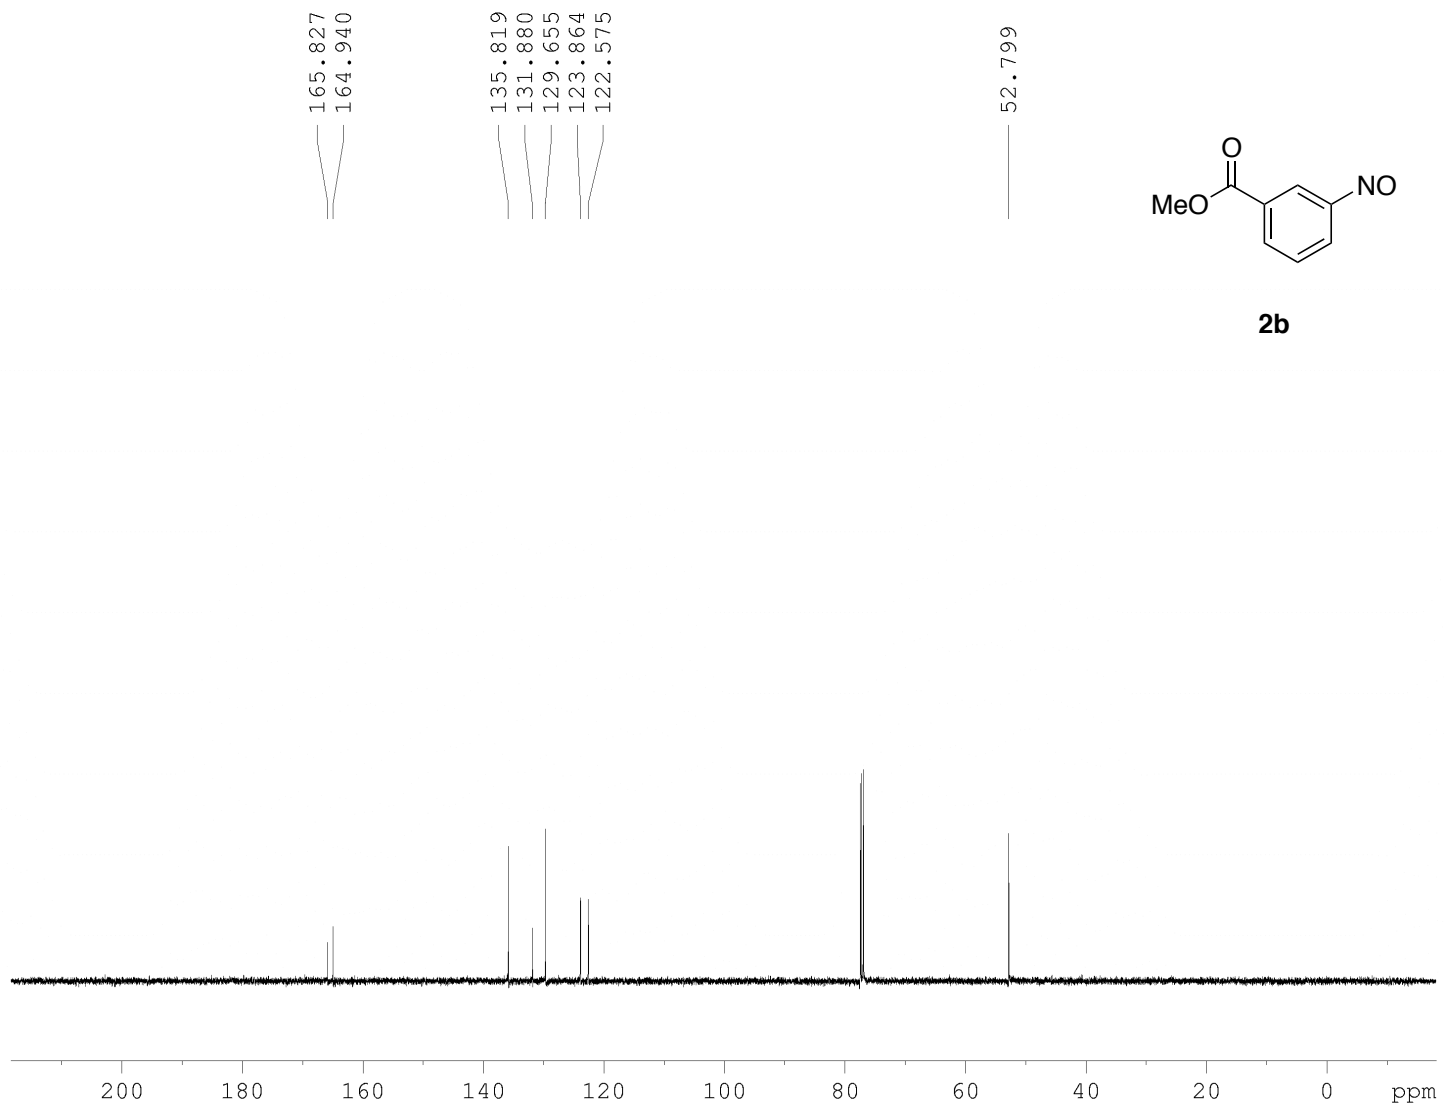

<sup>13</sup>C NMR (128.5 MHz, CDCl<sub>3</sub>) Spectrum of methyl 3-nitrosobenzoate (2b)

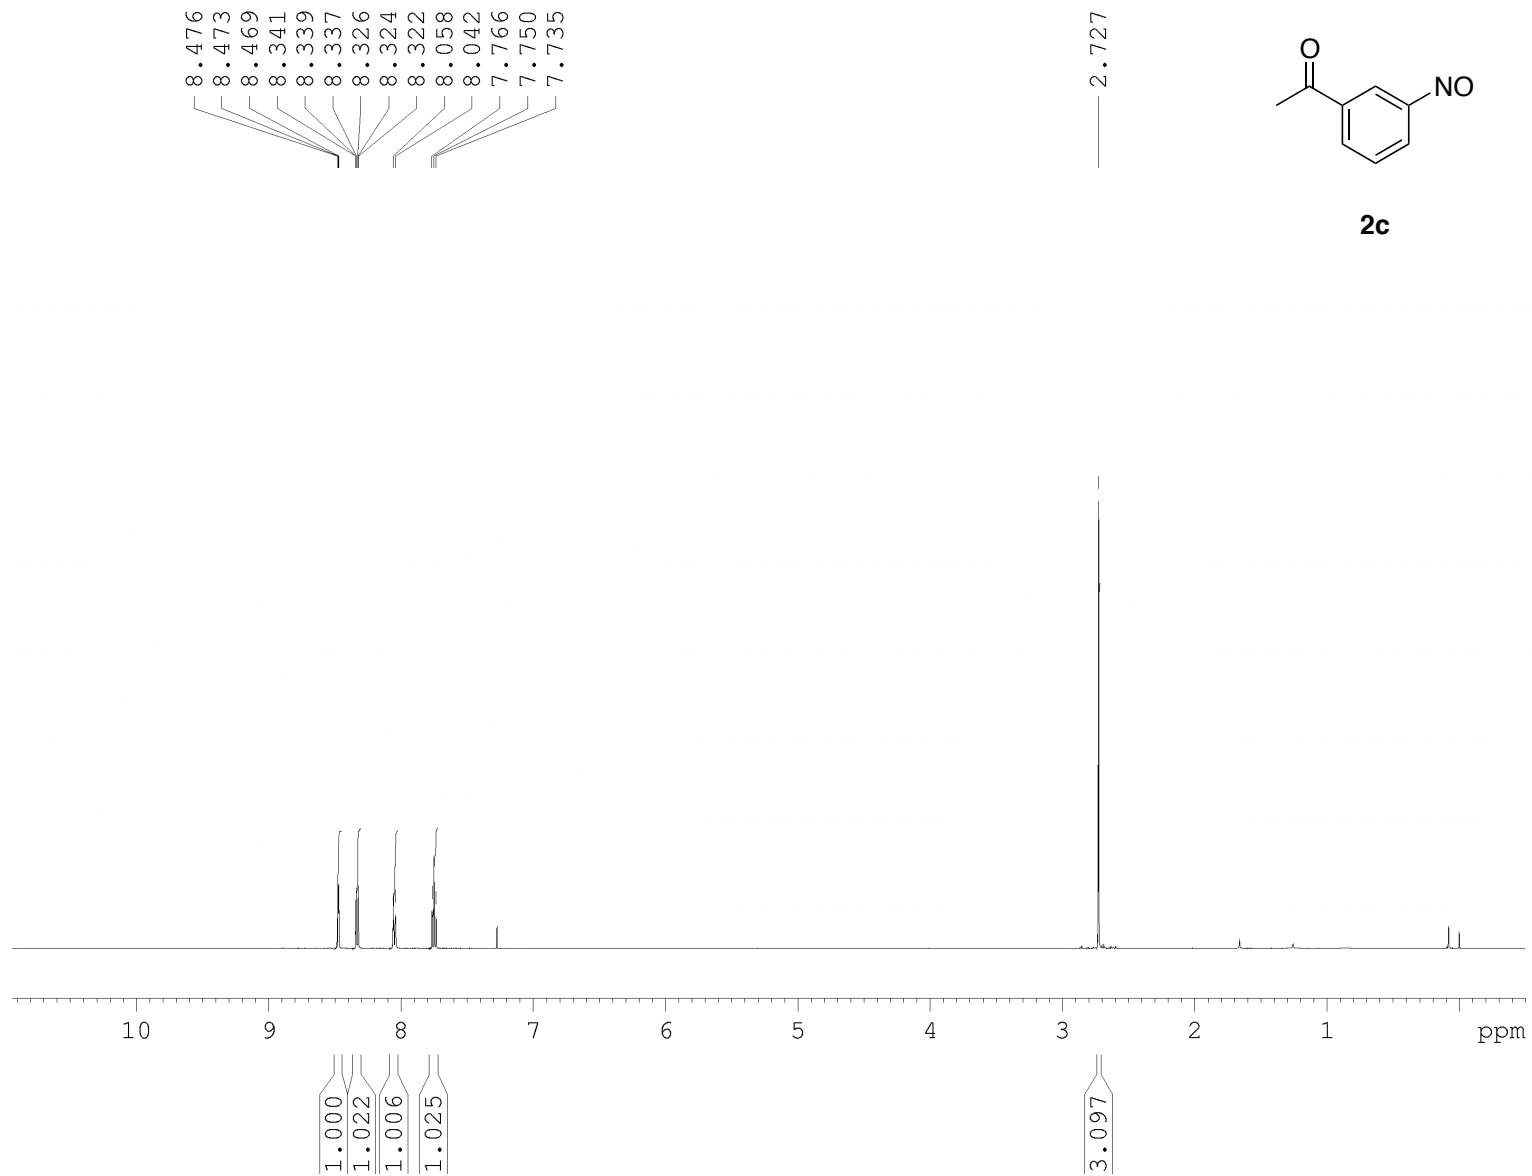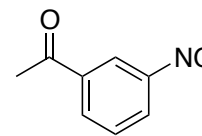

**2c**

**<sup>1</sup>H NMR (500 MHz, CDCl<sub>3</sub>) Spectrum of 1-(3-nitrosophenyl)ethanone (2c)**

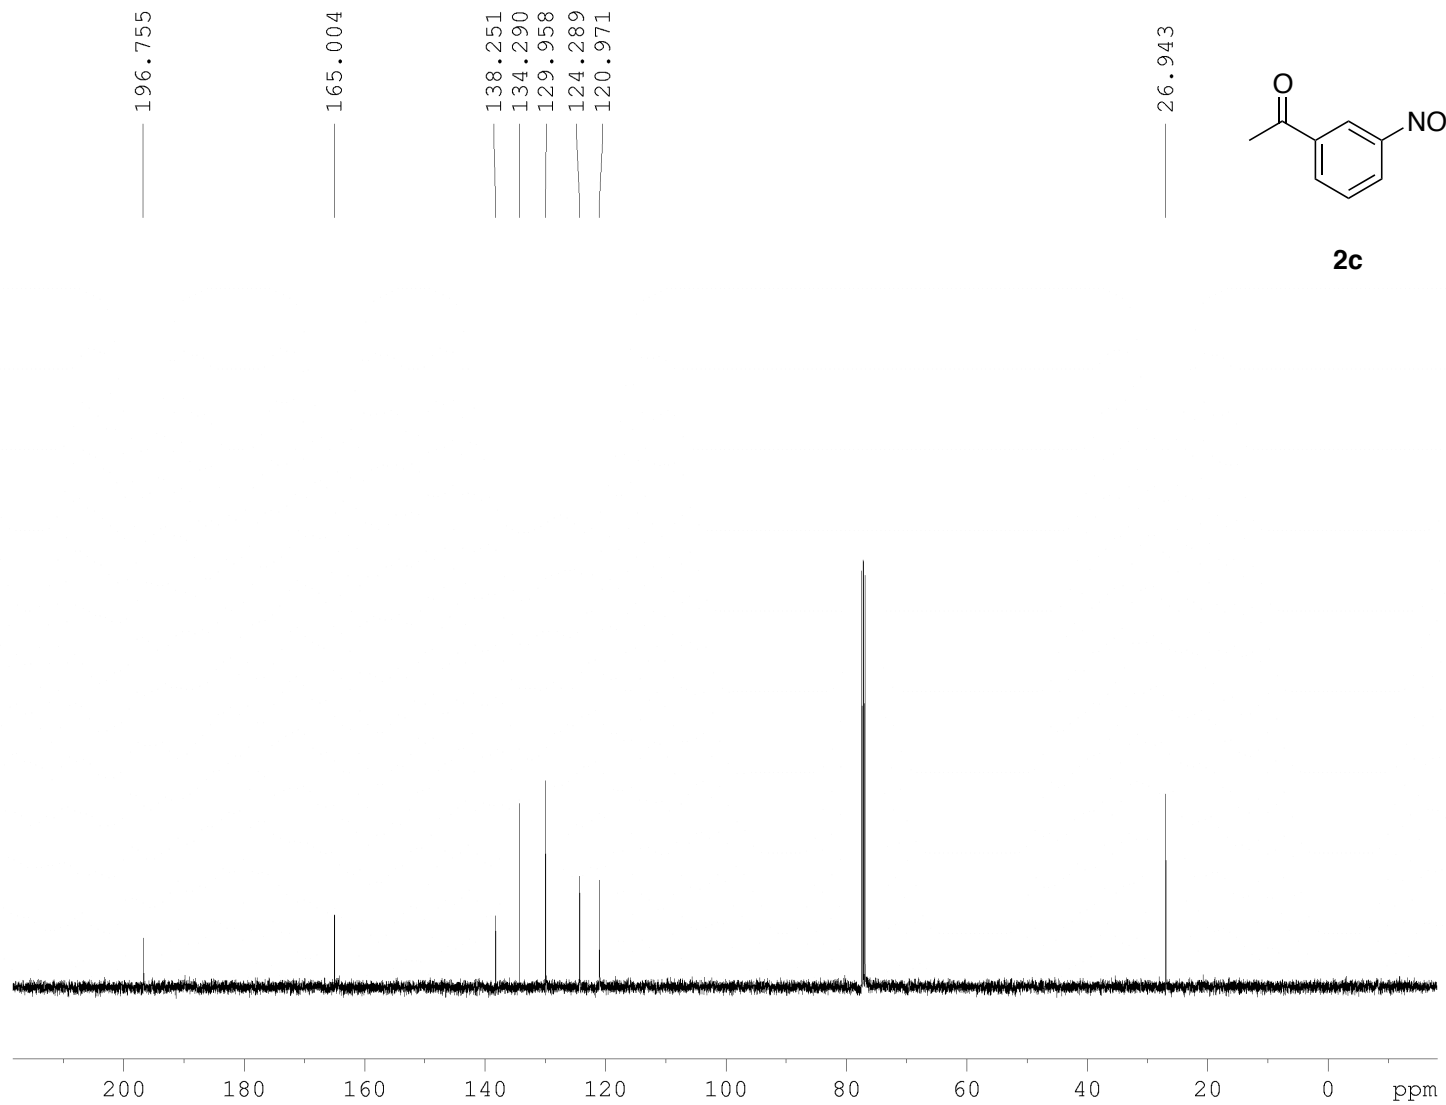

$^{13}\text{C}$  NMR (128.5 MHz,  $\text{CDCl}_3$ ) Spectrum of 1-(3-nitrosophenyl)ethanone (2c)

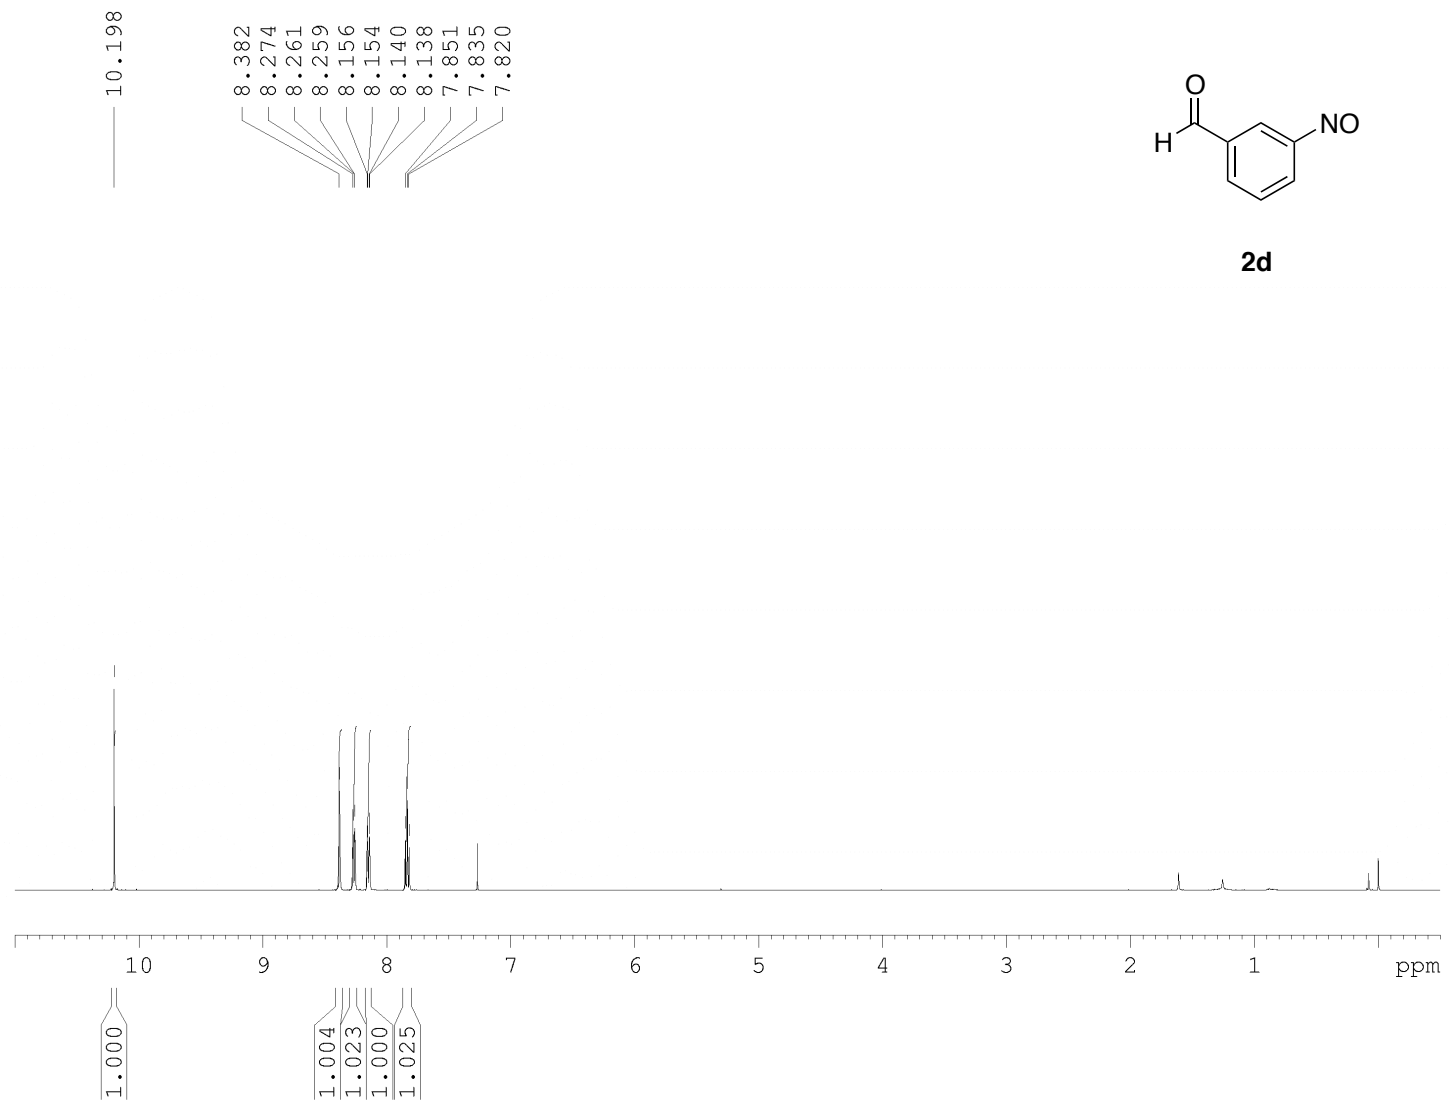

<sup>1</sup>H NMR (500 MHz, CDCl<sub>3</sub>) Spectrum of 3-nitrosobenzaldehyde (2d)



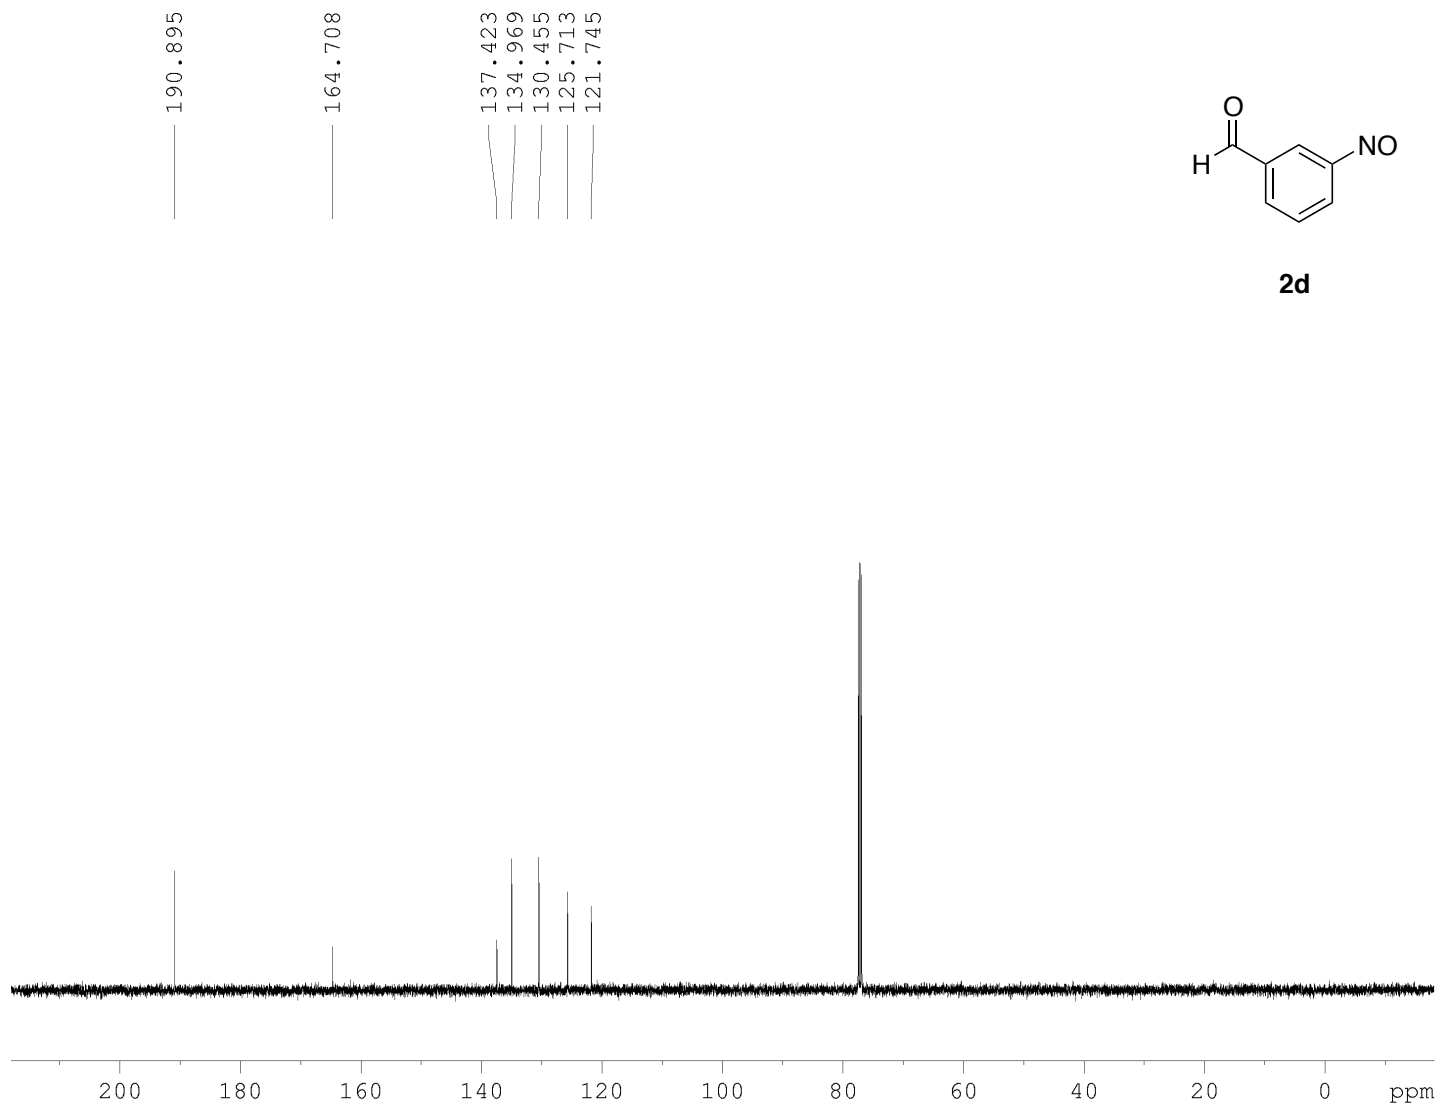

$^{13}\text{C}$  NMR (128.5 MHz,  $\text{CDCl}_3$ ) Spectrum of 3-nitrosobenzaldehyde (2d)

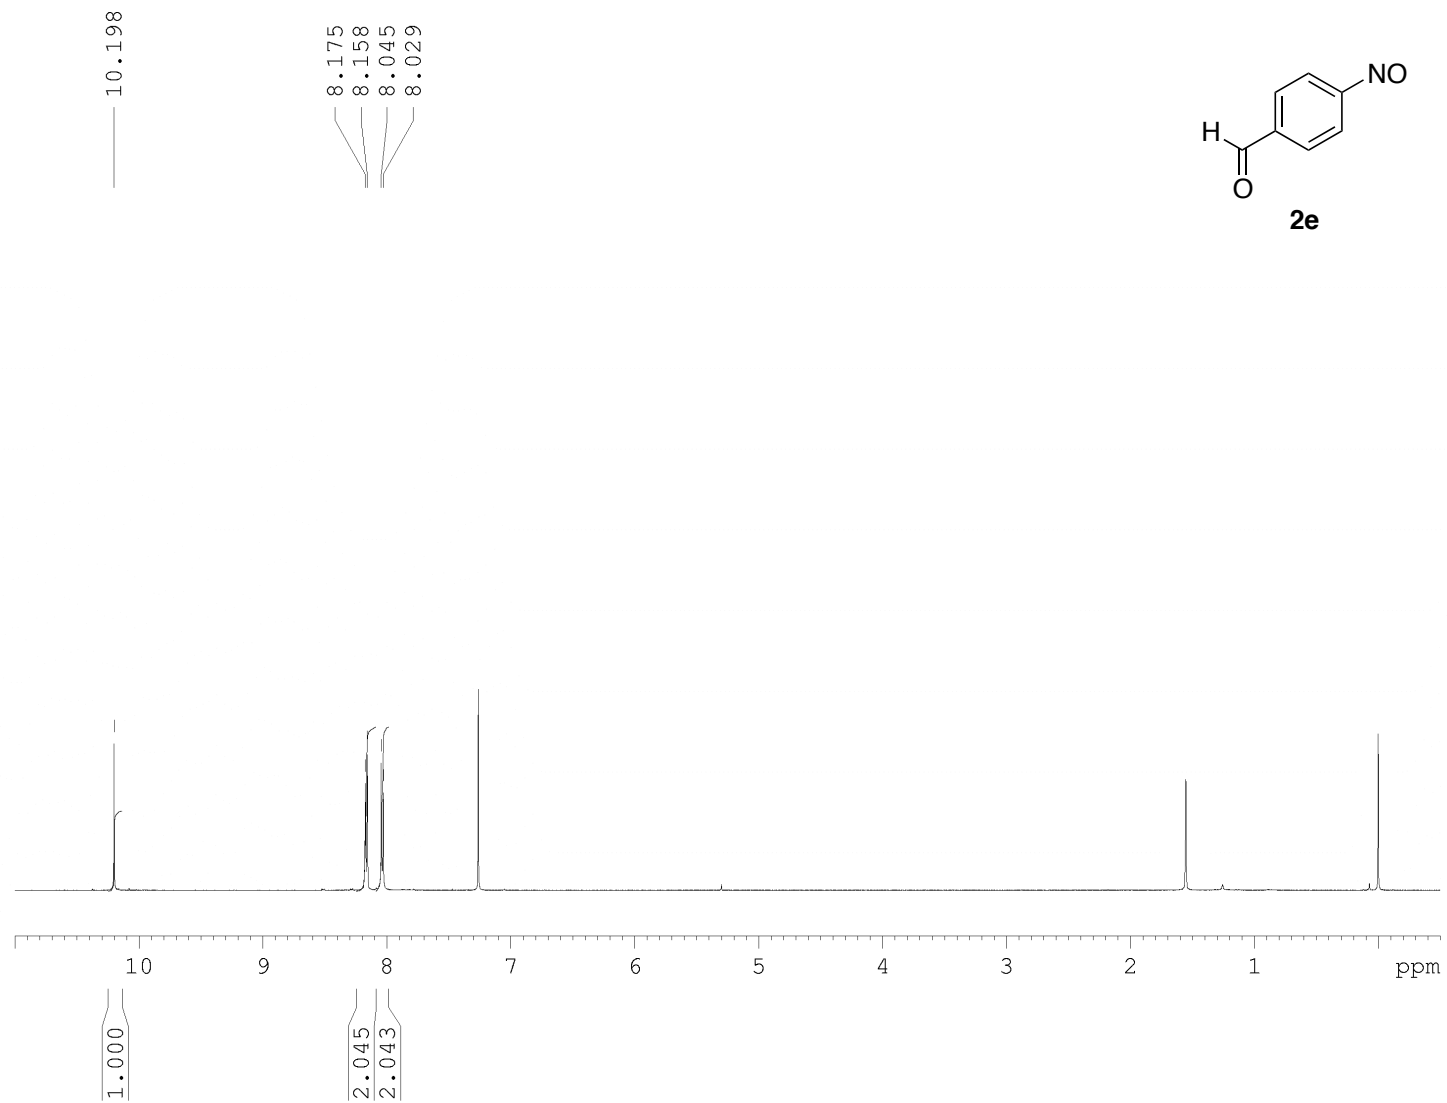

**<sup>1</sup>H NMR (500 MHz, CDCl<sub>3</sub>) Spectrum of 4-nitrosobenzaldehyde (2e)**

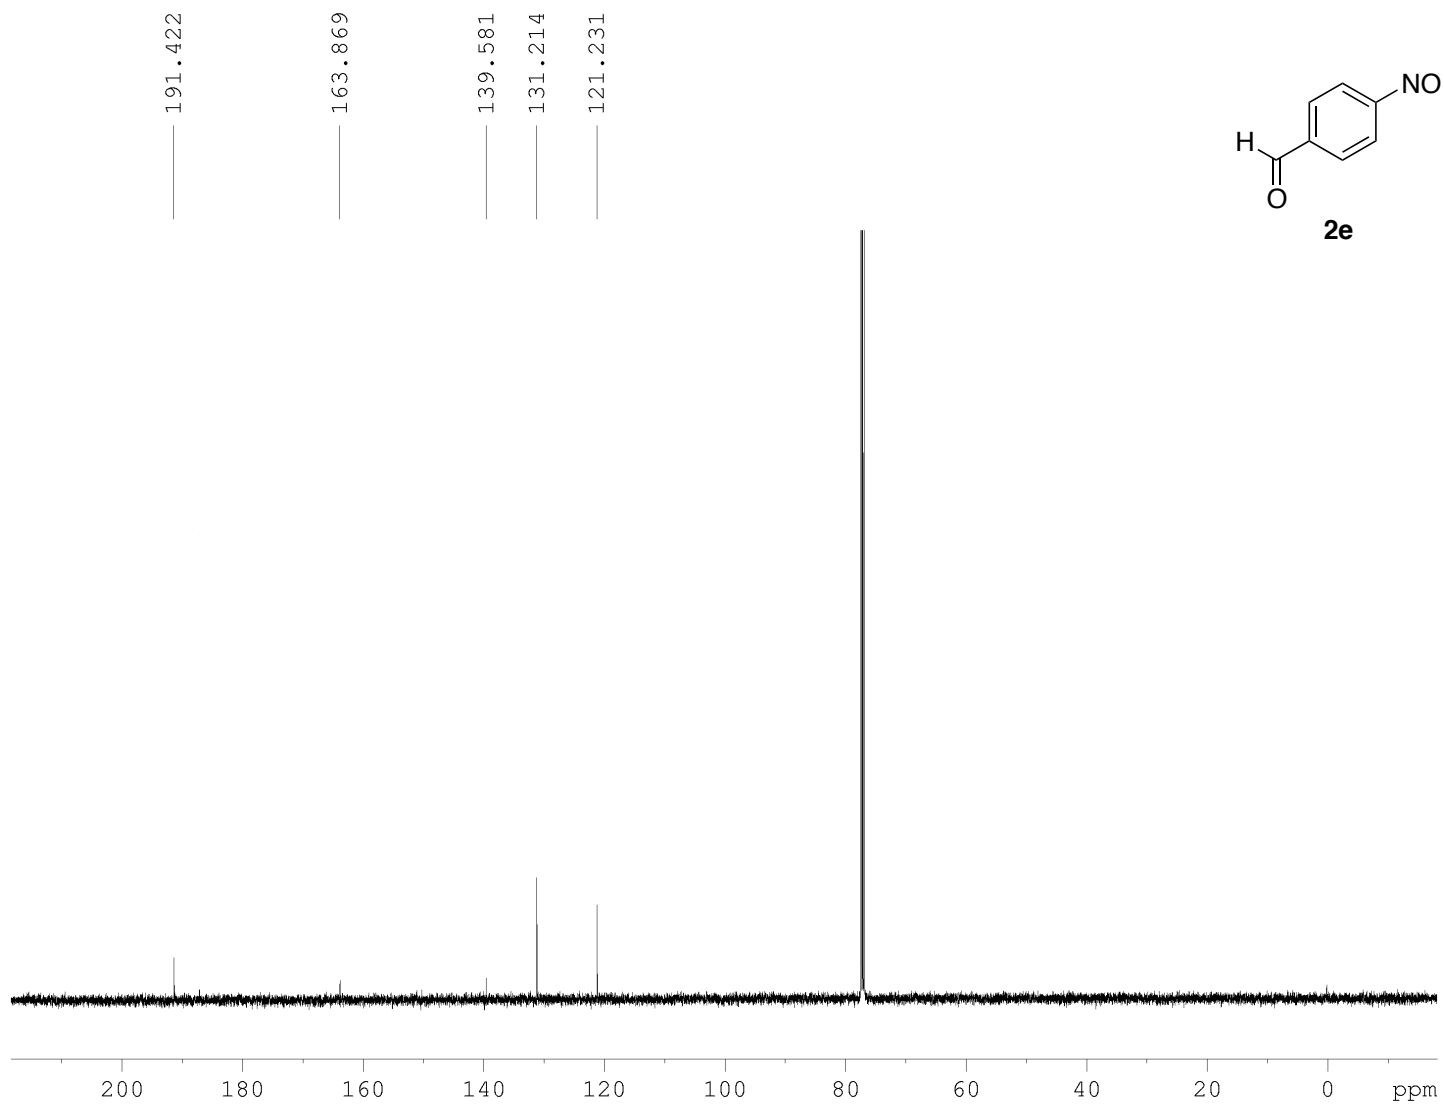

$^{13}\text{C}$  NMR (128.5 MHz,  $\text{CDCl}_3$ ) Spectrum of 4-nitrosobenzaldehyde (2e)

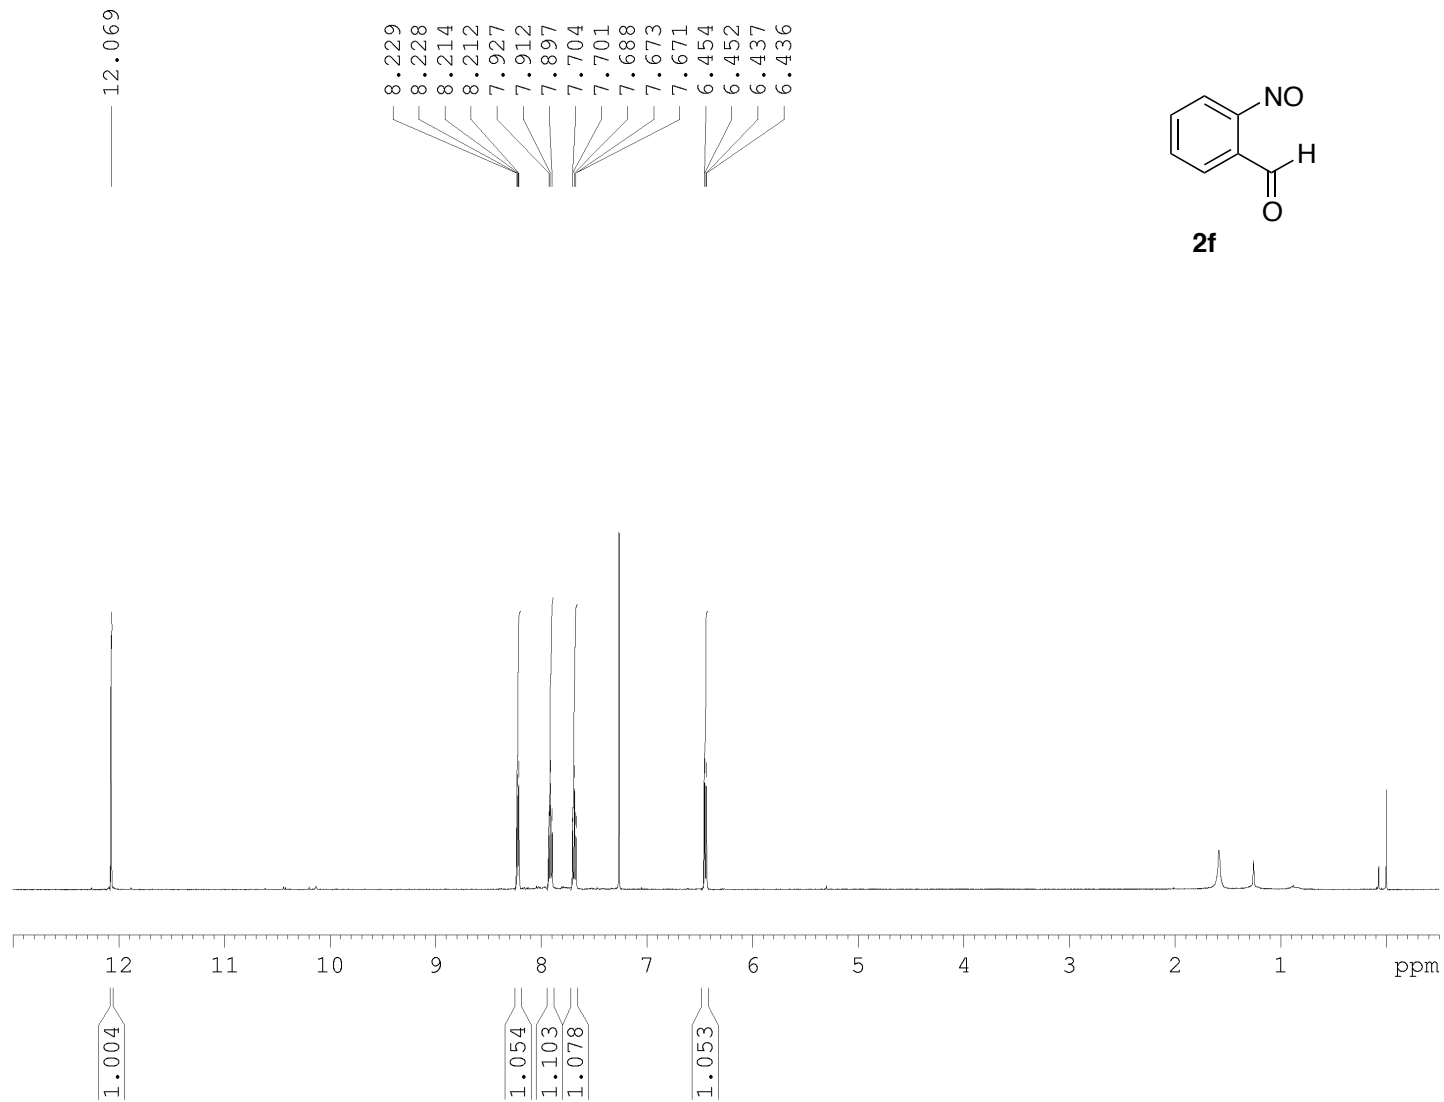

$^1\text{H}$  NMR (500 MHz,  $\text{CDCl}_3$ ) Spectrum of 2-nitrosobenzaldehyde (2f)

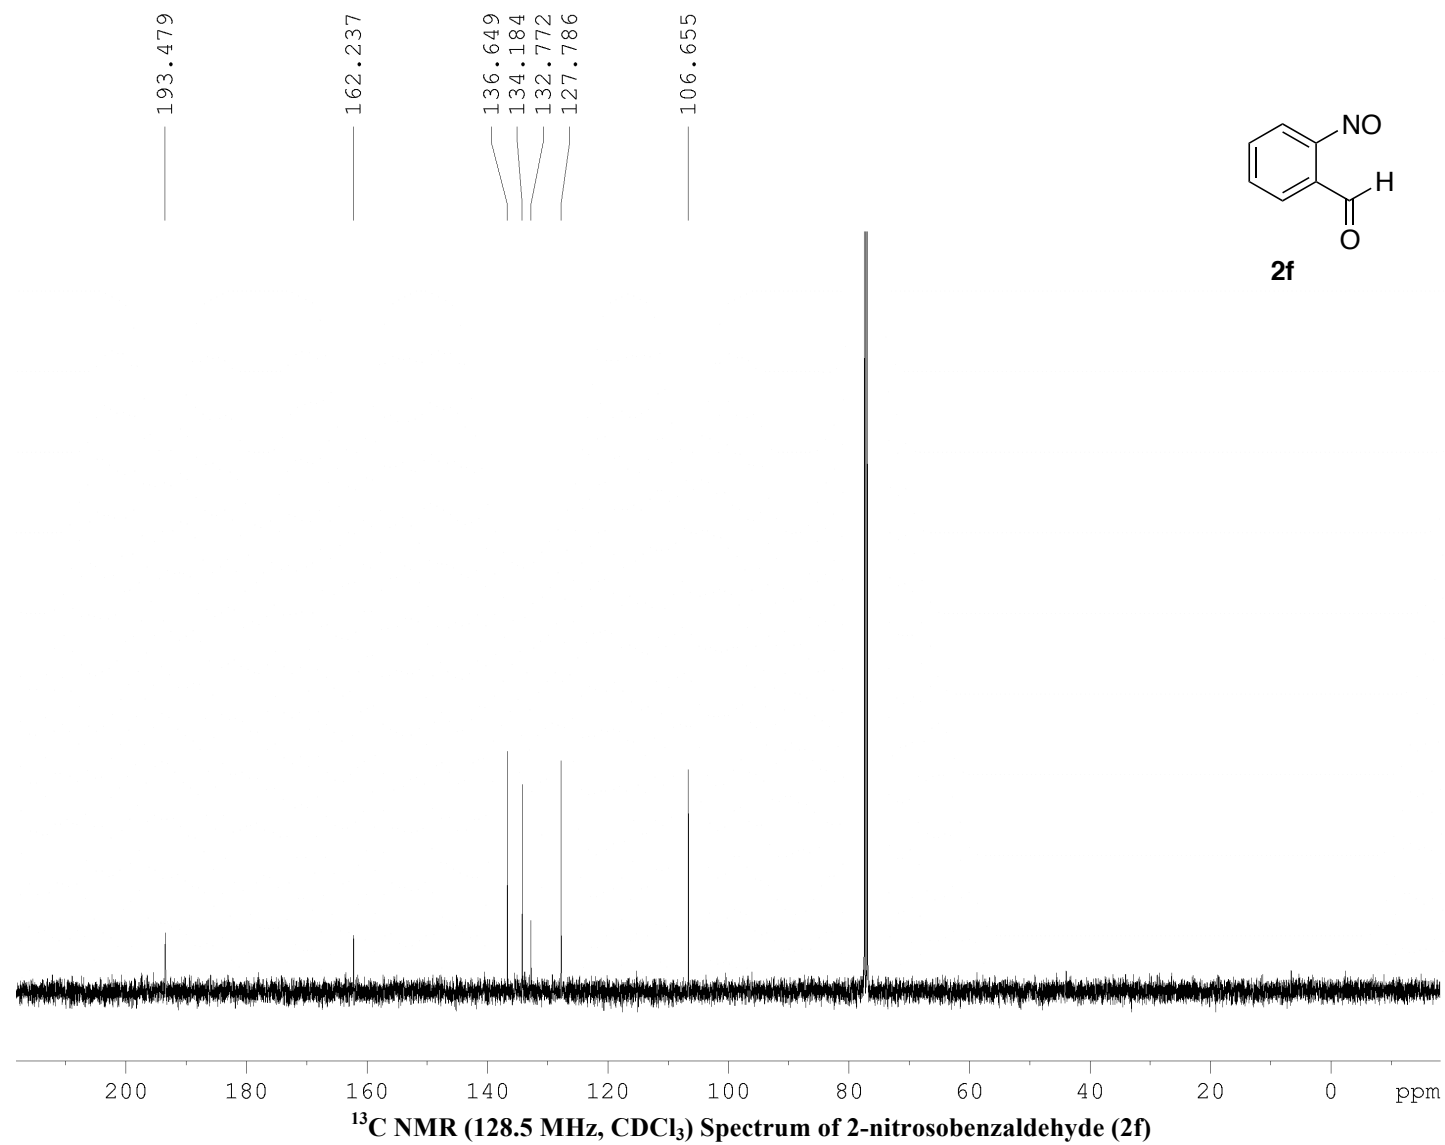

7.978  
7.975

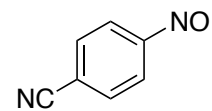

**2g**

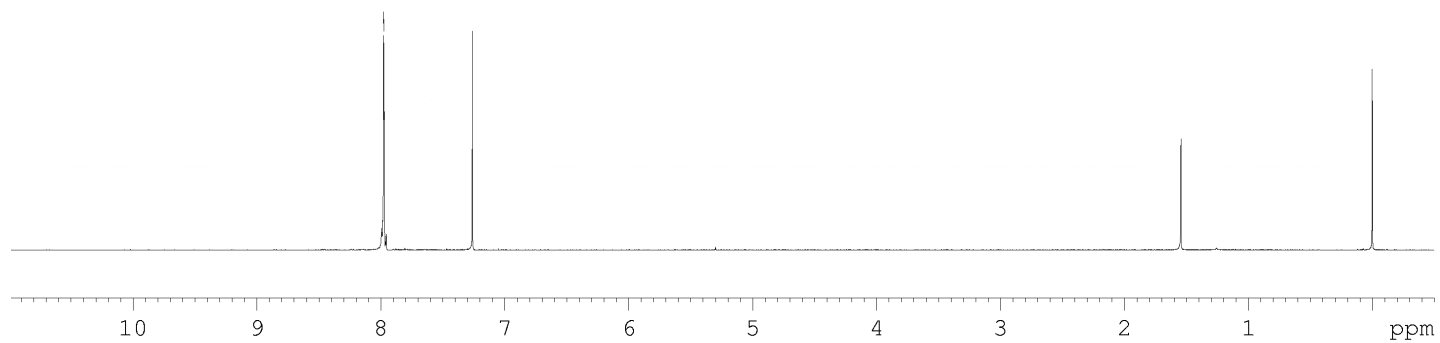

**<sup>1</sup>H NMR (500 MHz, CDCl<sub>3</sub>) Spectrum of 4-nitrosobenzonitrile (2g)**

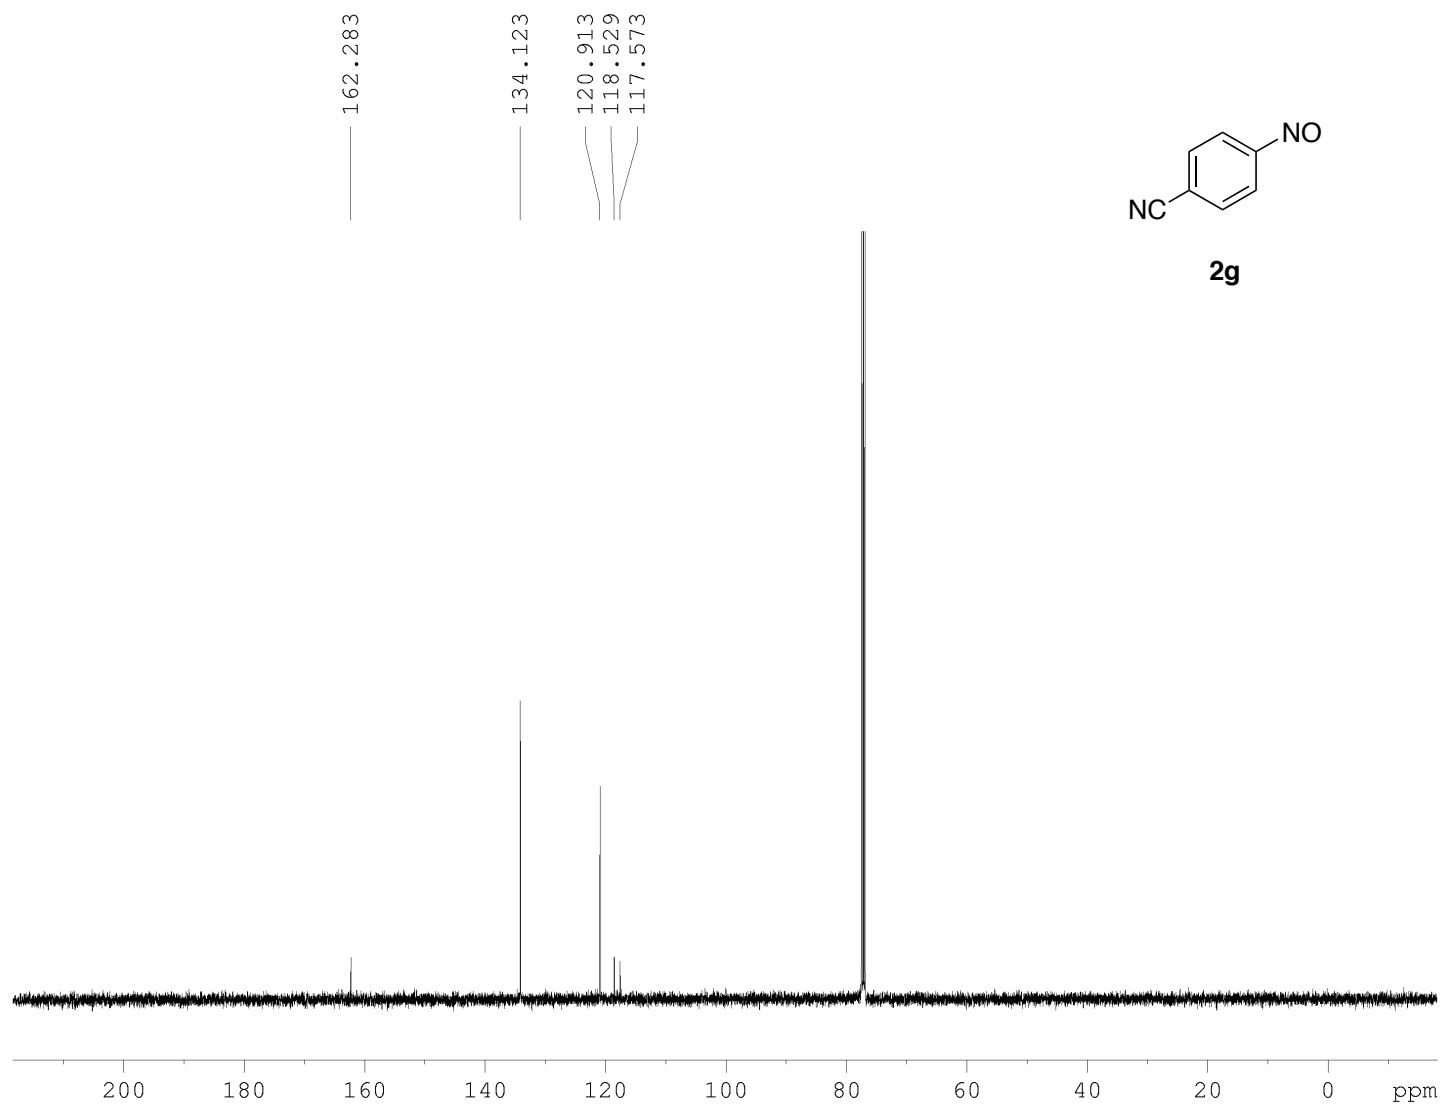

$^{13}\text{C}$  NMR (128.5 MHz,  $\text{CDCl}_3$ ) Spectrum of 4-nitrosobenzonitrile (2g)

7.980  
7.964  
7.852  
7.836  
7.788  
7.622  
7.607  
7.591  
7.550

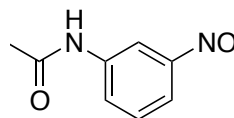

**2h**

2.243

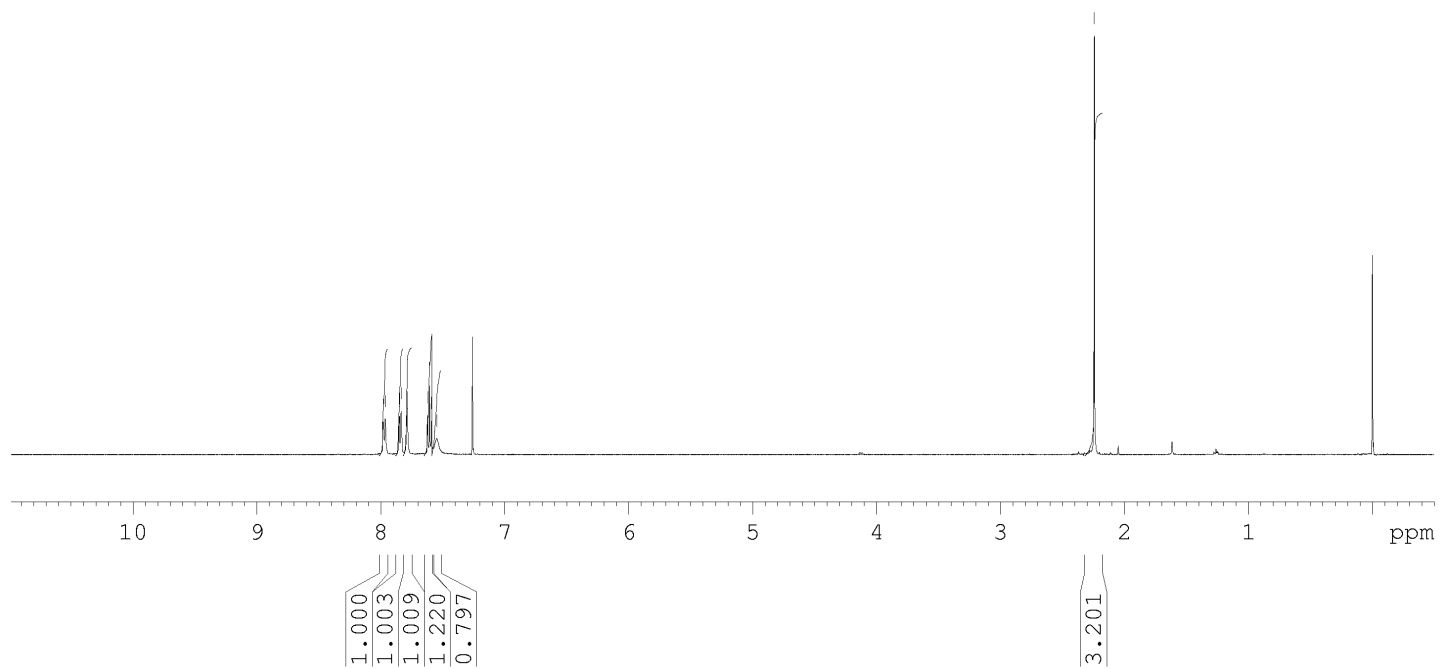

**<sup>1</sup>H NMR (500 MHz, CDCl<sub>3</sub>) Spectrum of *N*-(3-nitrosophenyl)acetamide (2h)**



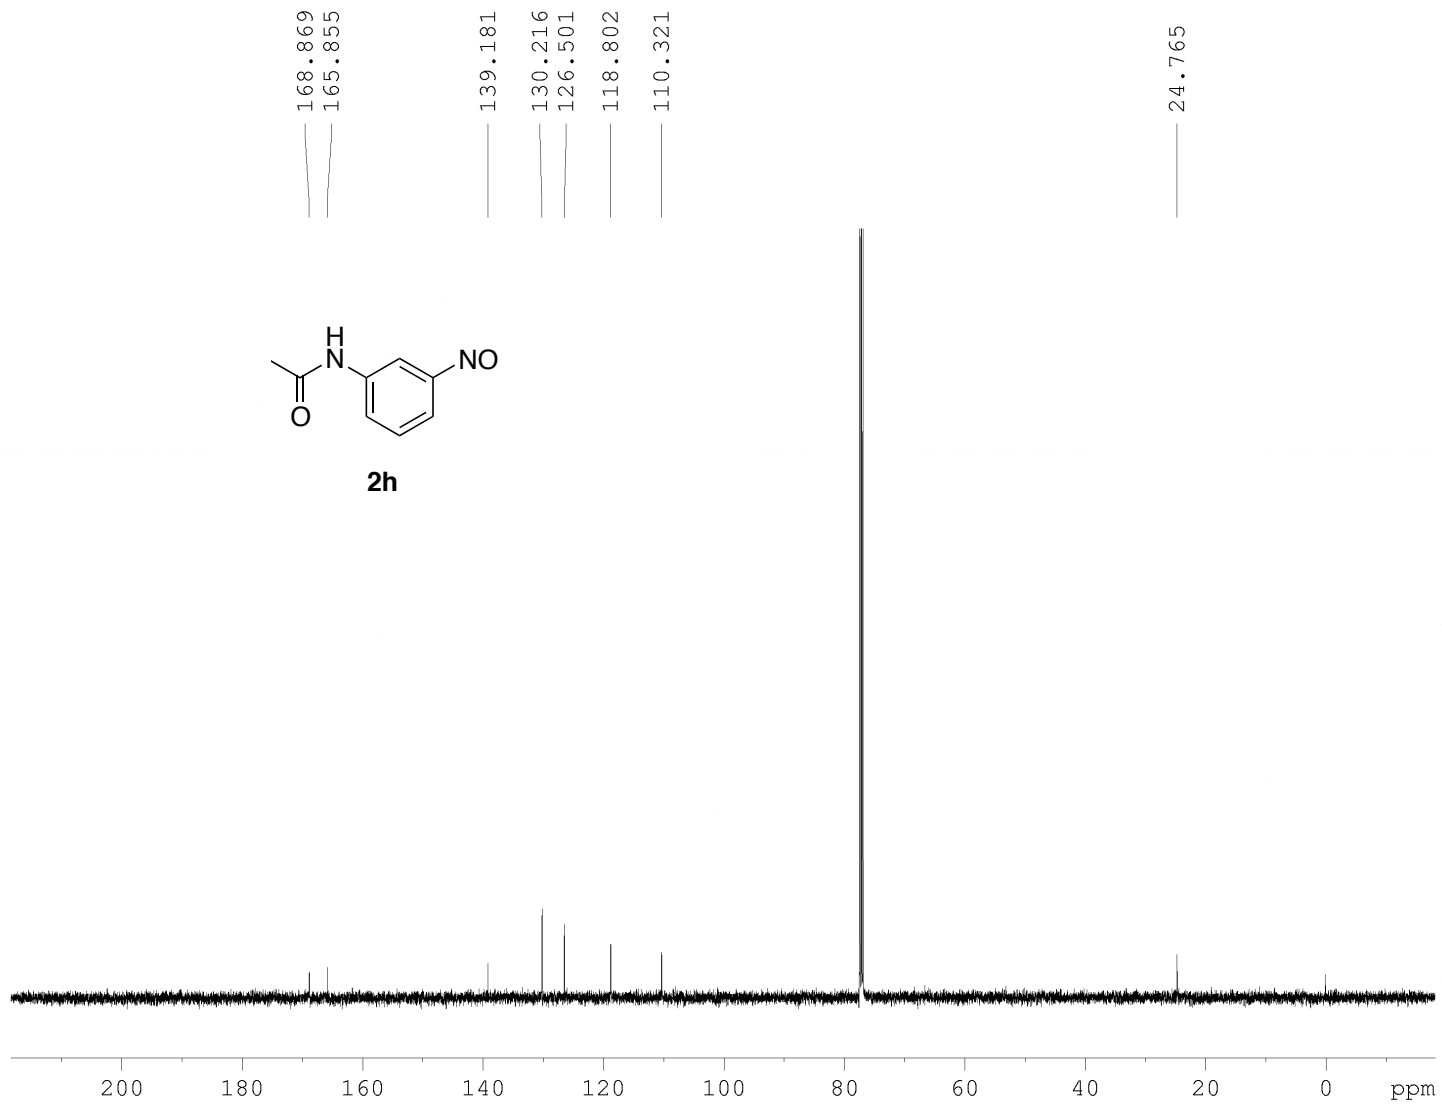

<sup>13</sup>C NMR (128.5 MHz, CDCl<sub>3</sub>) Spectrum of *N*-(3-nitrosophenyl)acetamide (2h)

9.301  
9.297  
9.294  
9.093  
8.790  
8.786  
8.783

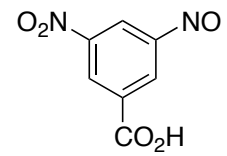

**2i**

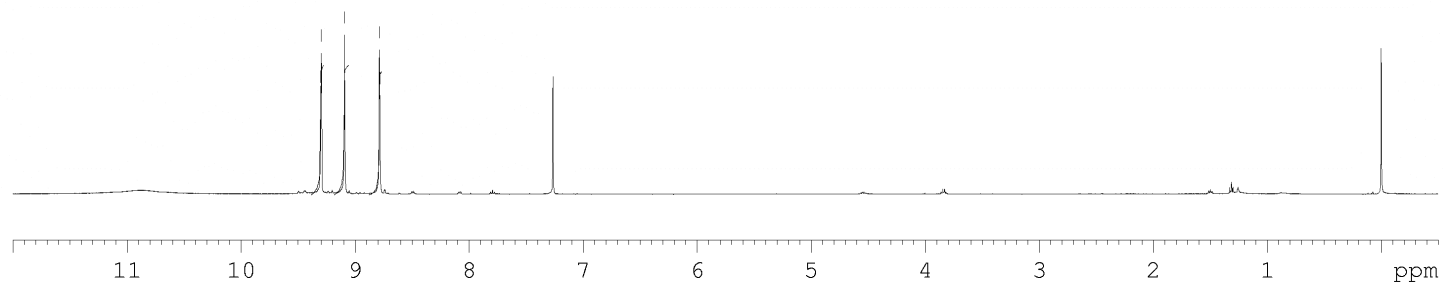

1.000  
1.005  
0.953

**<sup>1</sup>H NMR (500 MHz, CDCl<sub>3</sub>) Spectrum of 3-nitro-5-nitrosobenzoic acid (2i)**

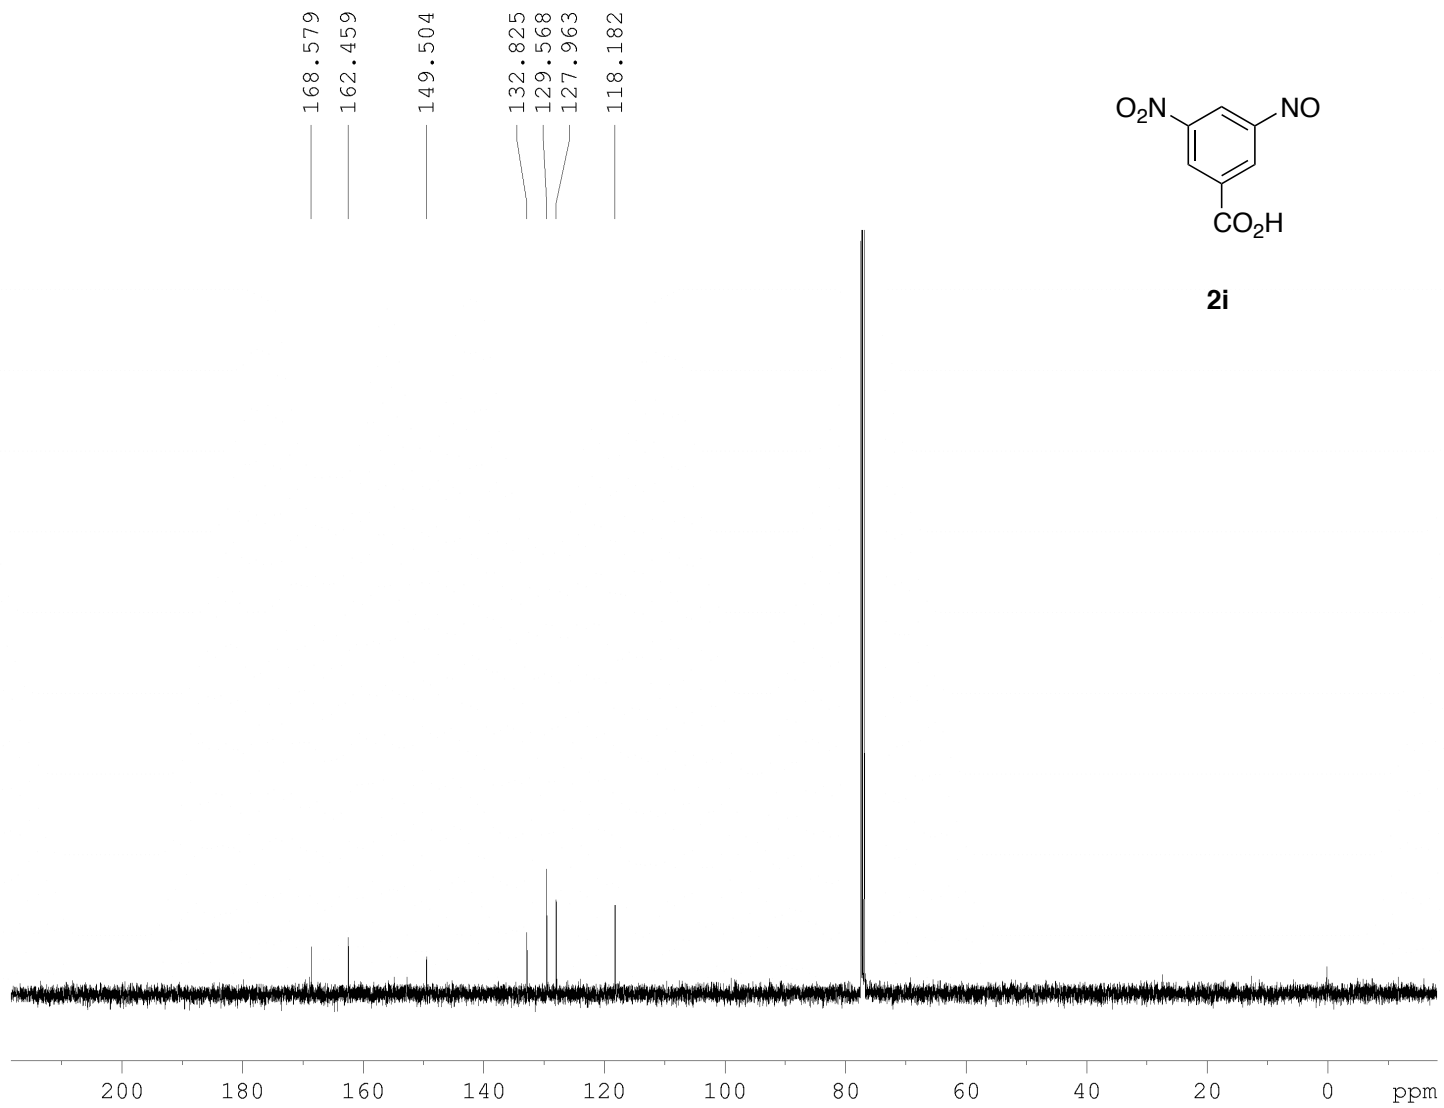

$^{13}\text{C}$  NMR (128.5 MHz,  $\text{CDCl}_3$ ) Spectrum of 3-nitro-5-nitrosobenzoic acid (2i)

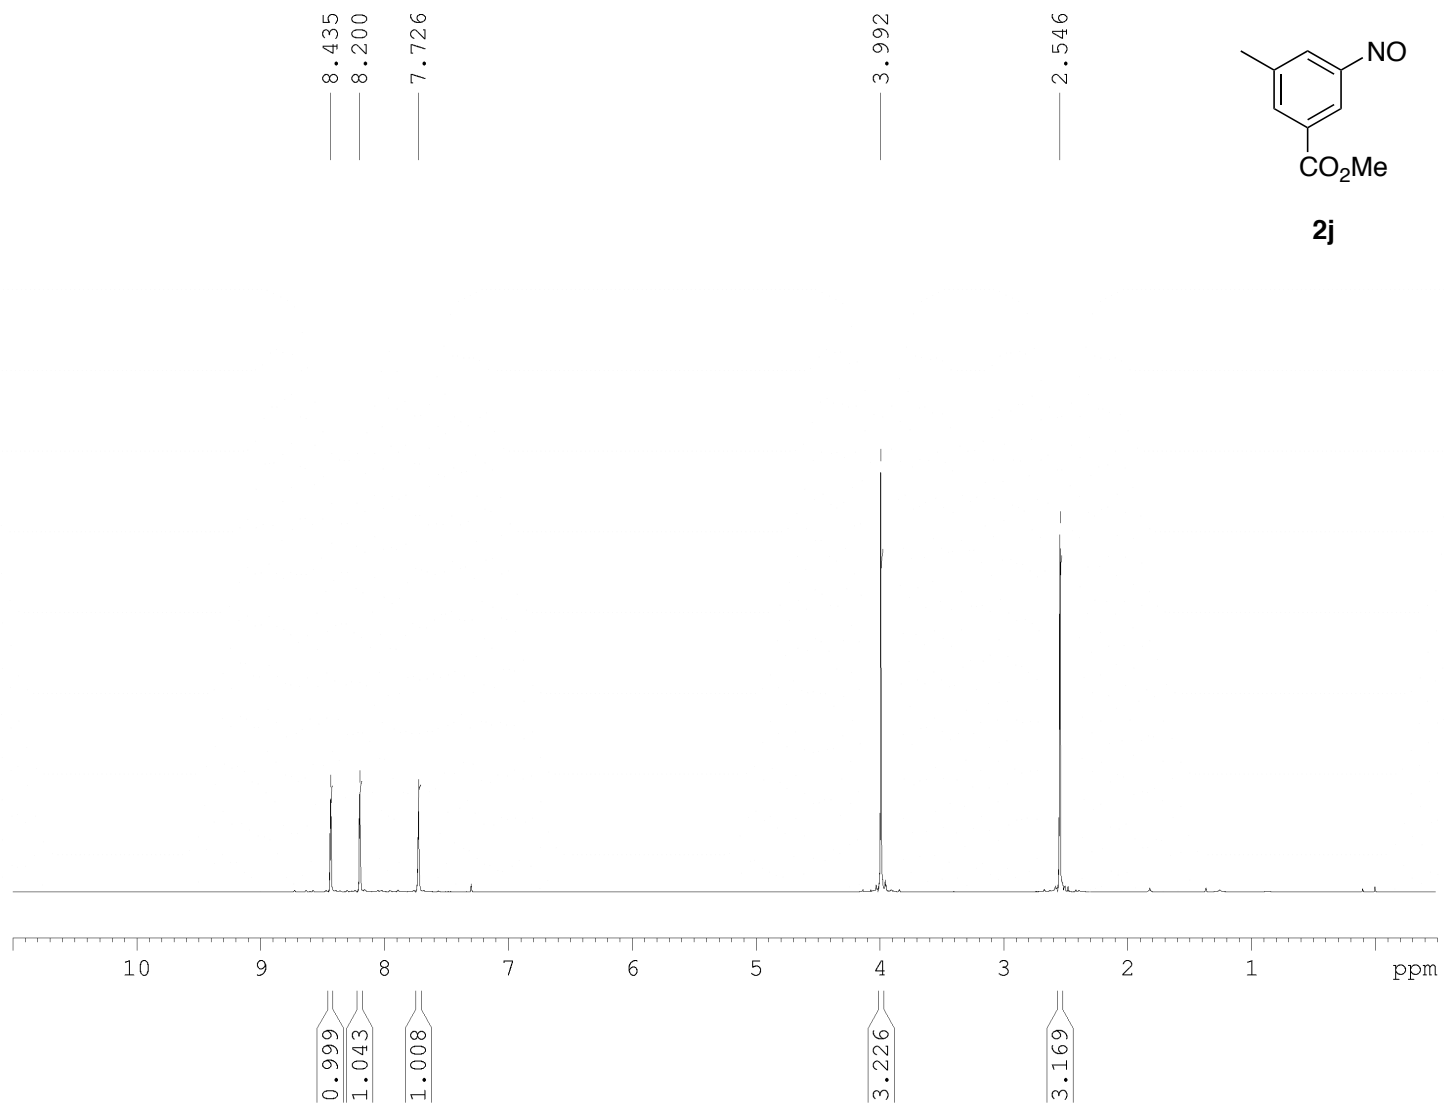

<sup>1</sup>H NMR (500 MHz, CDCl<sub>3</sub>) Spectrum of methyl 3-methyl-5-nitrosobenzoate (2j)

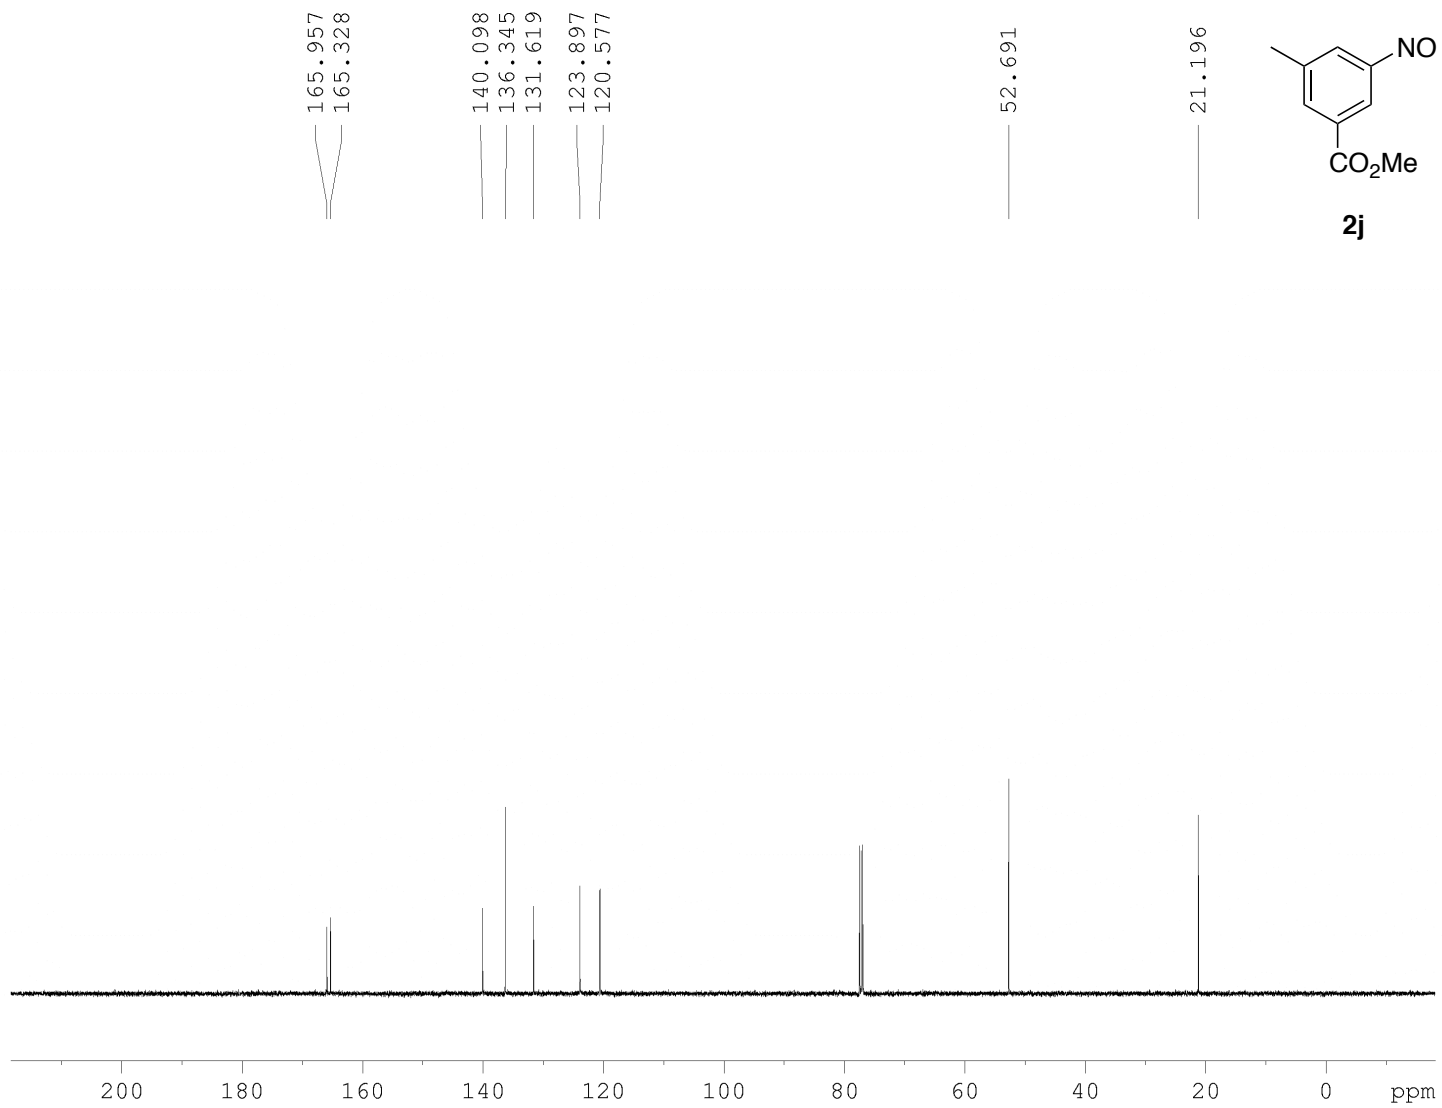

<sup>13</sup>C NMR (128.5 MHz, CDCl<sub>3</sub>) Spectrum of methyl 3-methyl-5-nitrosobenzoate (2j)

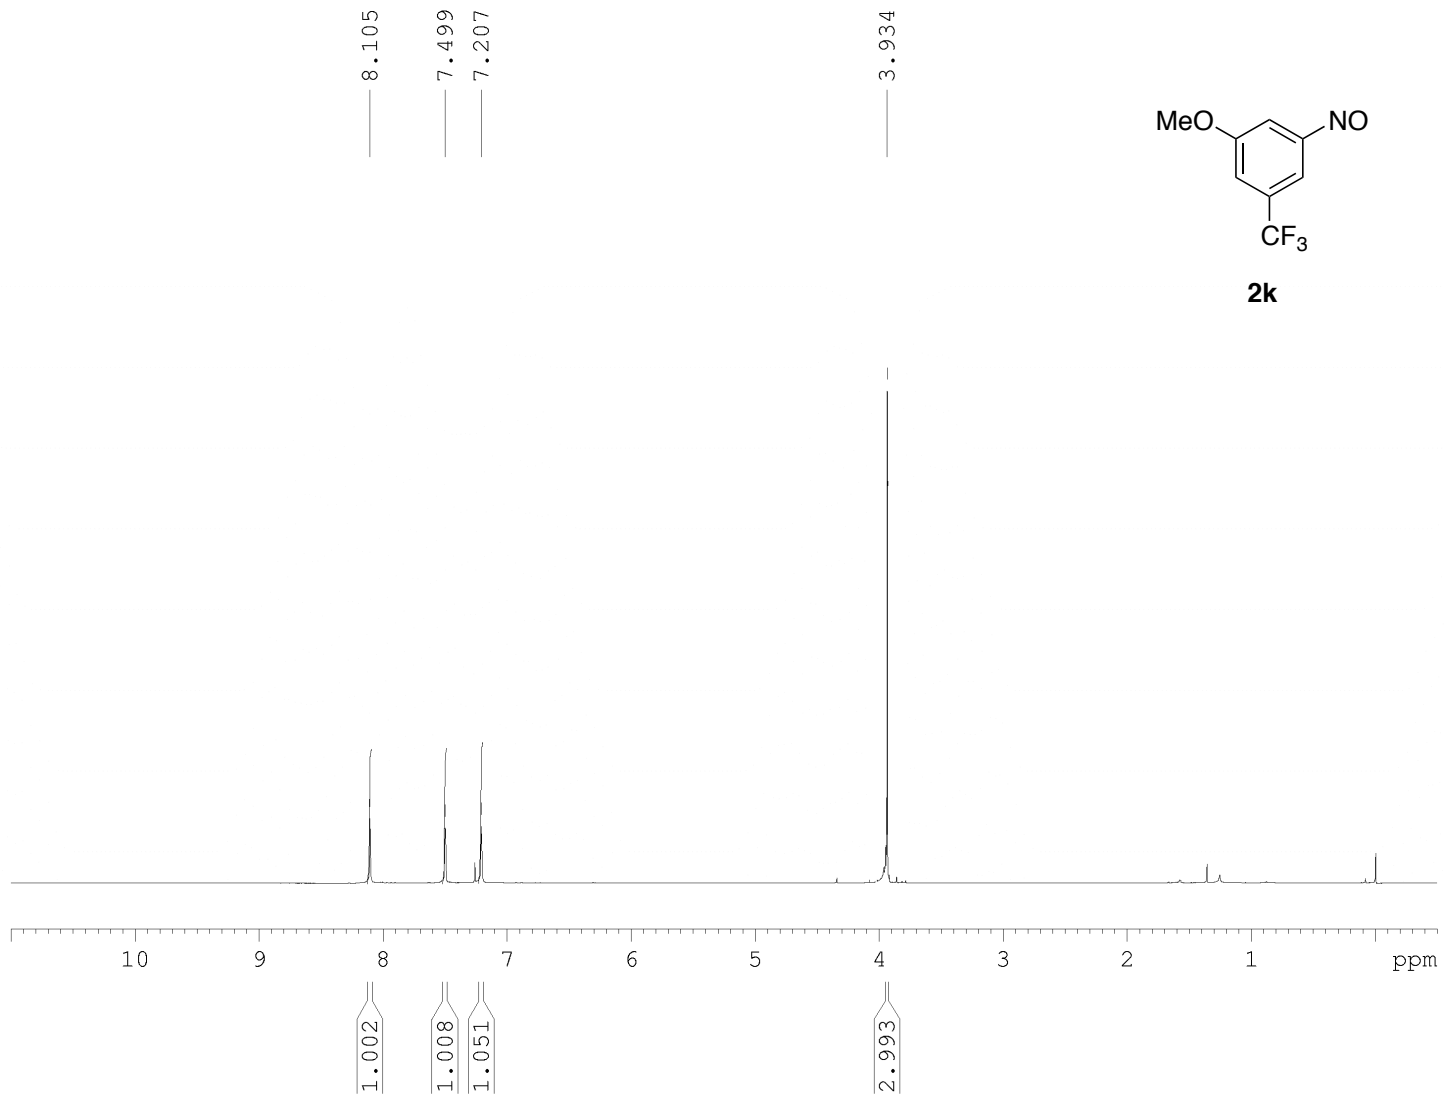

<sup>1</sup>H NMR (500 MHz, CDCl<sub>3</sub>) Spectrum of 1-methoxy-3-nitroso-5-(trifluoromethyl)benzene (2k)

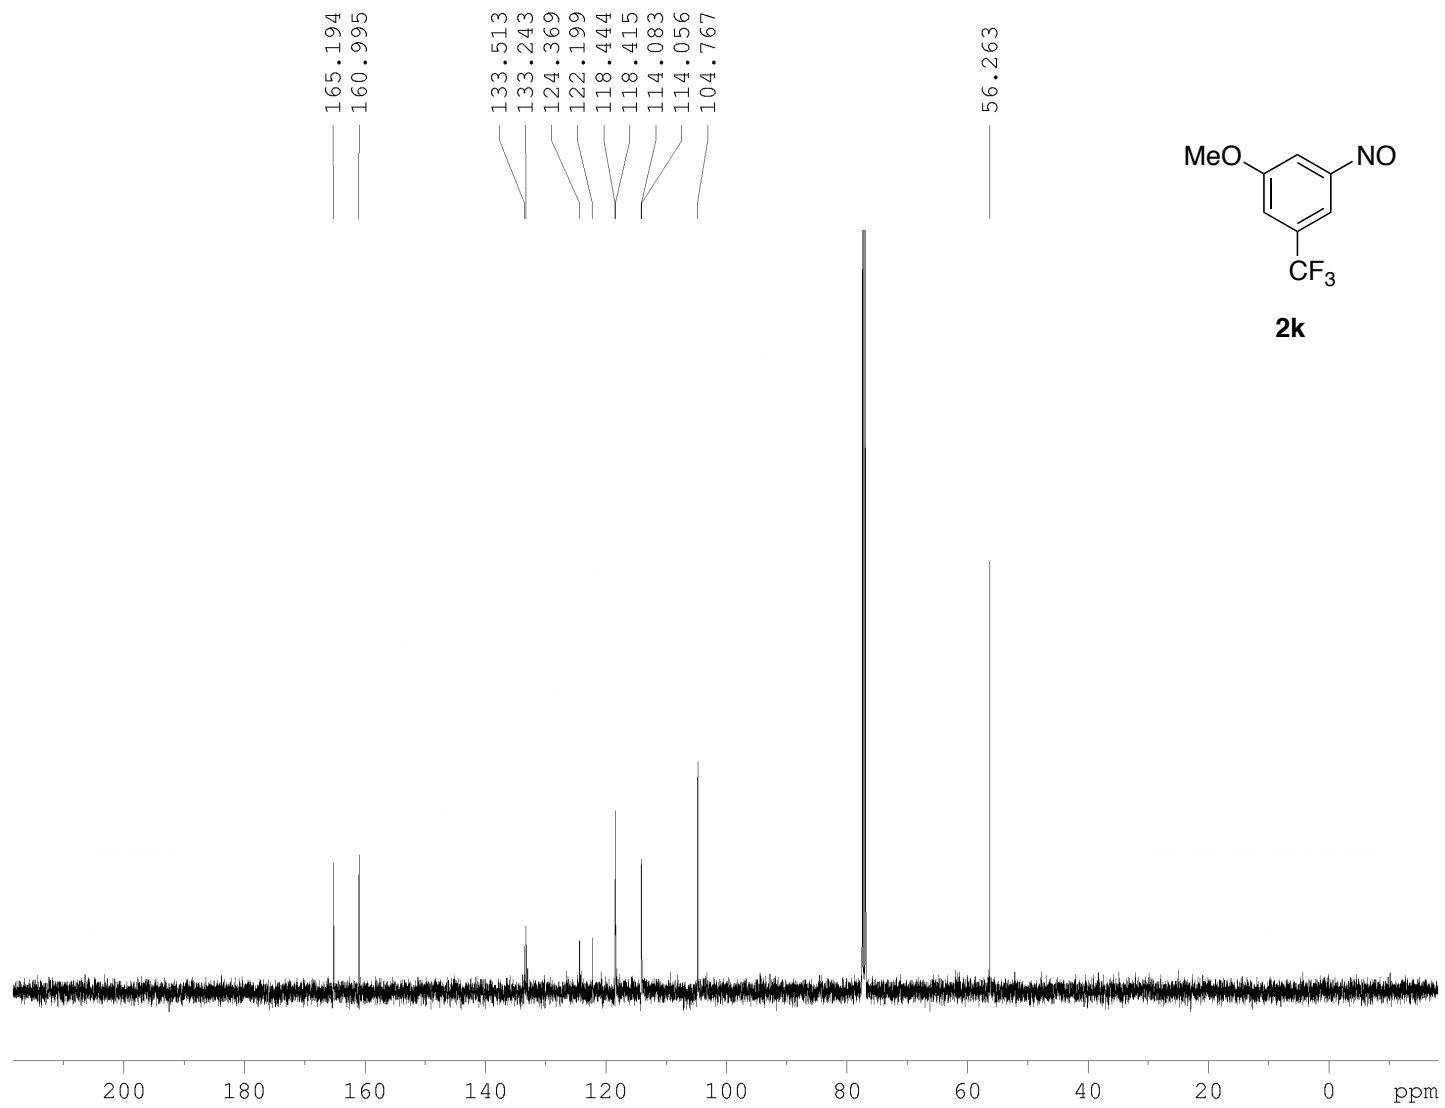

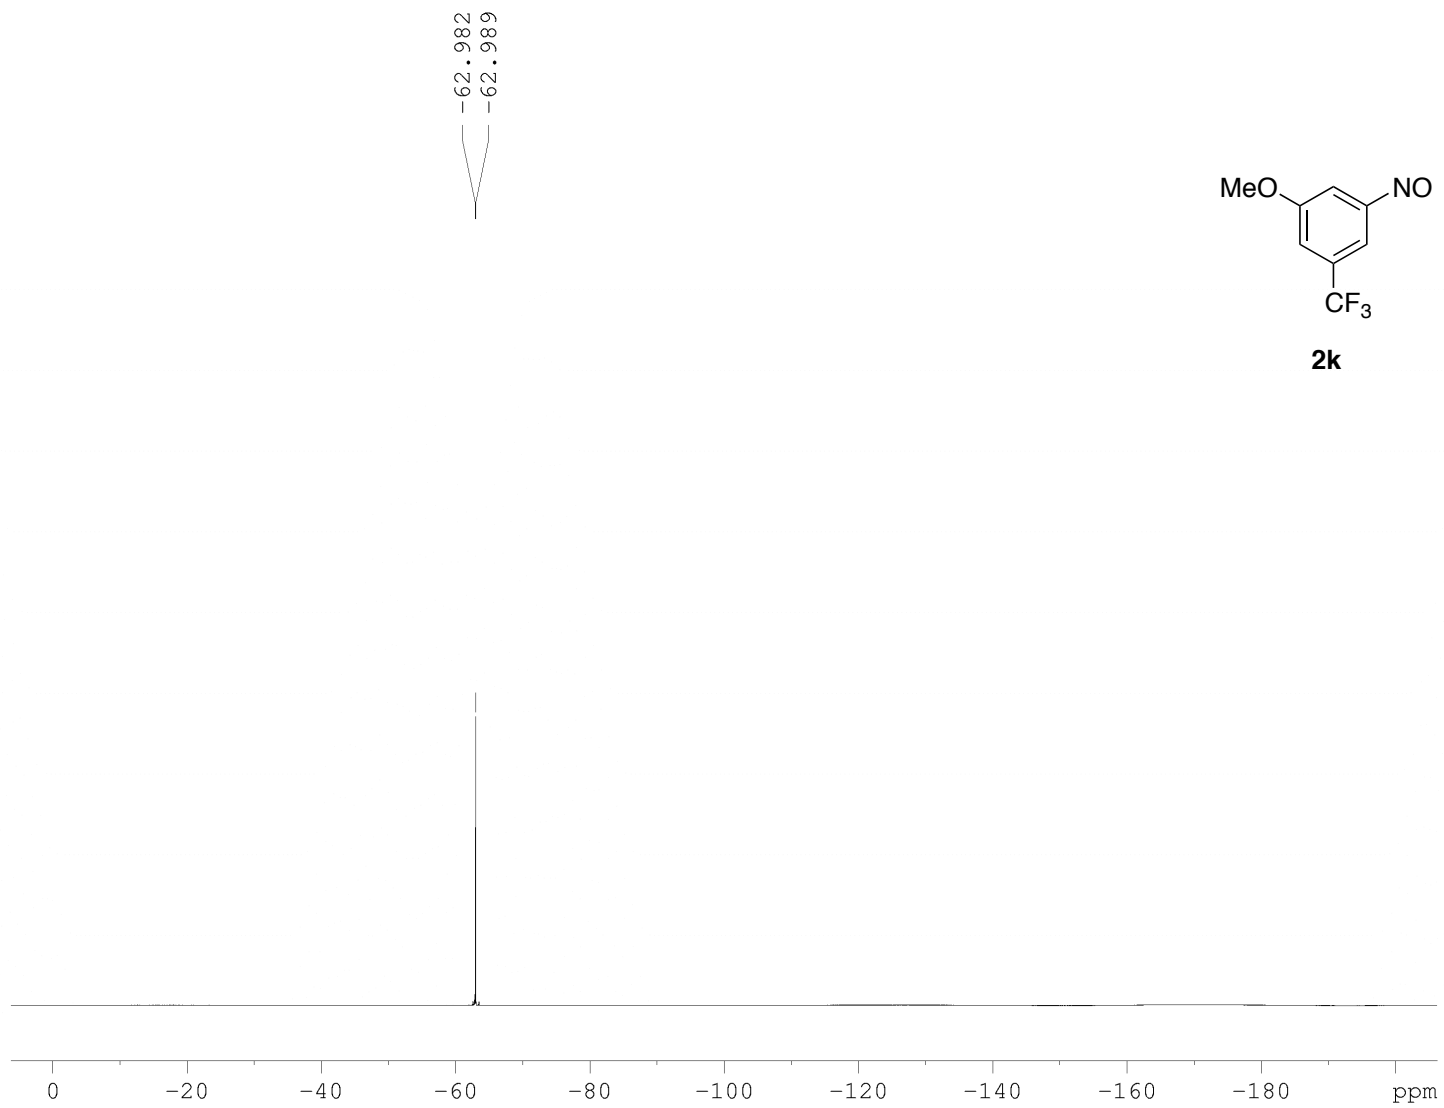



8.043  
8.026  
7.613  
7.596

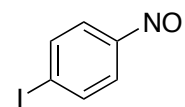

**21**

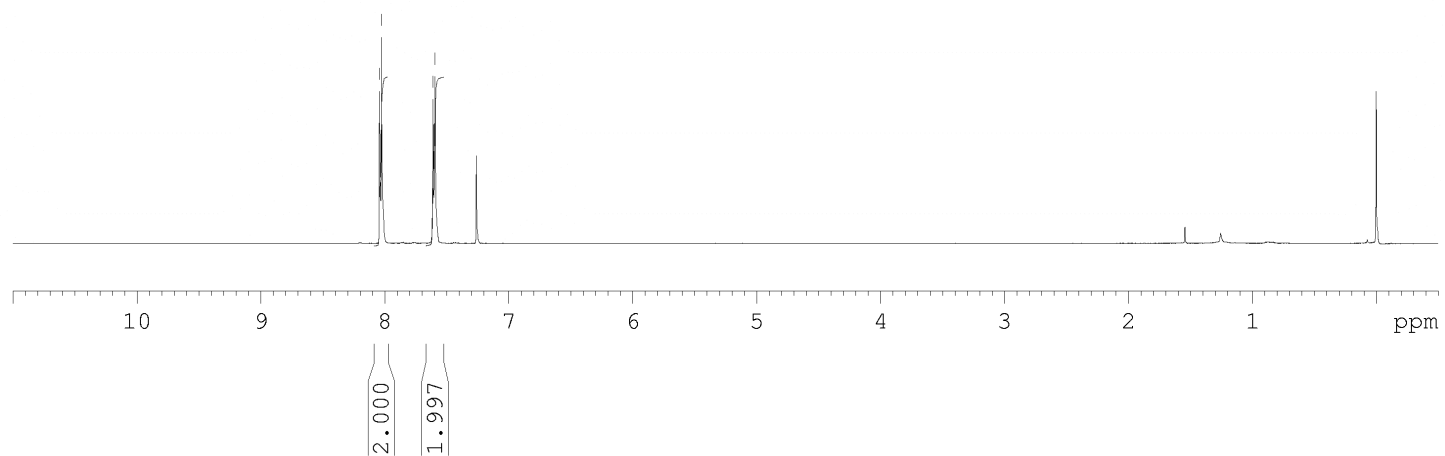

<sup>1</sup>H NMR (500 MHz, CDCl<sub>3</sub>) Spectrum of 1-iodo-4-nitrosobenzene (21)

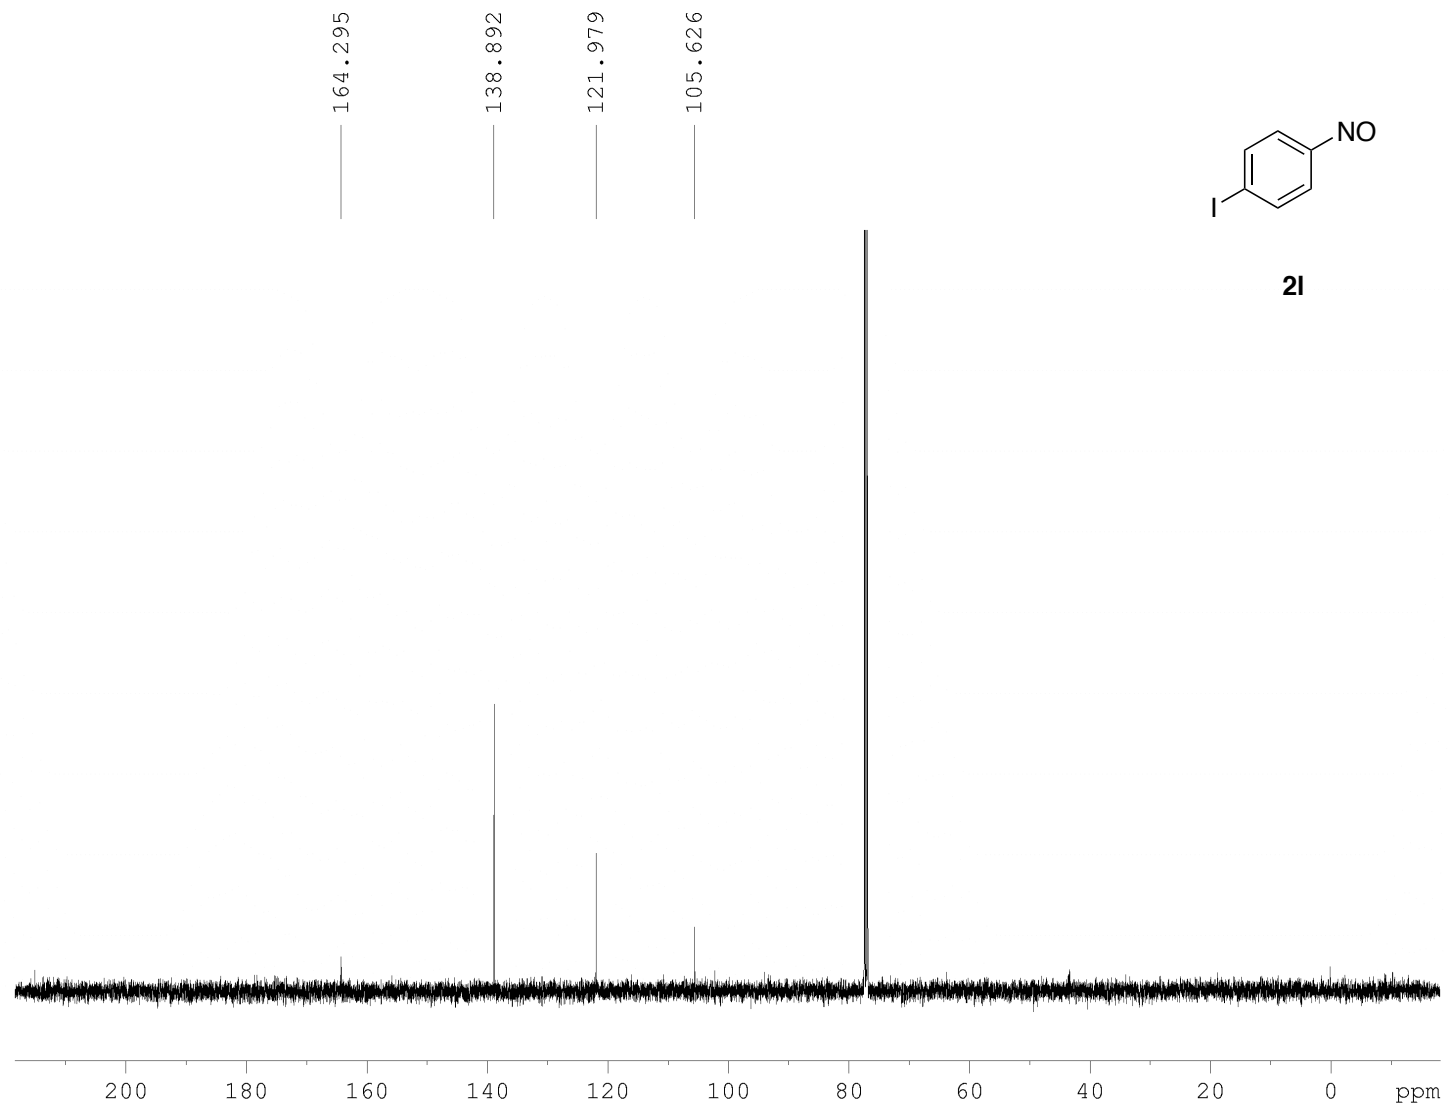

$^{13}\text{C}$  NMR (128.5 MHz,  $\text{CDCl}_3$ ) Spectrum of 1-iodo-4-nitrosobenzene (21).

7.782  
7.778

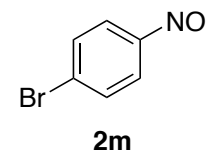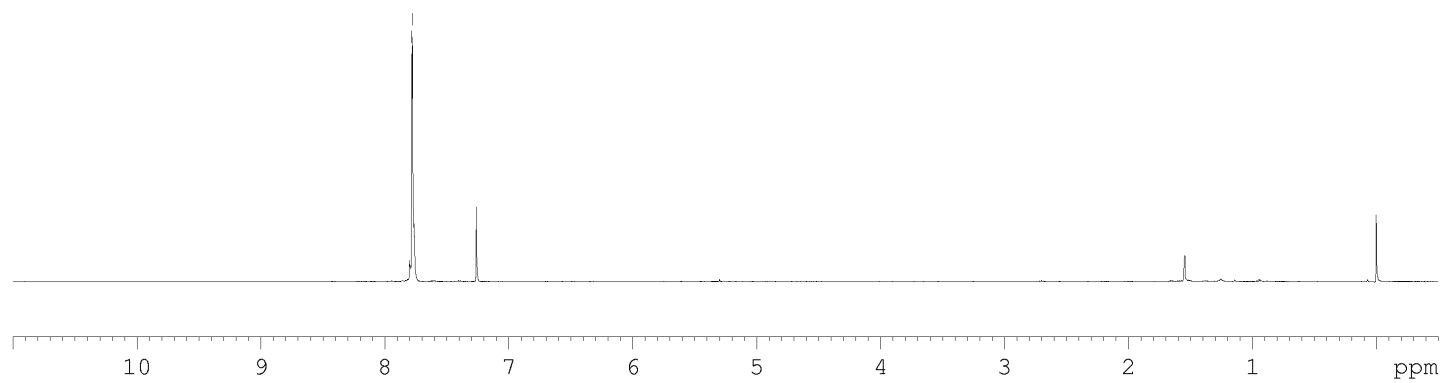

**<sup>1</sup>H NMR (500 MHz, CDCl<sub>3</sub>) Spectrum of 1-bromo-4-nitrosobenzene (2m)**

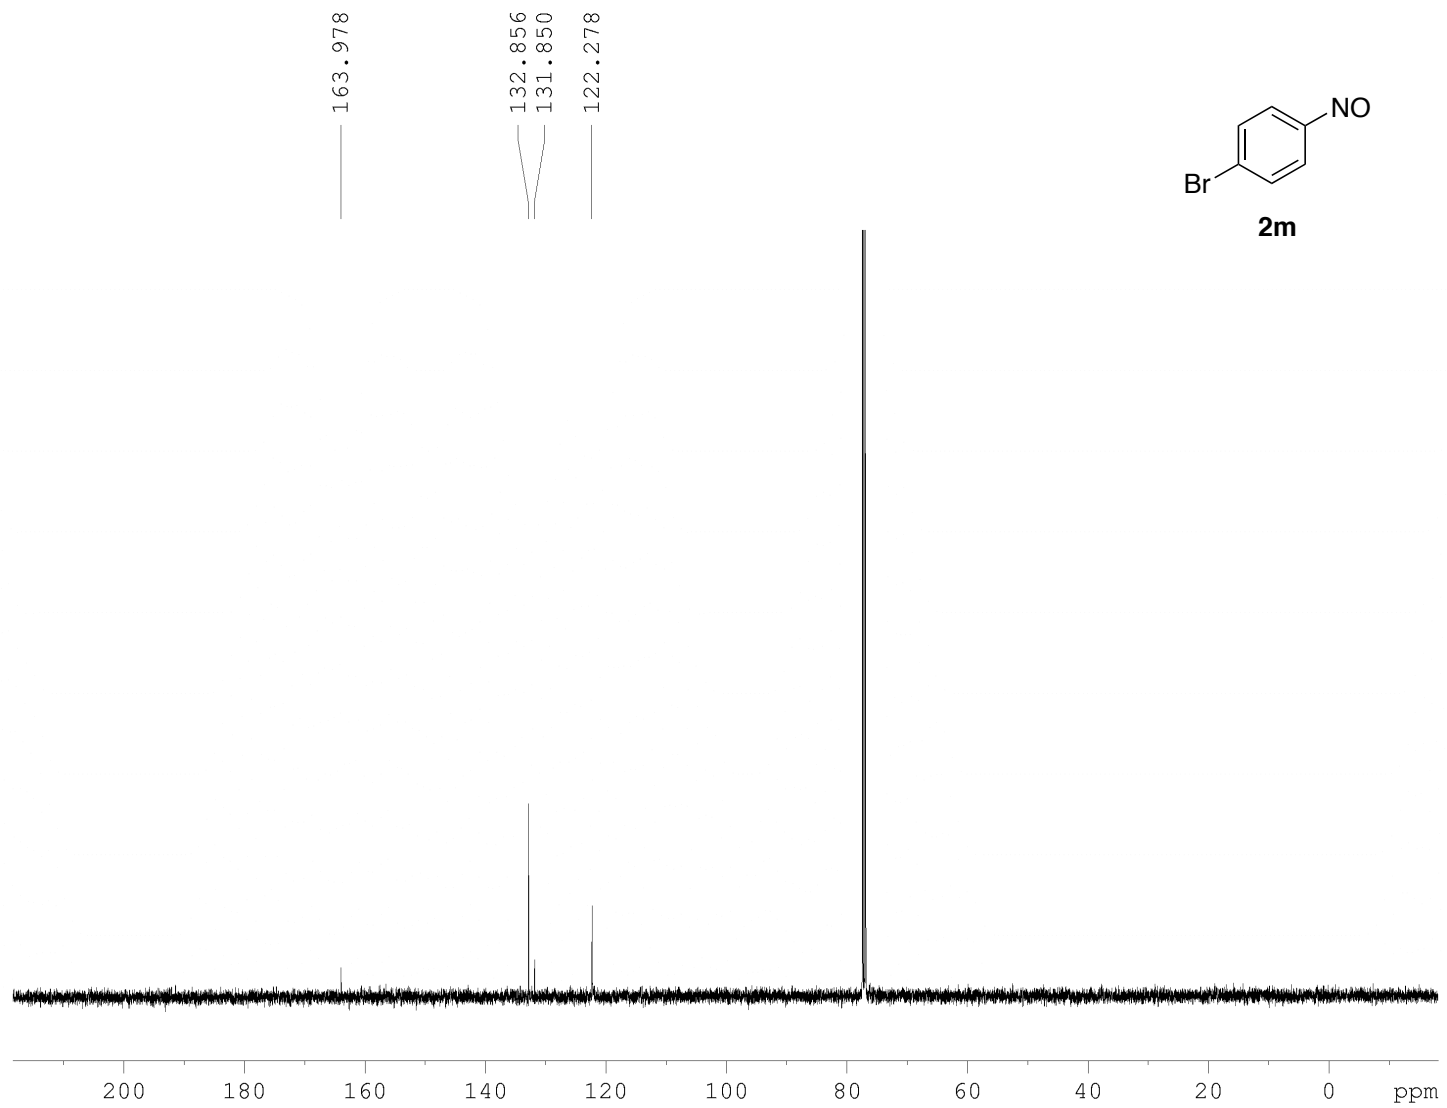

$^{13}\text{C}$  NMR (128.5 MHz,  $\text{CDCl}_3$ ) Spectrum of 1-bromo-4-nitrosobenzene (2m)

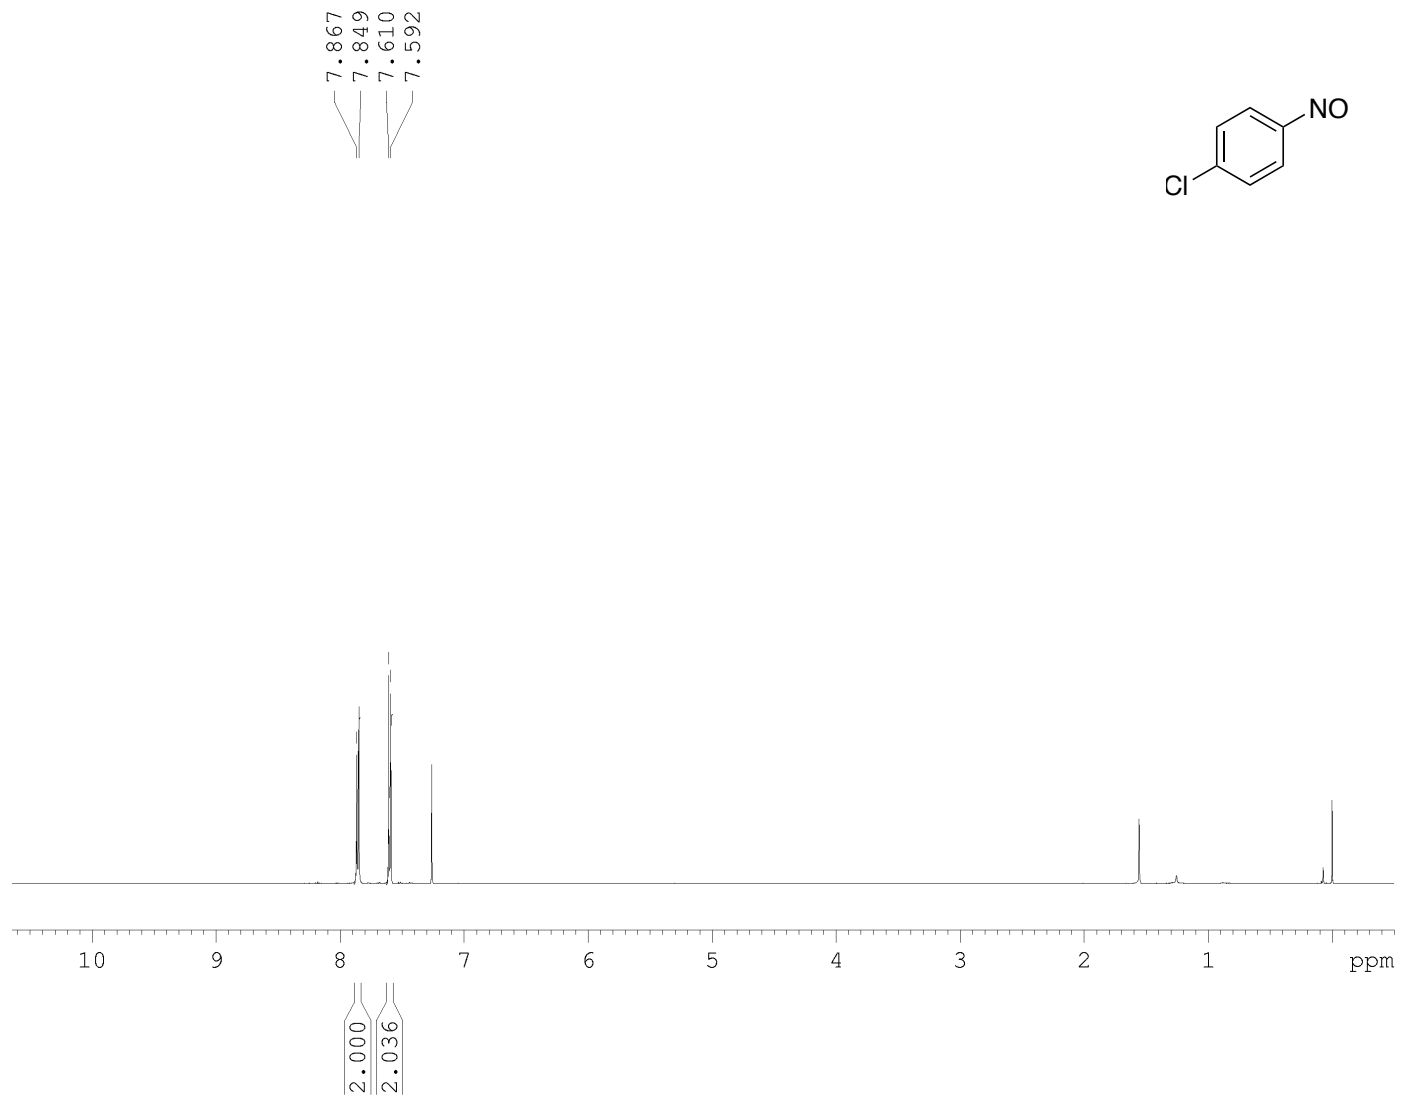

$^1\text{H}$  NMR (500 MHz,  $\text{CDCl}_3$ ) Spectrum of 1-chloro-4-nitrosobenzene (2n)

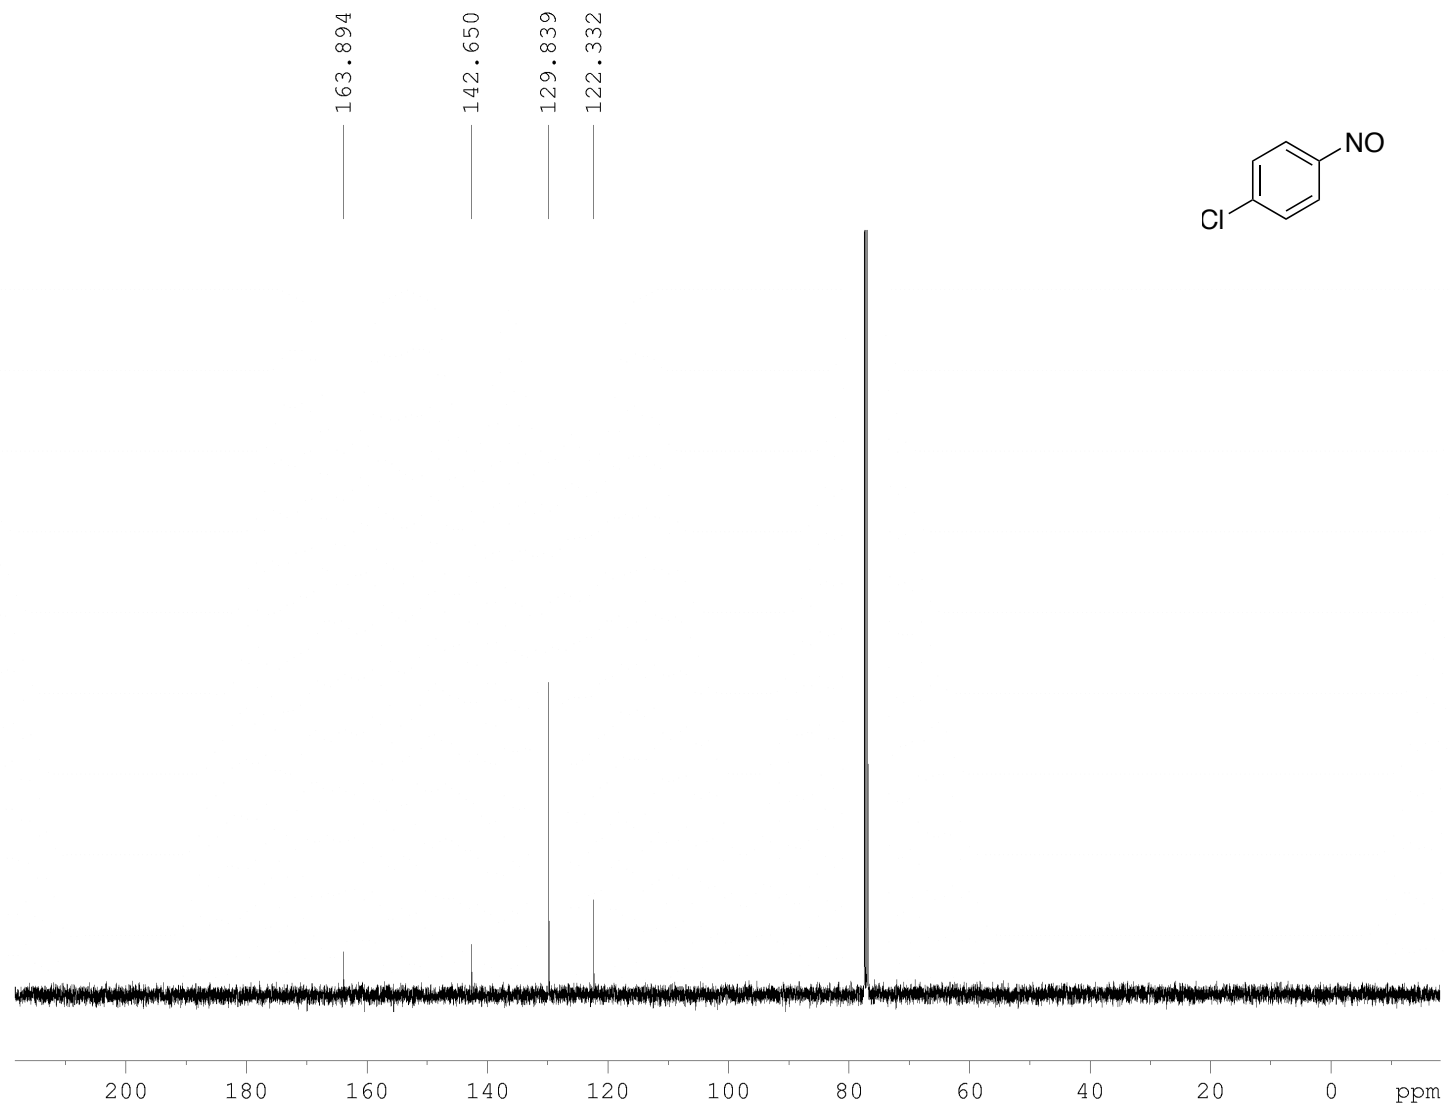

$^{13}\text{C}$  NMR (128.5 MHz,  $\text{CDCl}_3$ ) Spectrum of 1-chloro-4-nitrosobenzene (2n)

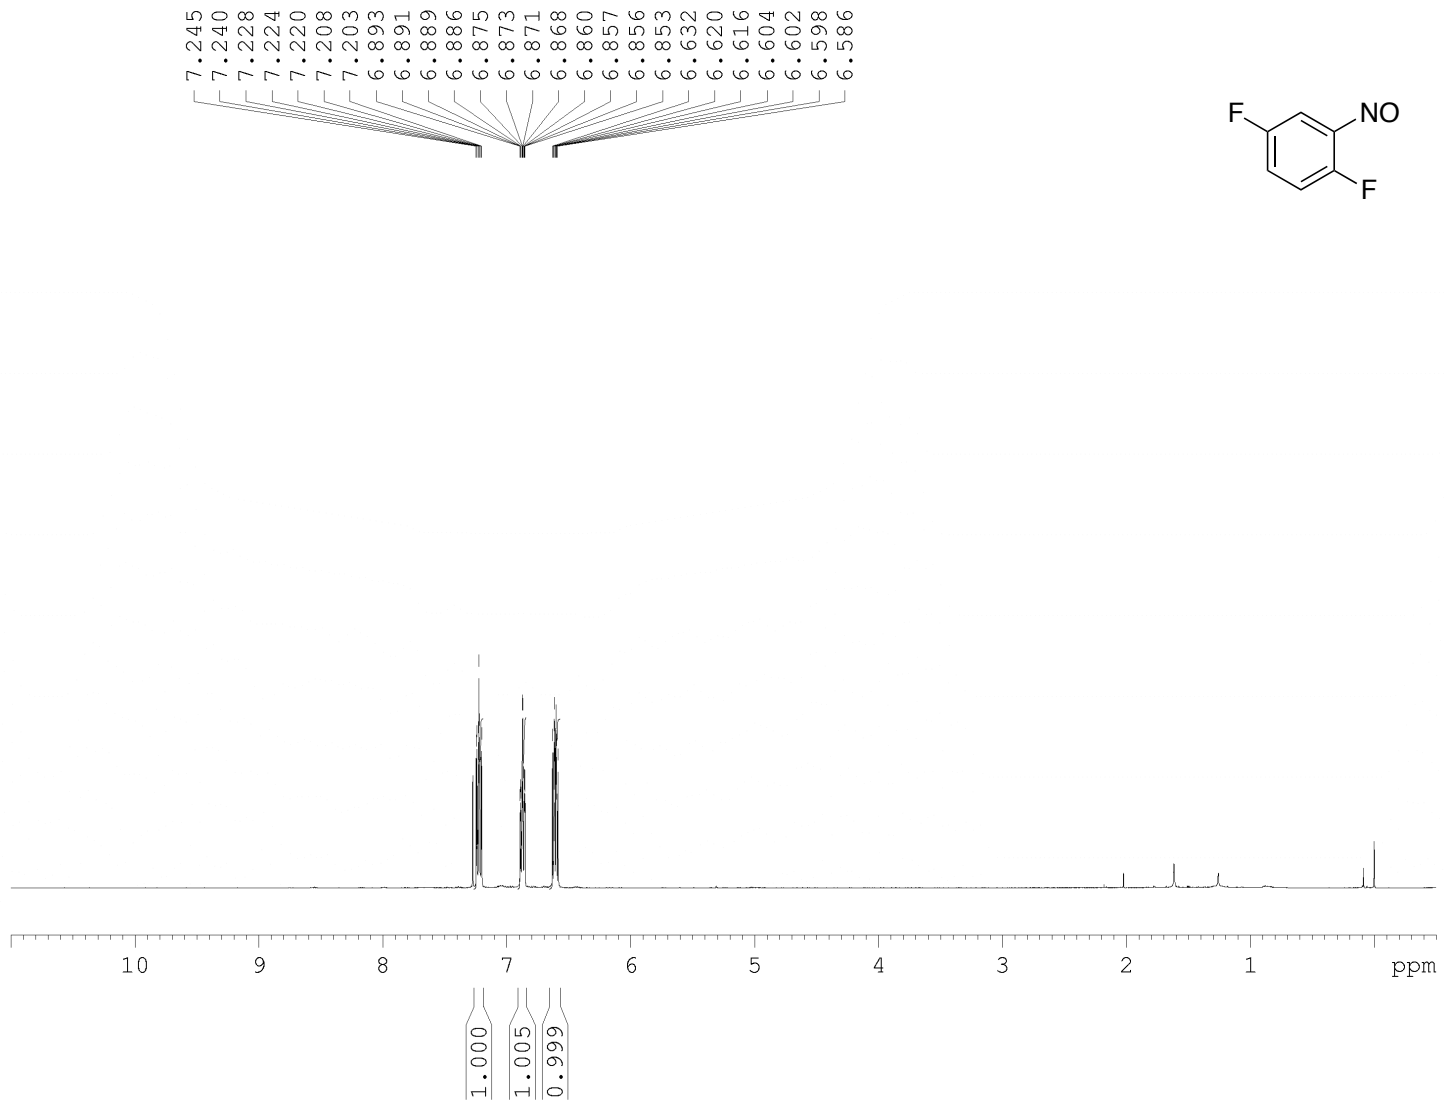

<sup>1</sup>H NMR (500 MHz, CDCl<sub>3</sub>) Spectrum of 1,4-difluoro-2-nitrosobenzene (2o)

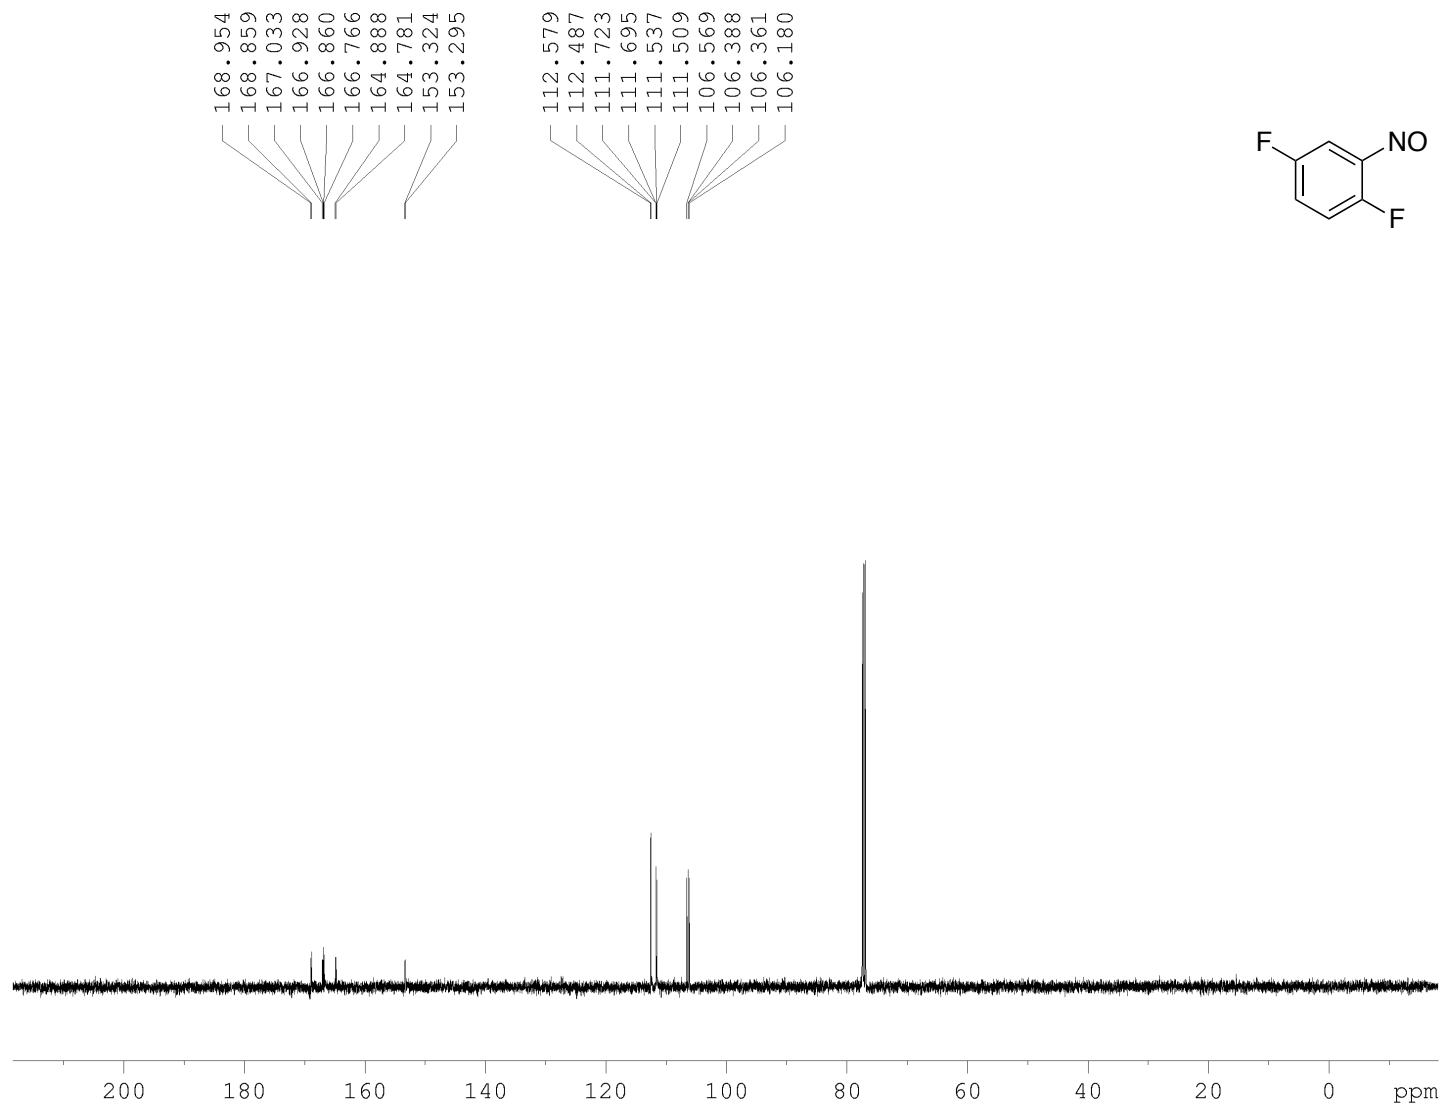

$^{13}\text{C}$  NMR (128.5 MHz,  $\text{CDCl}_3$ ) Spectrum of 1,4-difluoro-2-nitrosobenzene (2o)



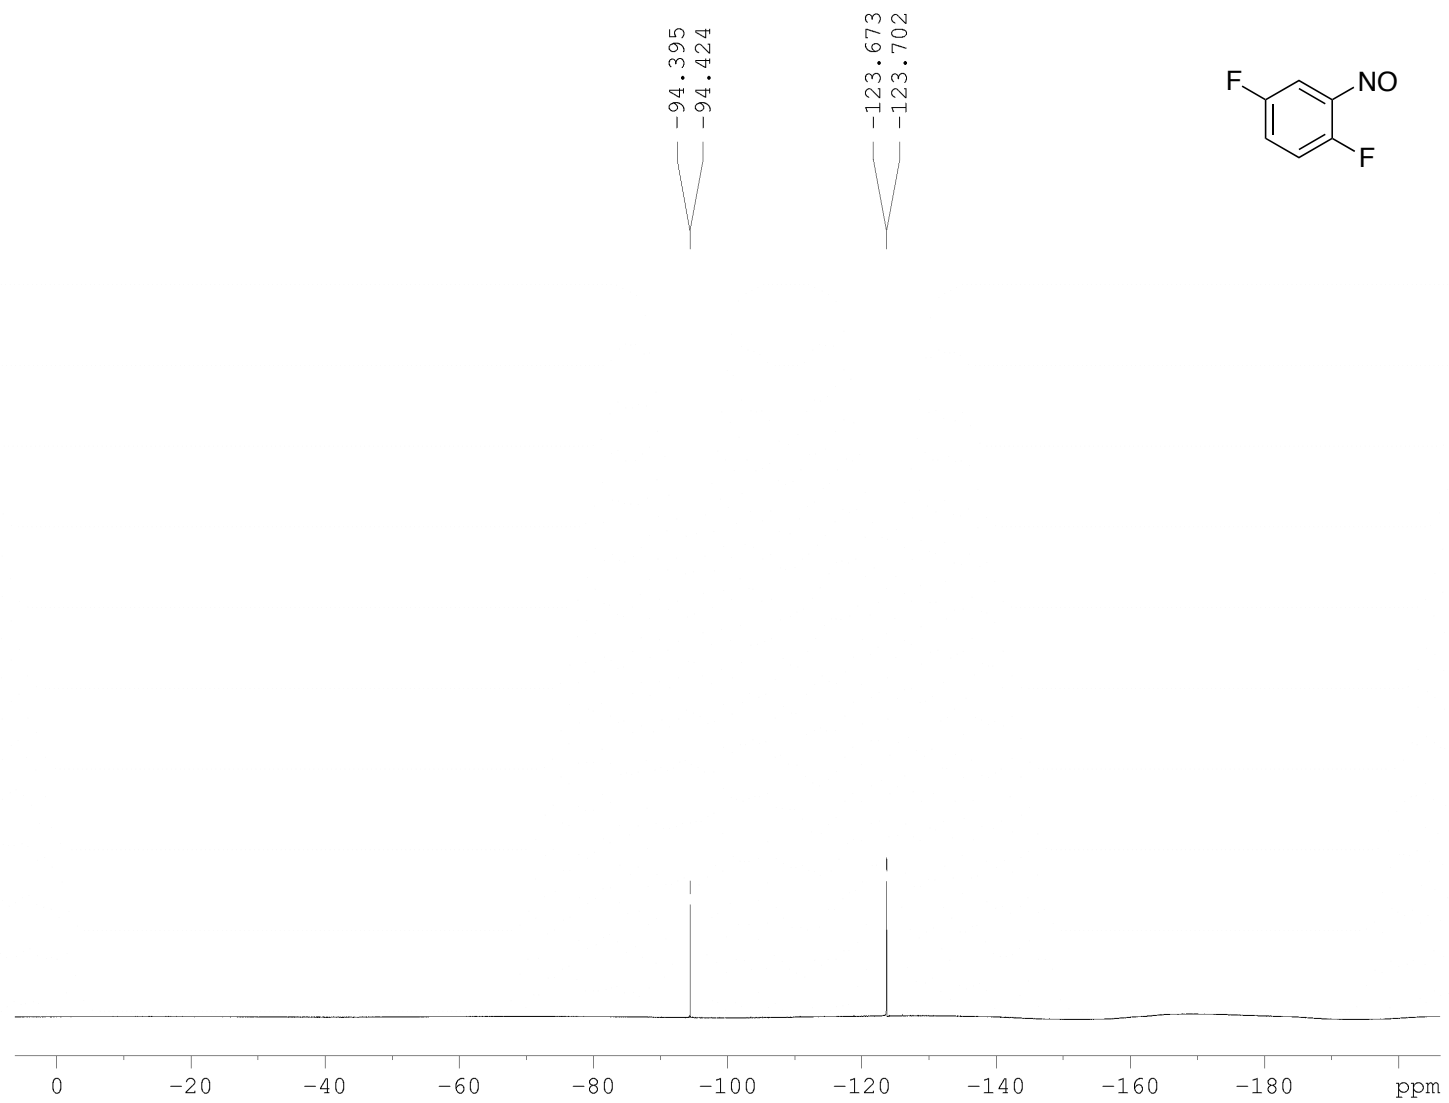

$^{19}\text{F}$  NMR (470.8 MHz,  $\text{CDCl}_3$ ) Spectrum of 1,4-difluoro-2-nitrosobenzene (2o)

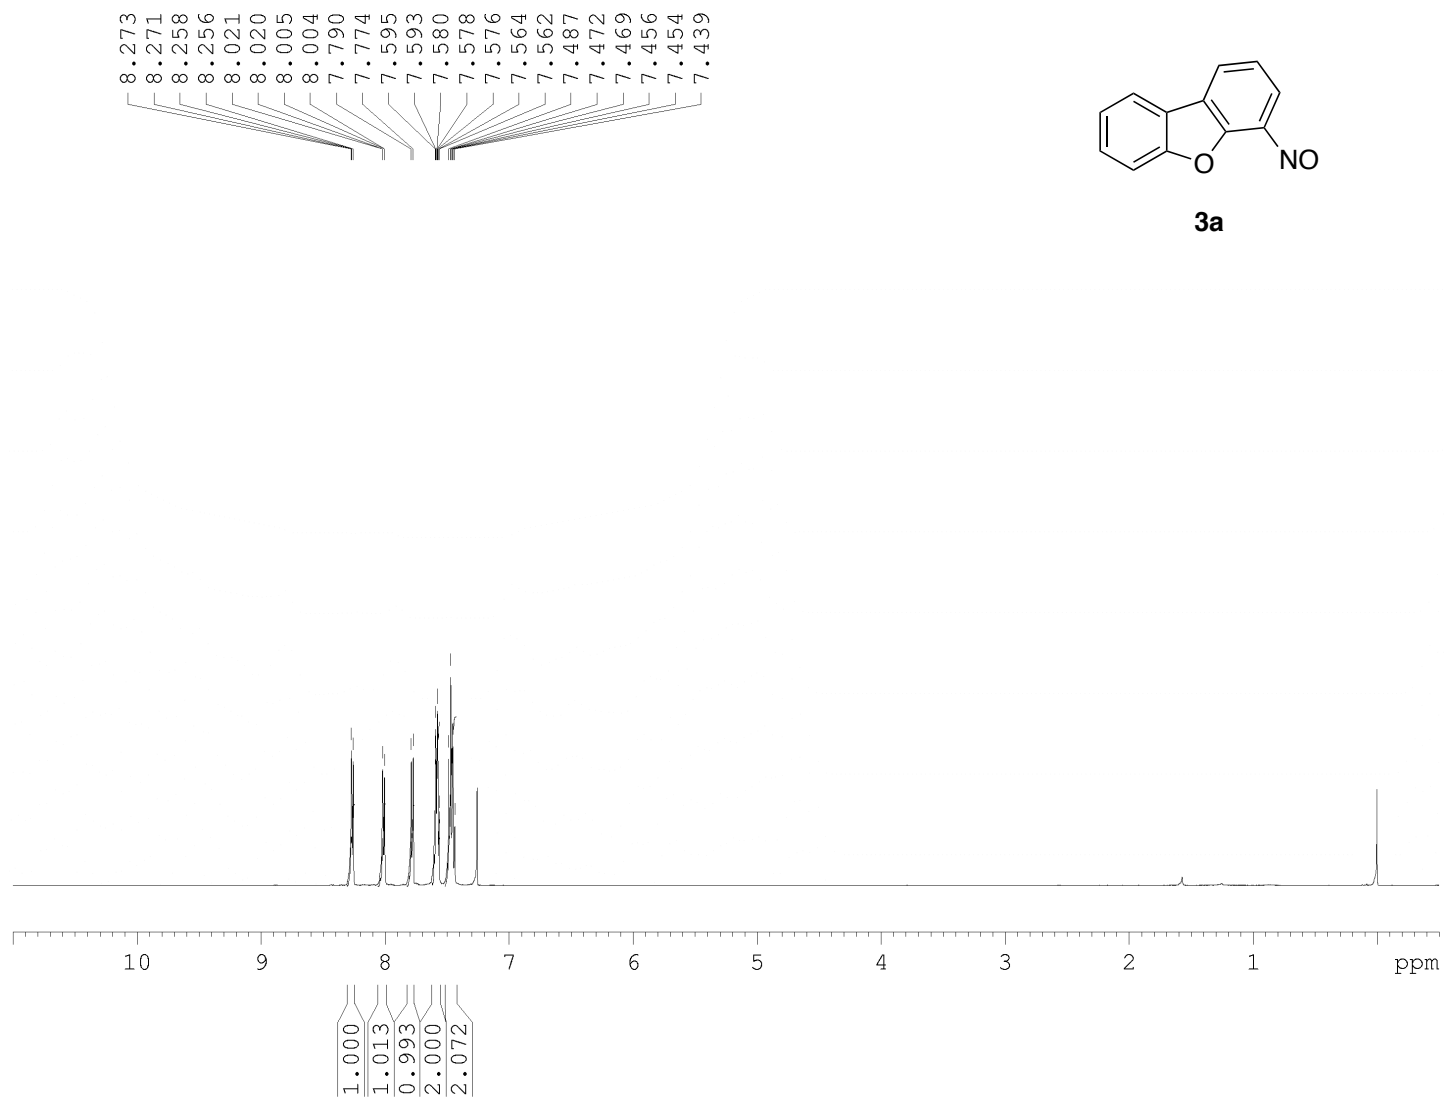

157.384  
153.265  
148.813  
128.760  
128.554  
128.421  
124.148  
122.580  
122.534  
121.051  
116.263  
112.669

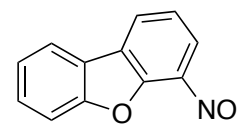

**3a**

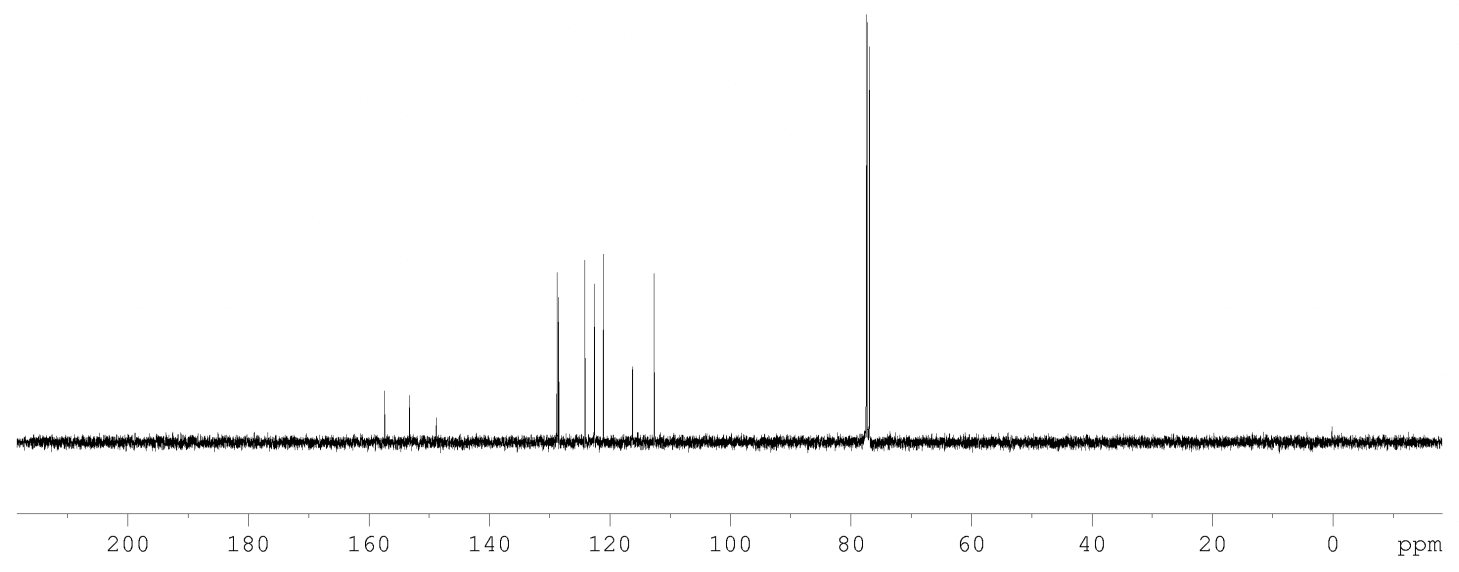

<sup>13</sup>C NMR (128.5 MHz, CDCl<sub>3</sub>) Spectrum of 4-nitrosodibenzo[*b,d*]furan (3a)

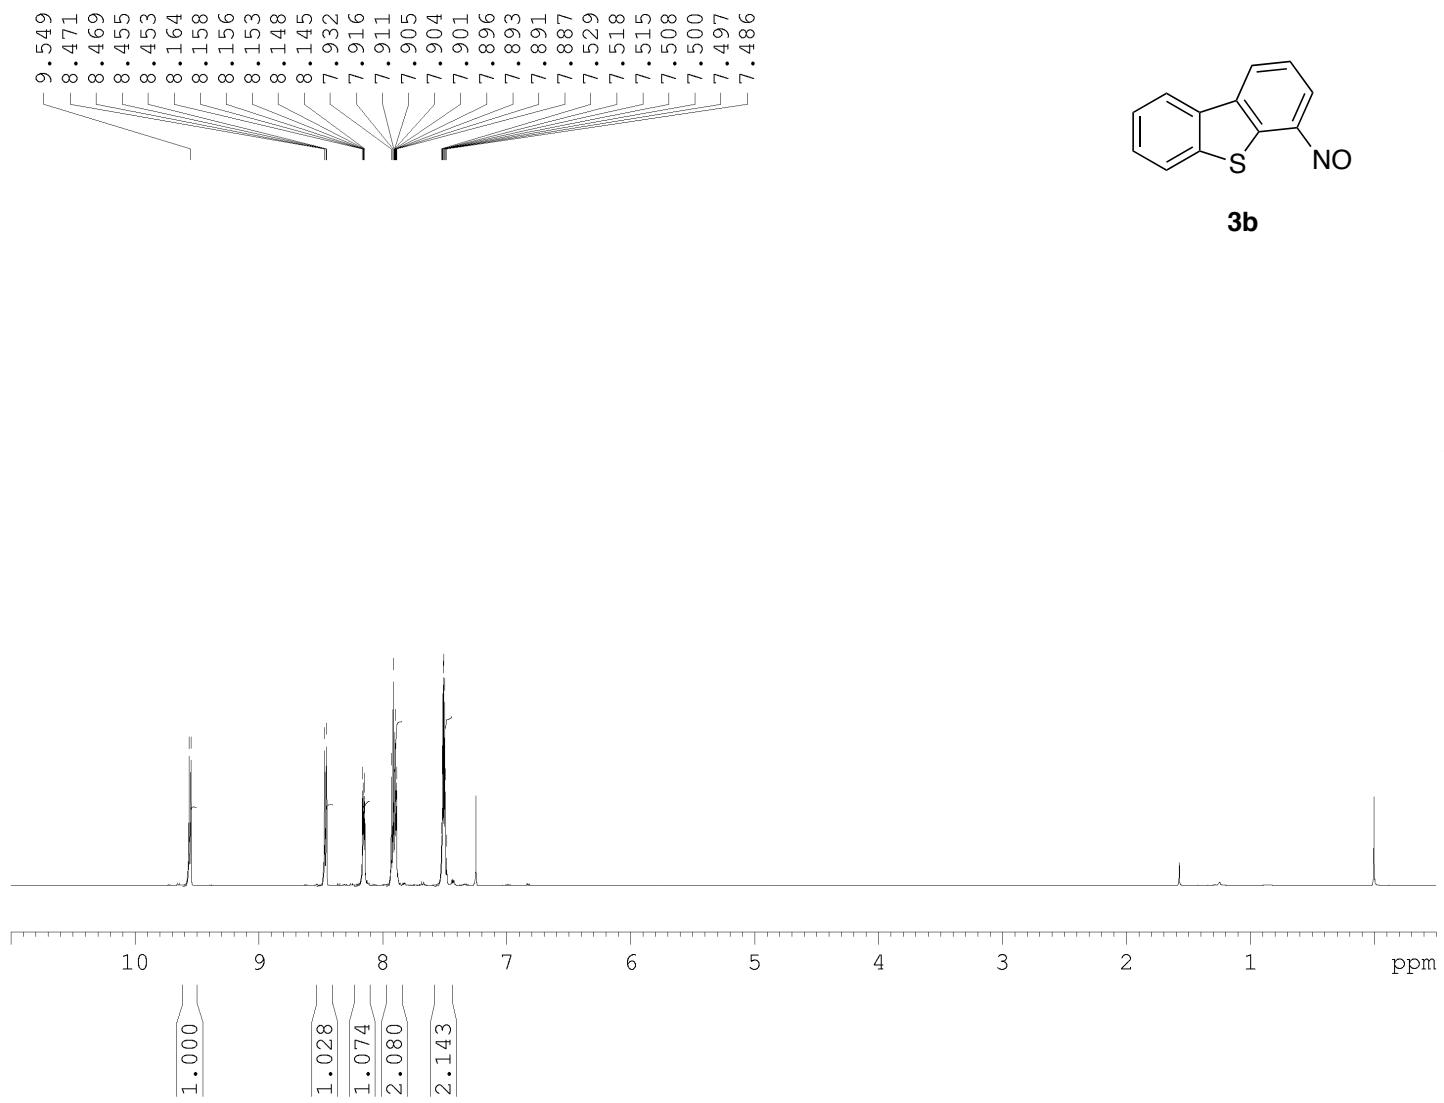

<sup>1</sup>H NMR (500 MHz, CDCl<sub>3</sub>) Spectrum of 4-nitrosodibenzo[*b,d*]thiophene (3b)

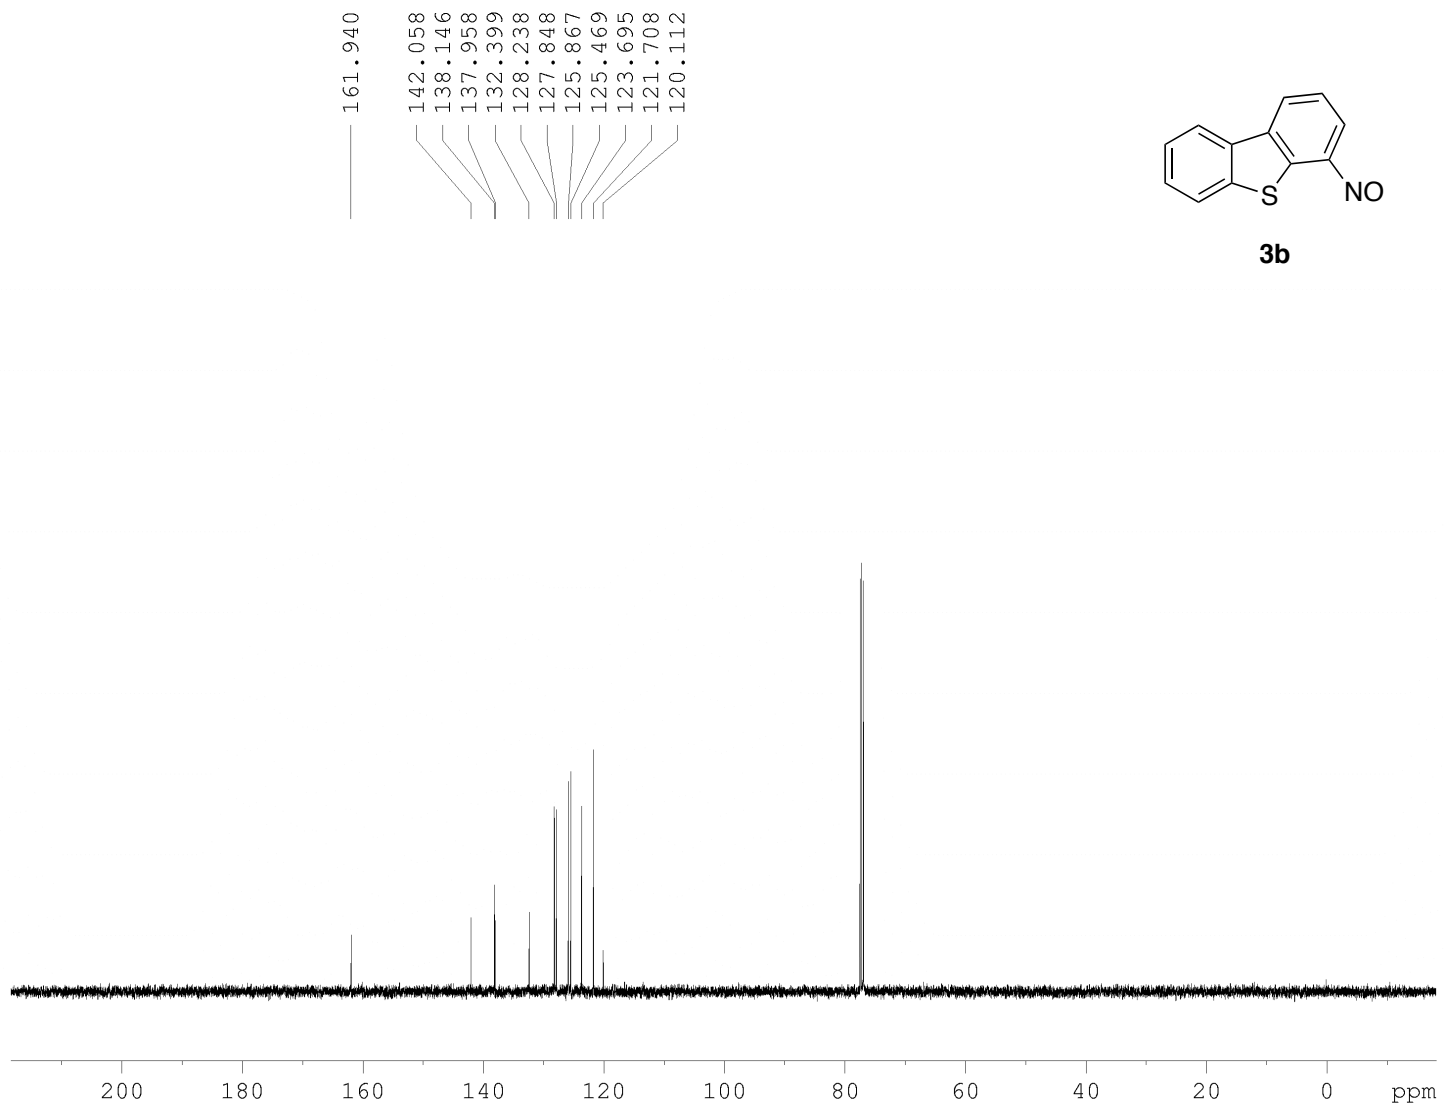

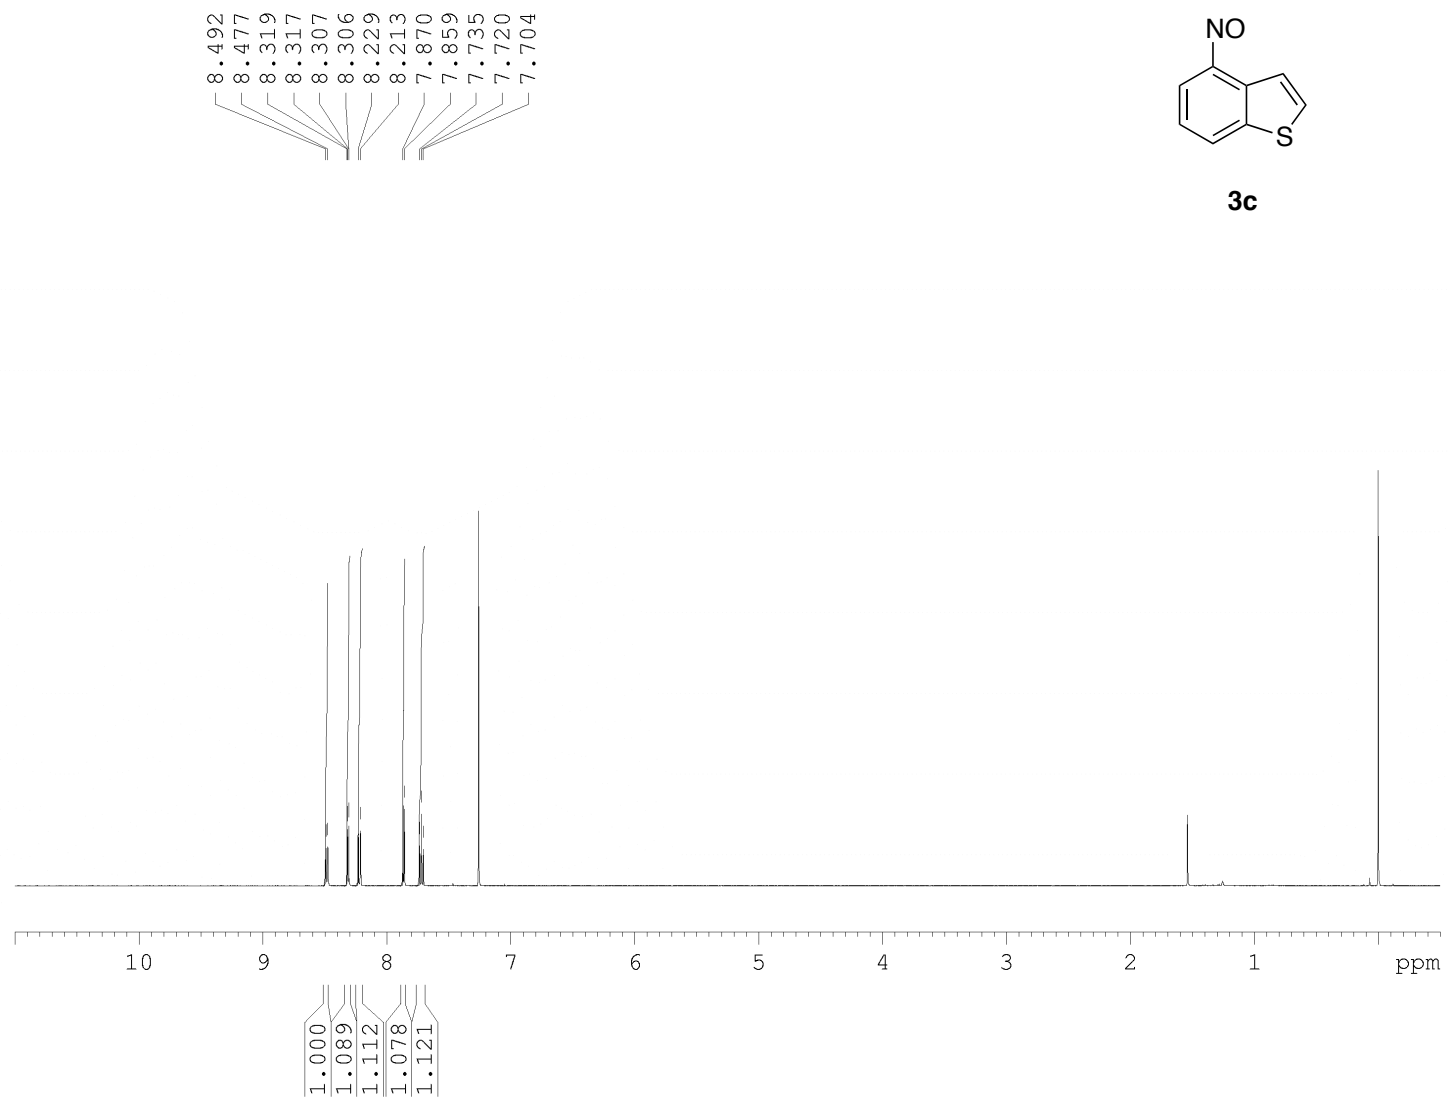

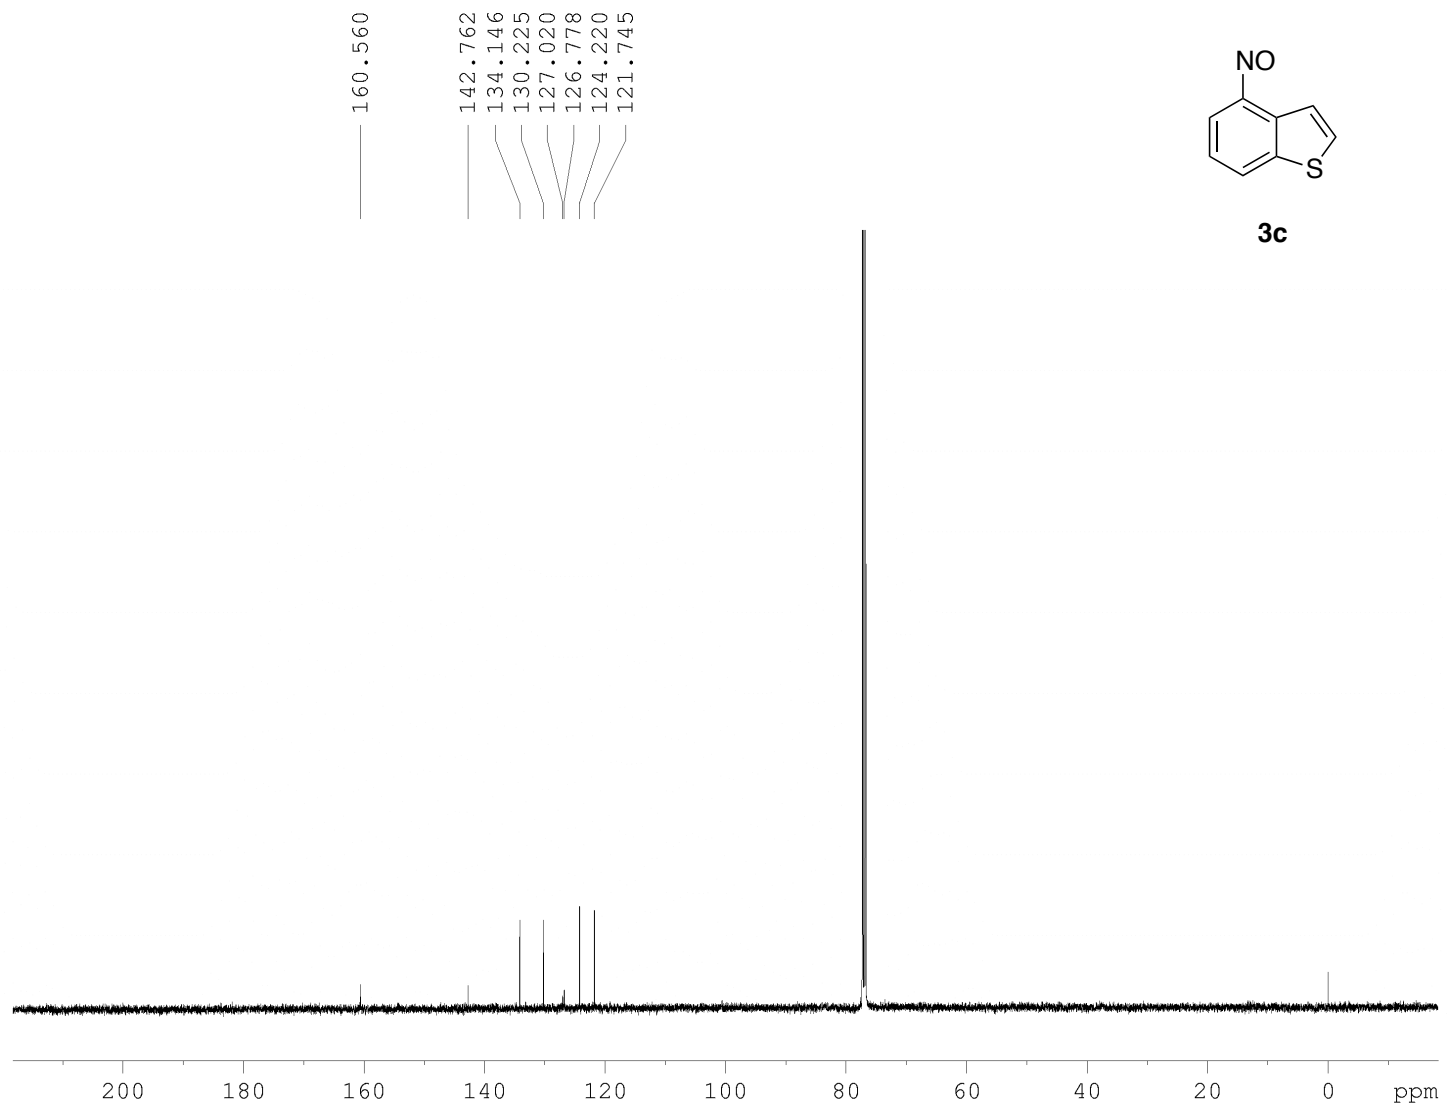

$^{13}\text{C}$  NMR (128.5 MHz,  $\text{CDCl}_3$ ) Spectrum of 4-nitrosobenzo[*b*]thiophene (3c)

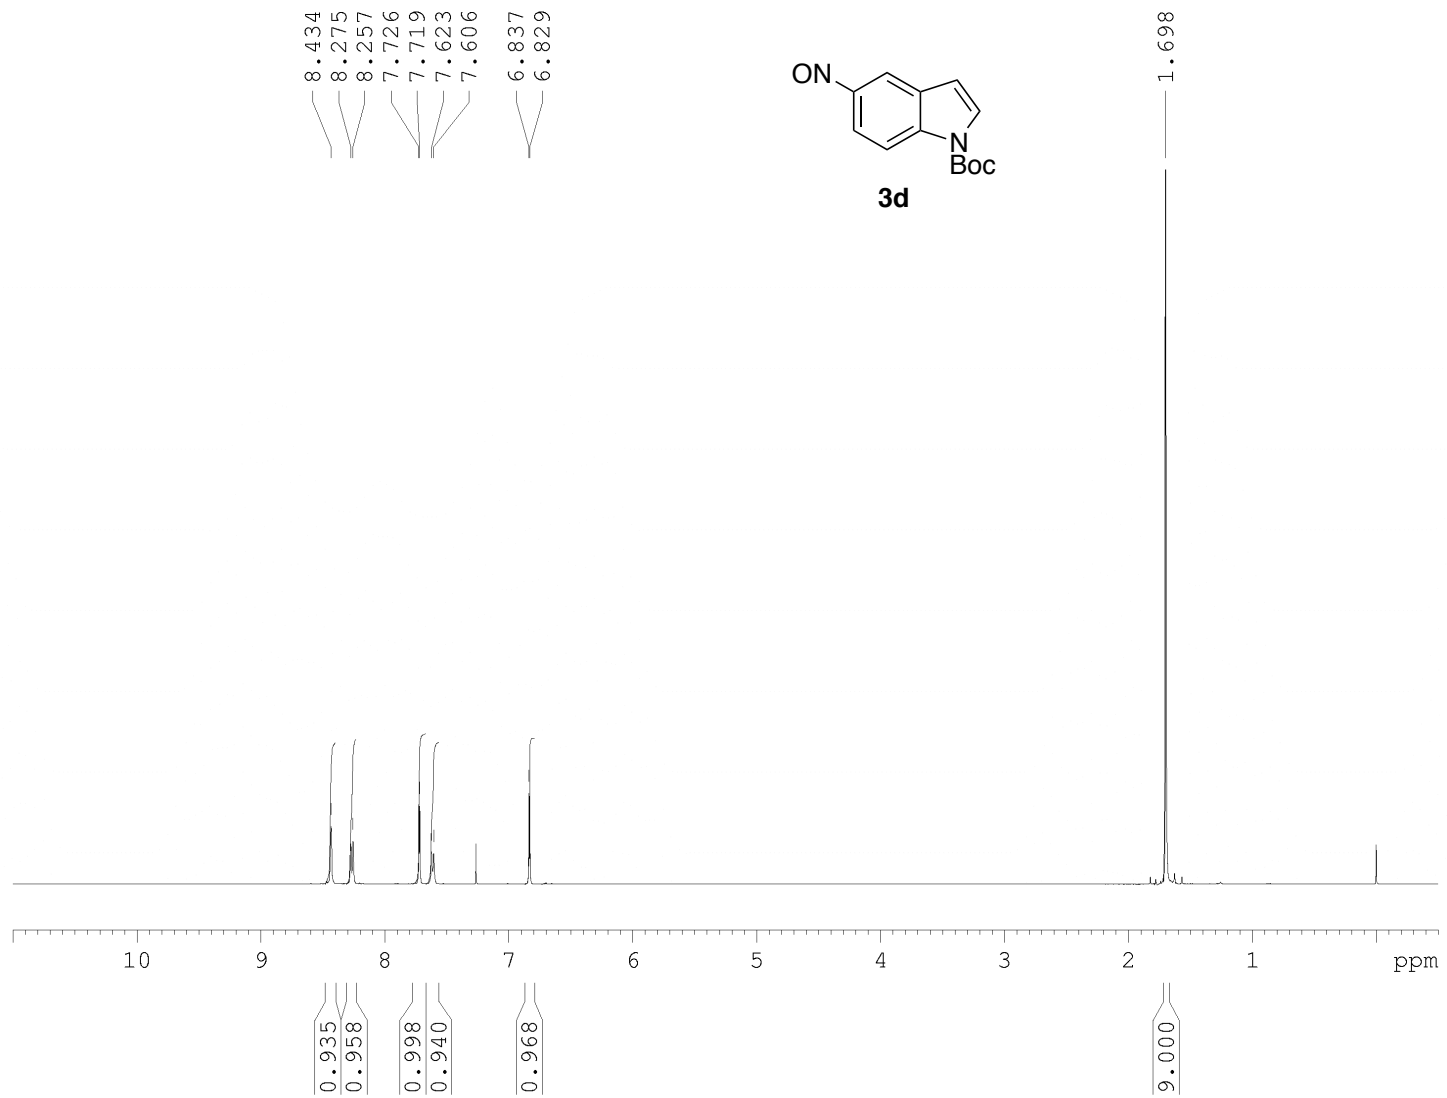

<sup>1</sup>H NMR (500 MHz, CDCl<sub>3</sub>) Spectrum of *tert*-butyl 5-nitroso-1*H*-indole-1-carboxylate (3d)



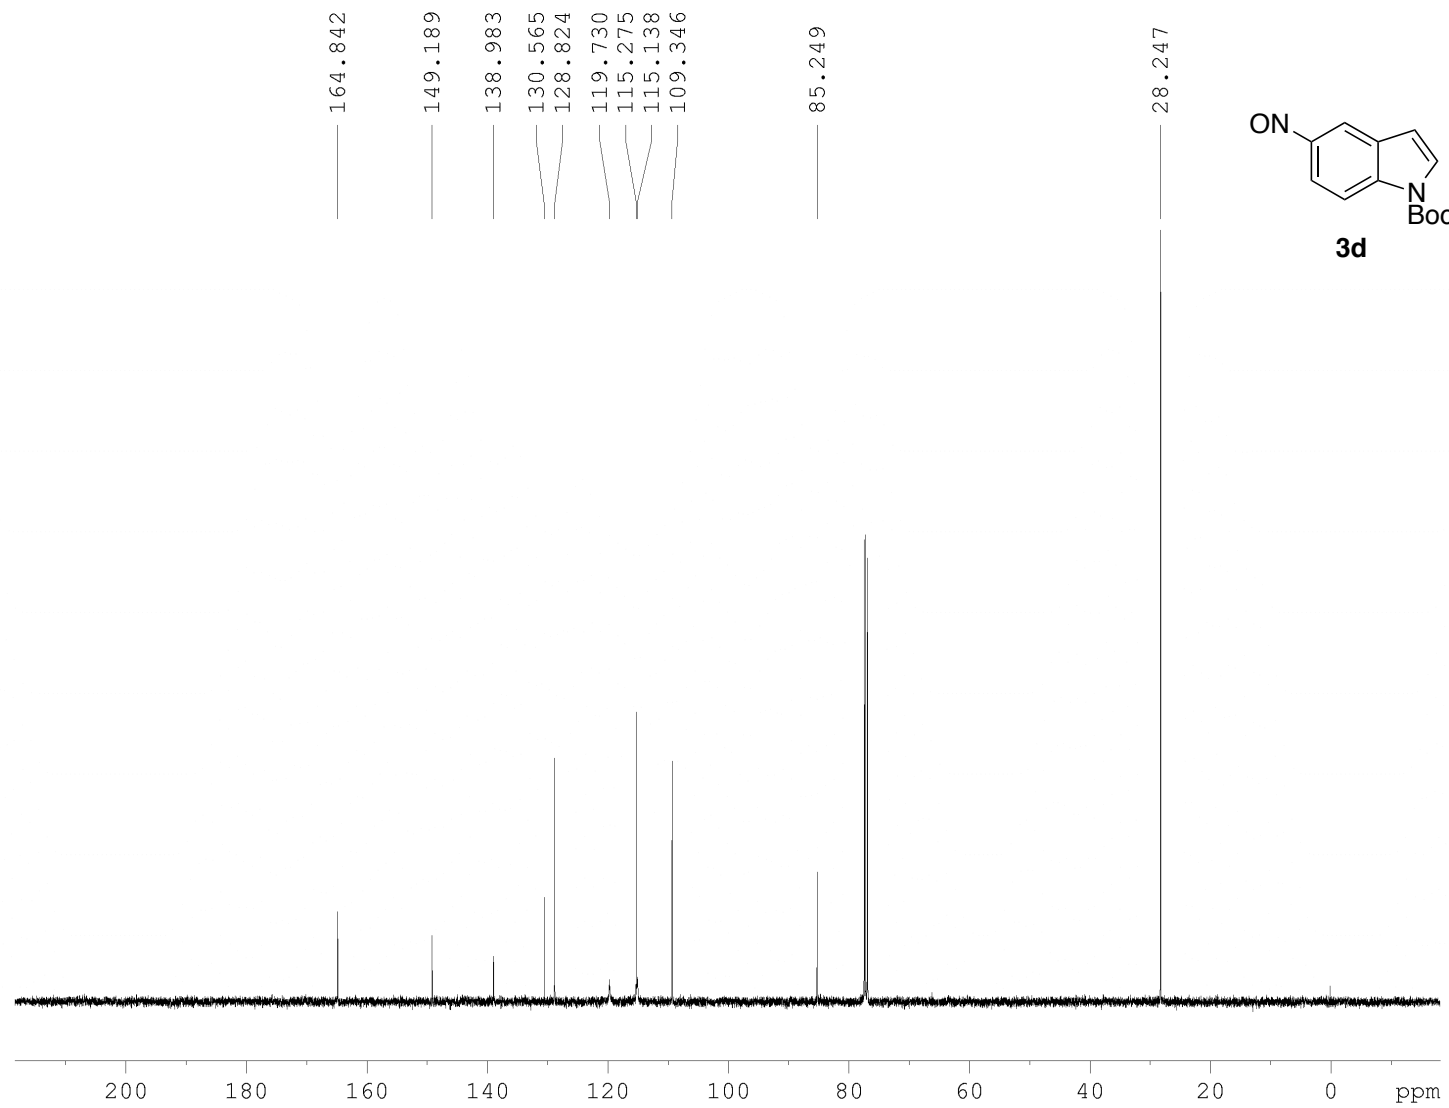

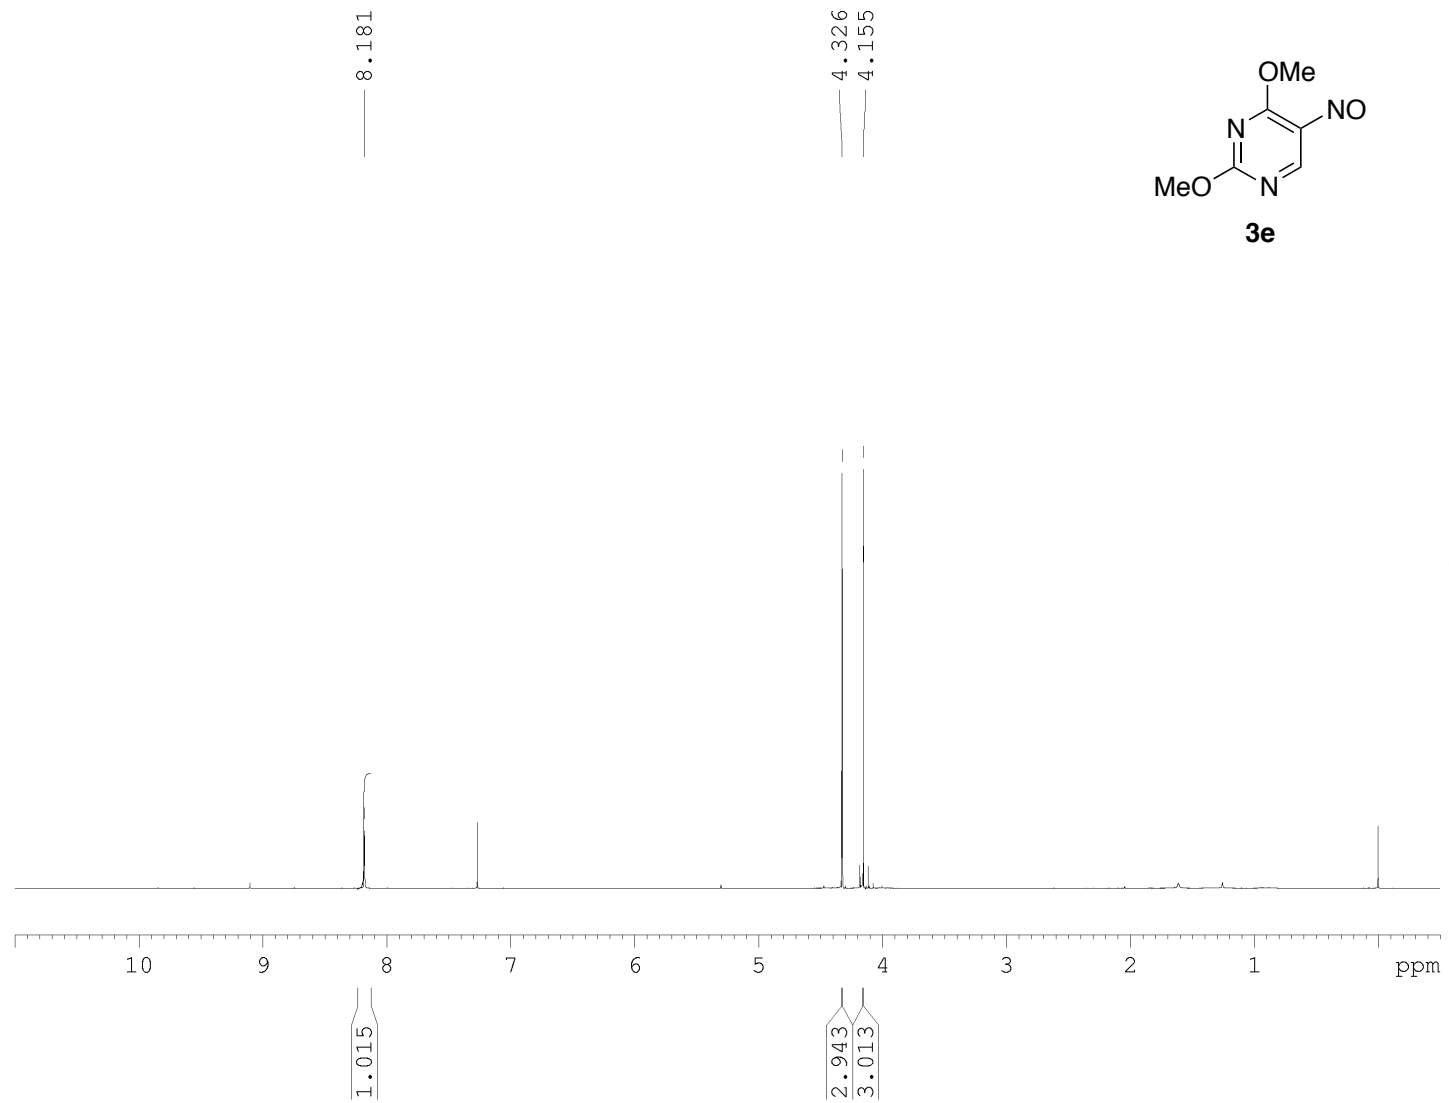

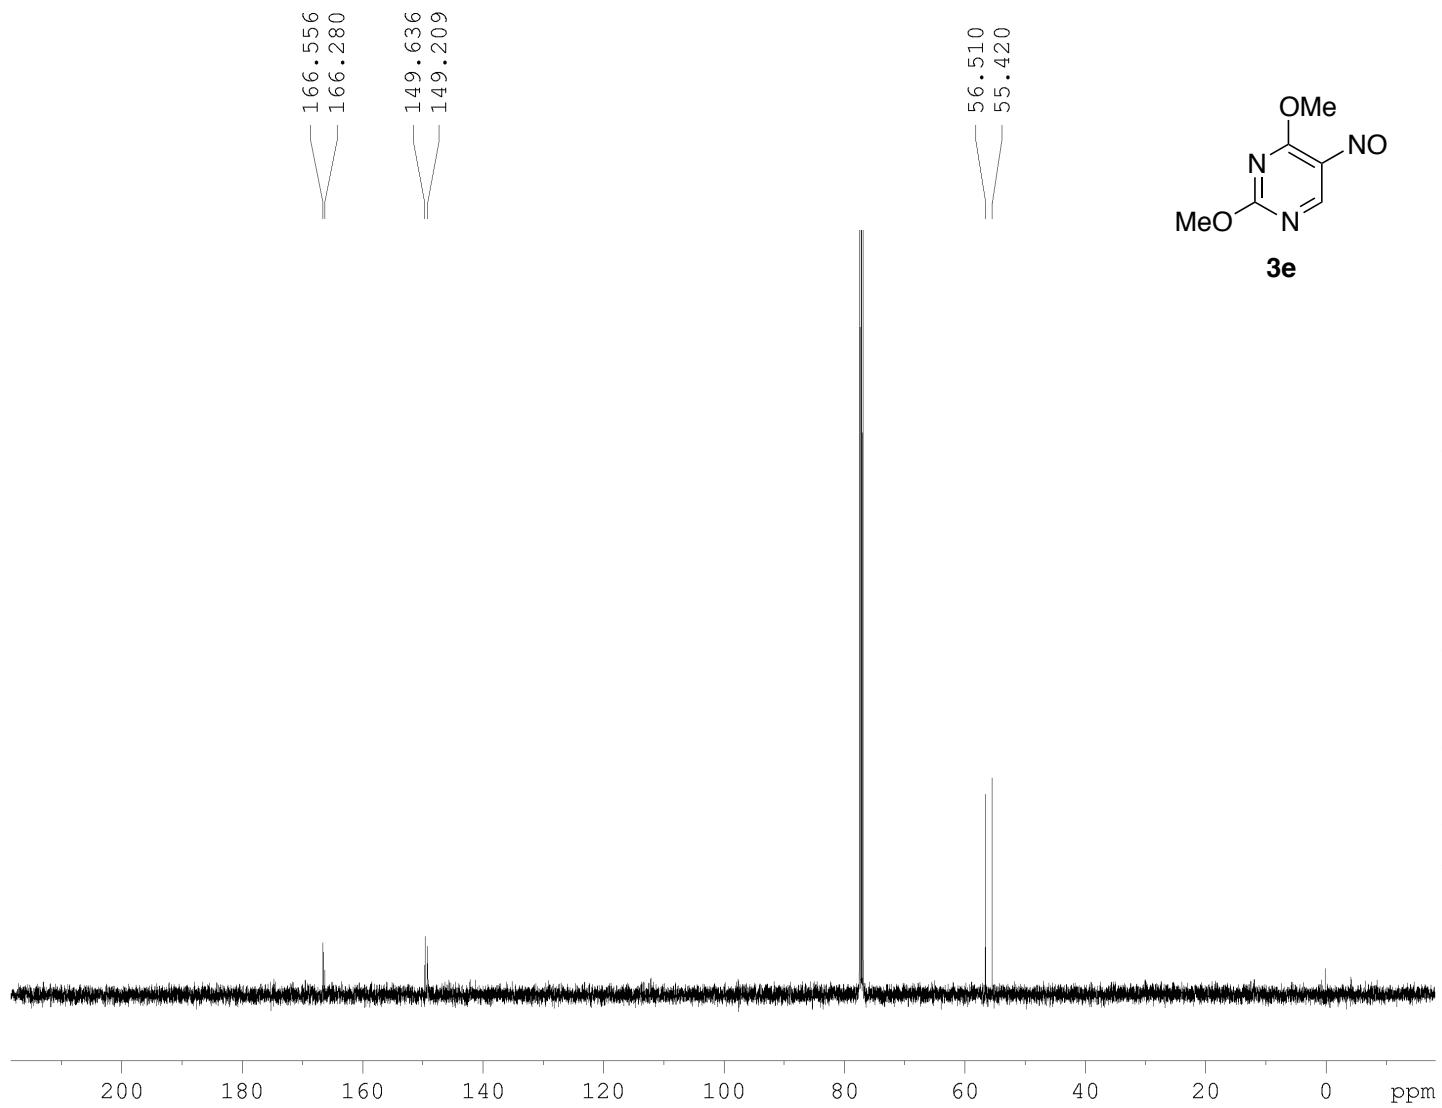

<sup>13</sup>C NMR (128.5 MHz, CDCl<sub>3</sub>) Spectrum of 2,4-dimethoxy-5-nitrosopyrimidine (3e)

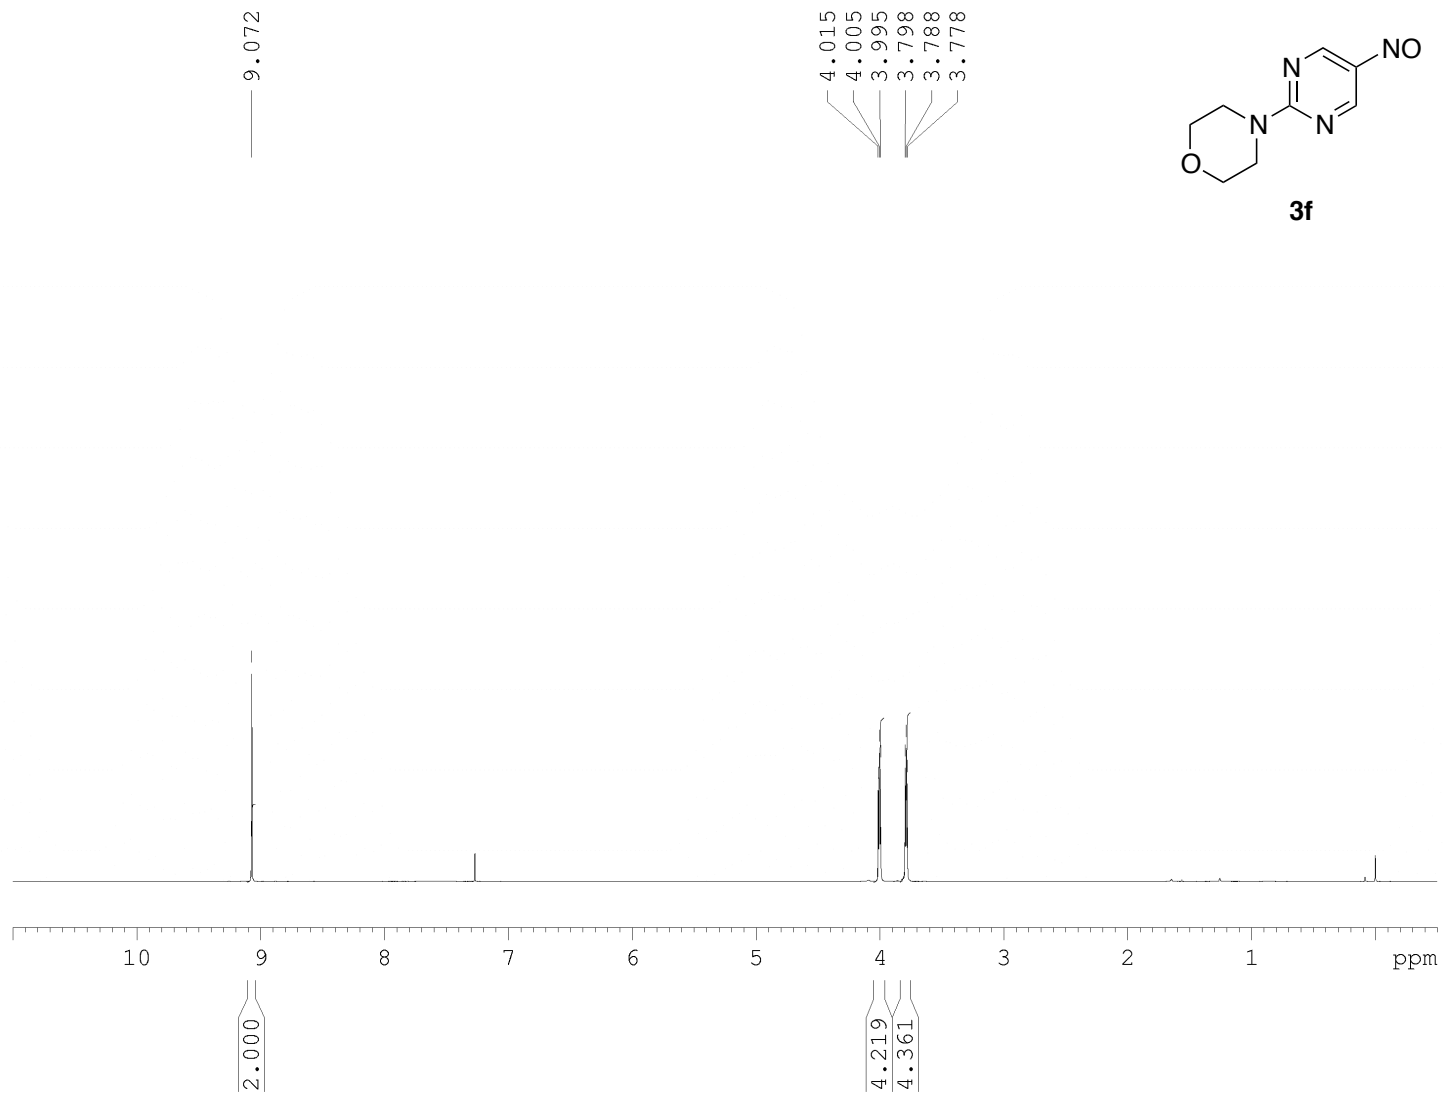

<sup>1</sup>H NMR (500 MHz, CDCl<sub>3</sub>) Spectrum of 4-(5-nitrosopyrimidin-2-yl)morpholine (**3f**)

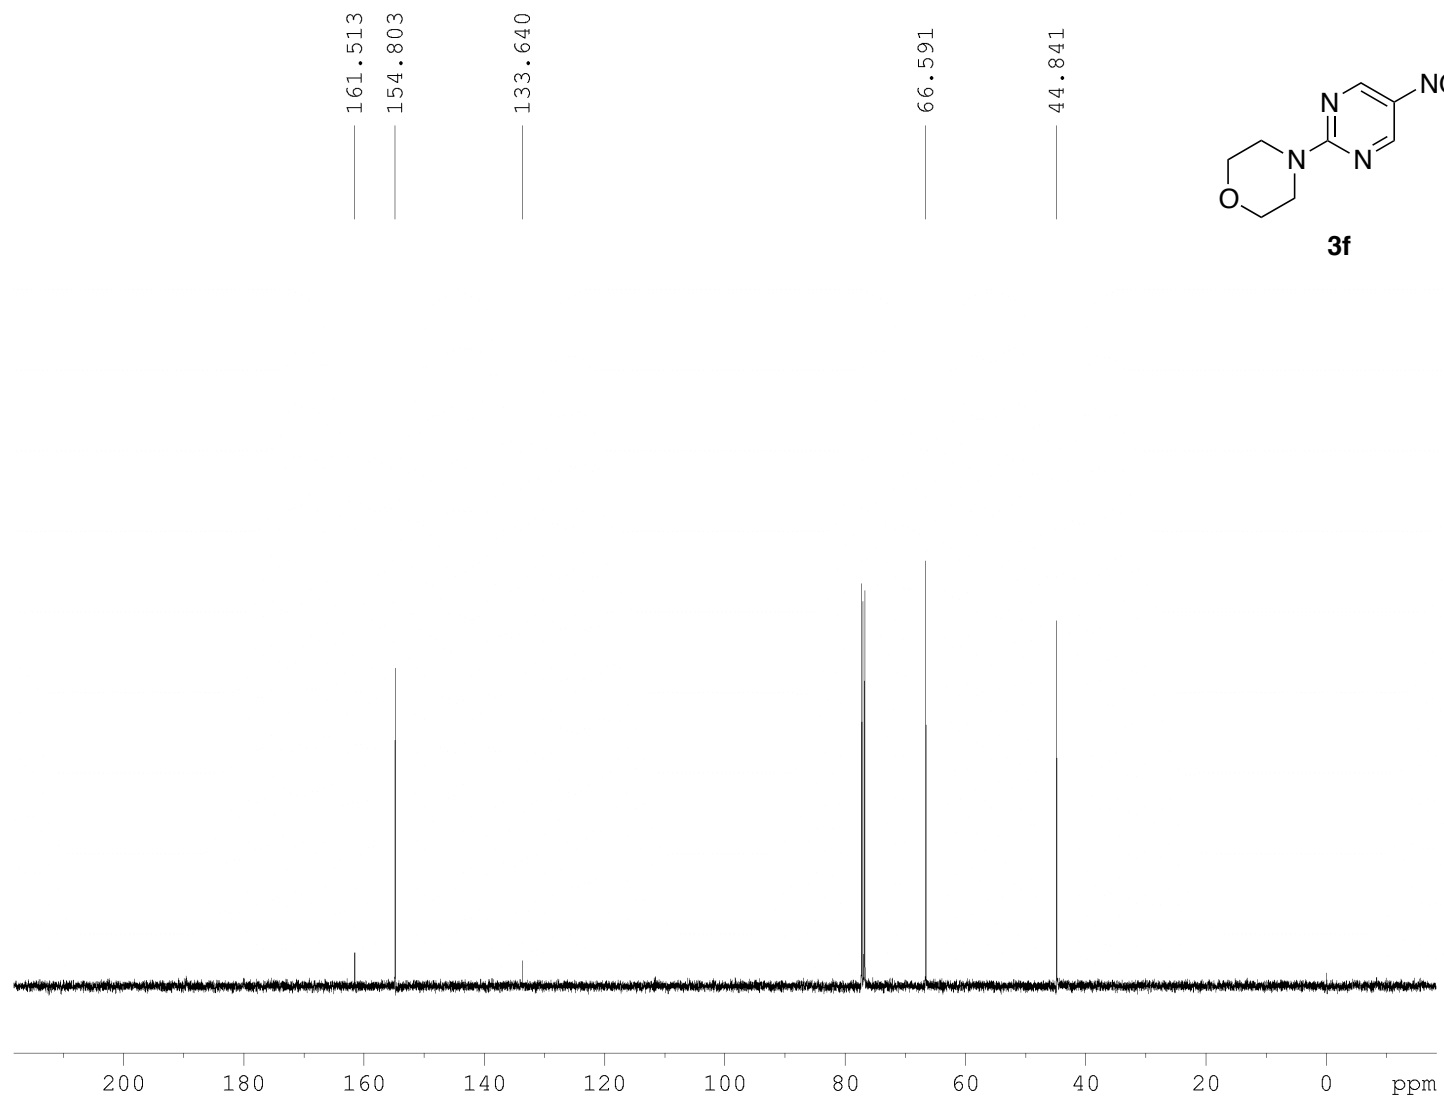

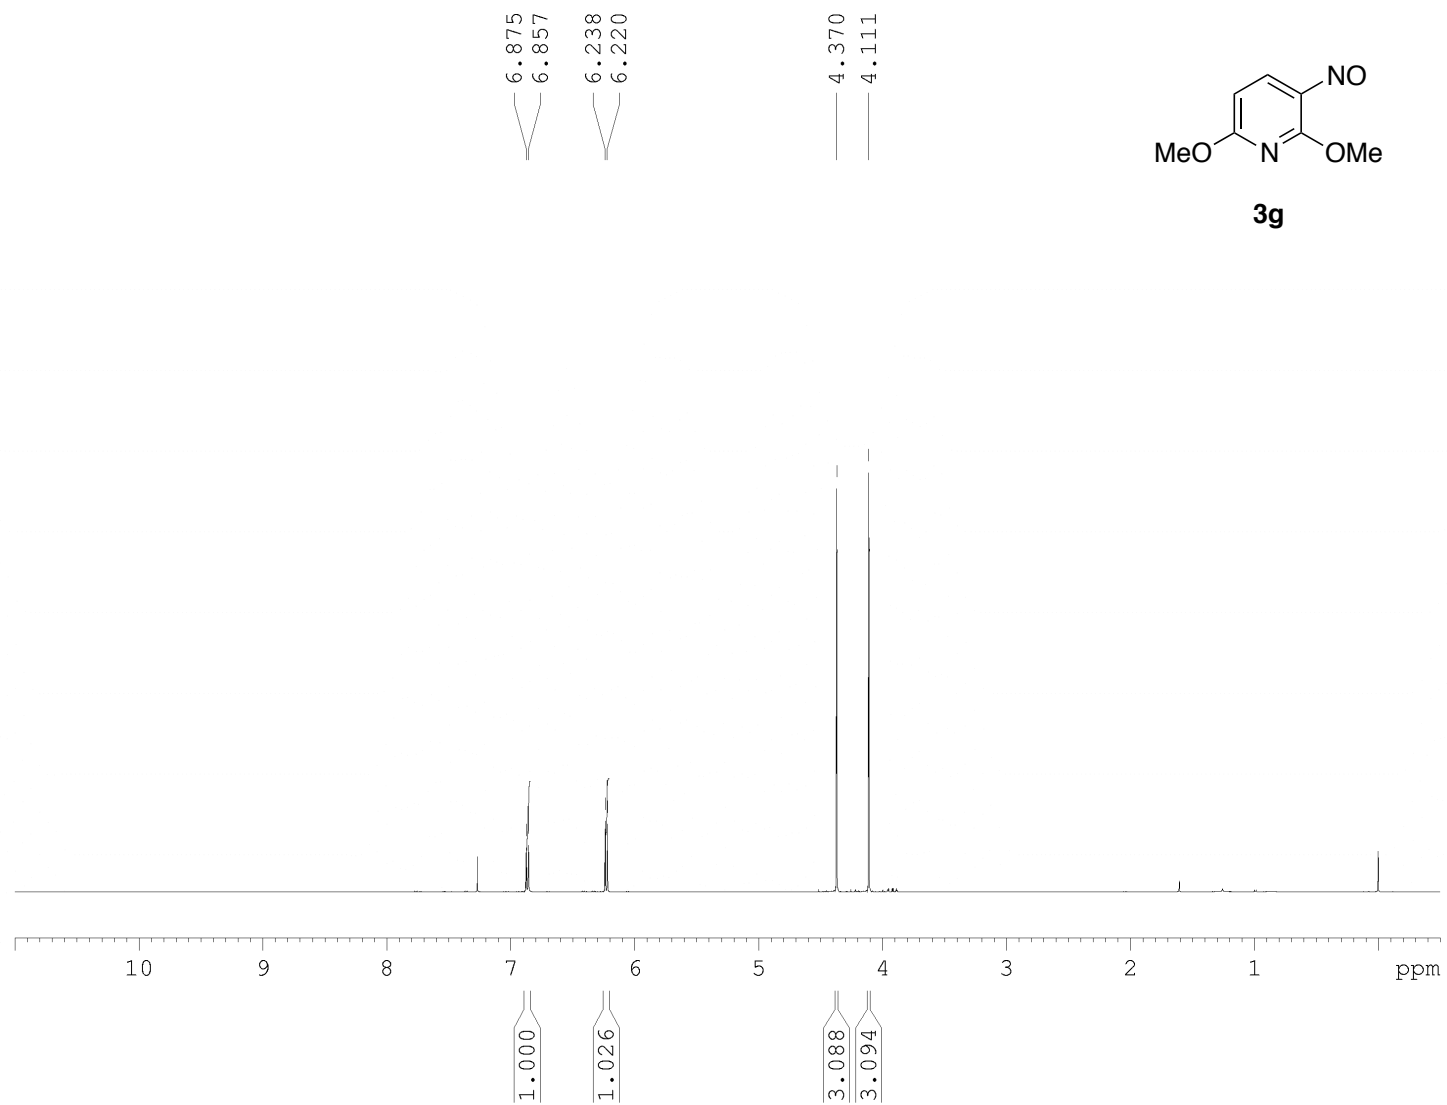

<sup>1</sup>H NMR (500 MHz, CDCl<sub>3</sub>) Spectrum of 2,6-dimethoxy-3-nitrosopyridine (3g)

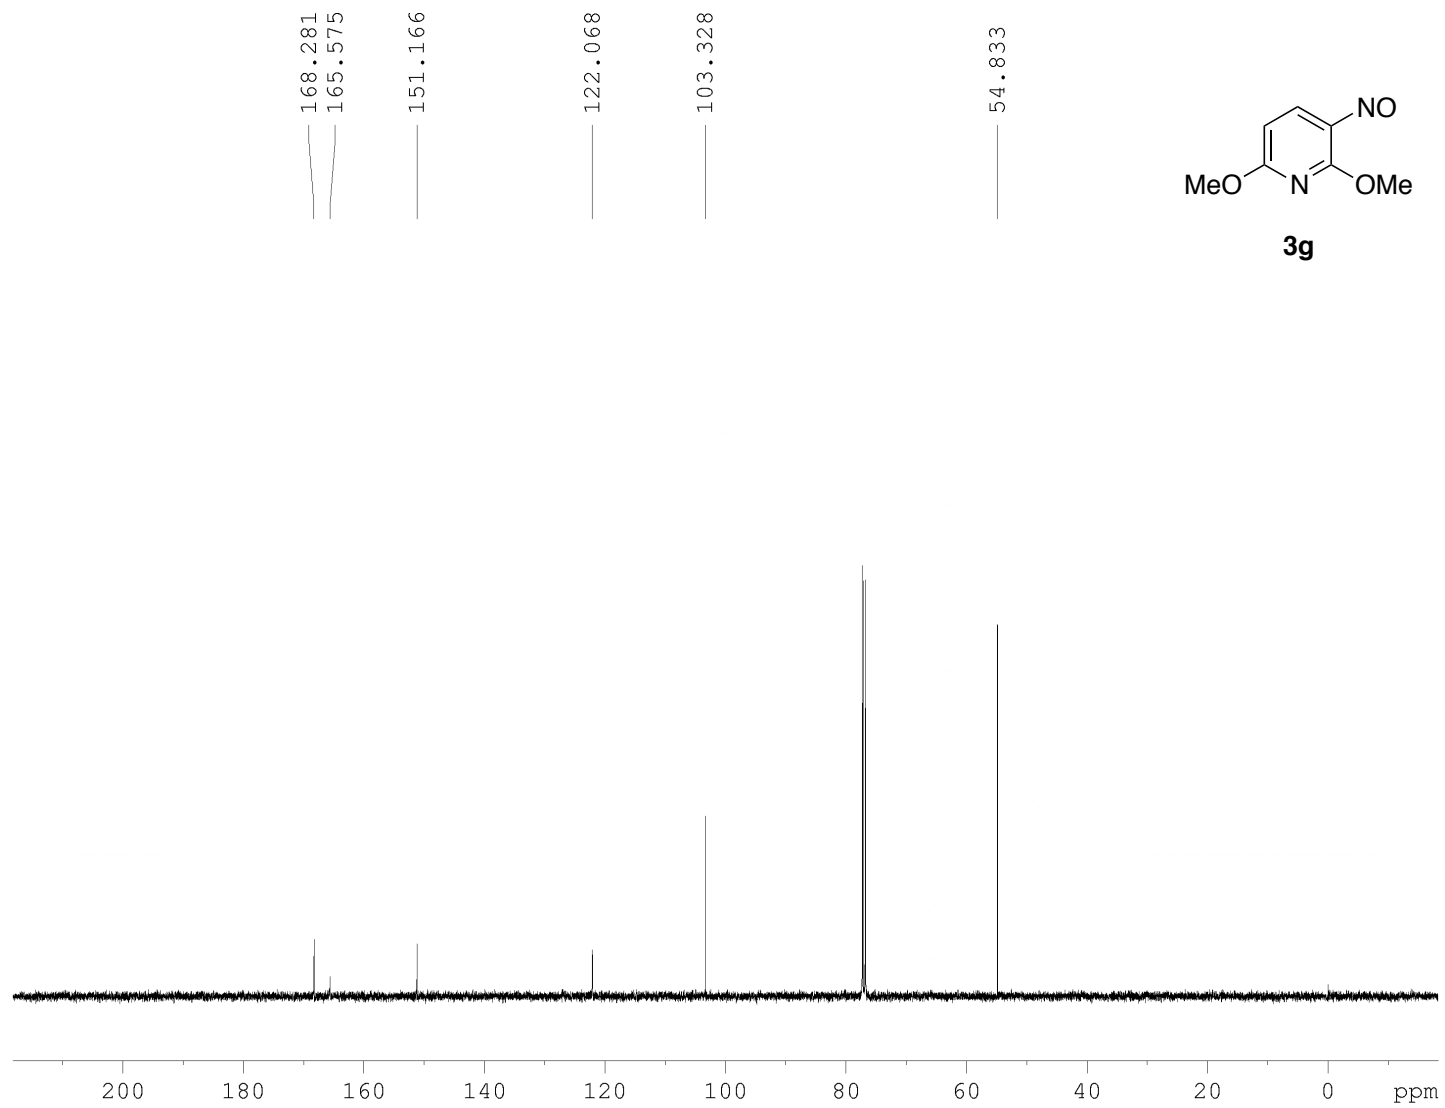

$^{13}\text{C}$  NMR (128.5 MHz,  $\text{CDCl}_3$ ) Spectrum of 2,6-dimethoxy-3-nitrosopyridine (3g)

9.485  
9.412  
9.400  
8.975  
8.963  
8.408  
8.392  
7.746  
7.731  
7.715  
7.154  
7.152  
7.139  
7.137

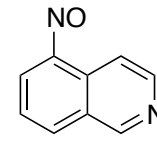

**3h**

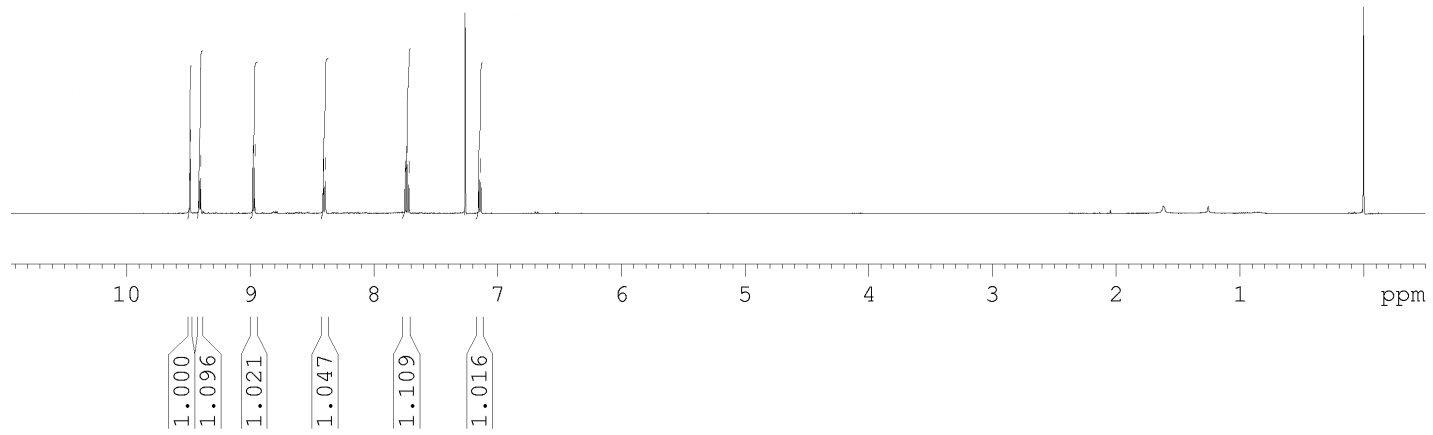

**<sup>1</sup>H NMR (500 MHz, CDCl<sub>3</sub>) Spectrum of 5-nitrosoisoquinoline (3h)**



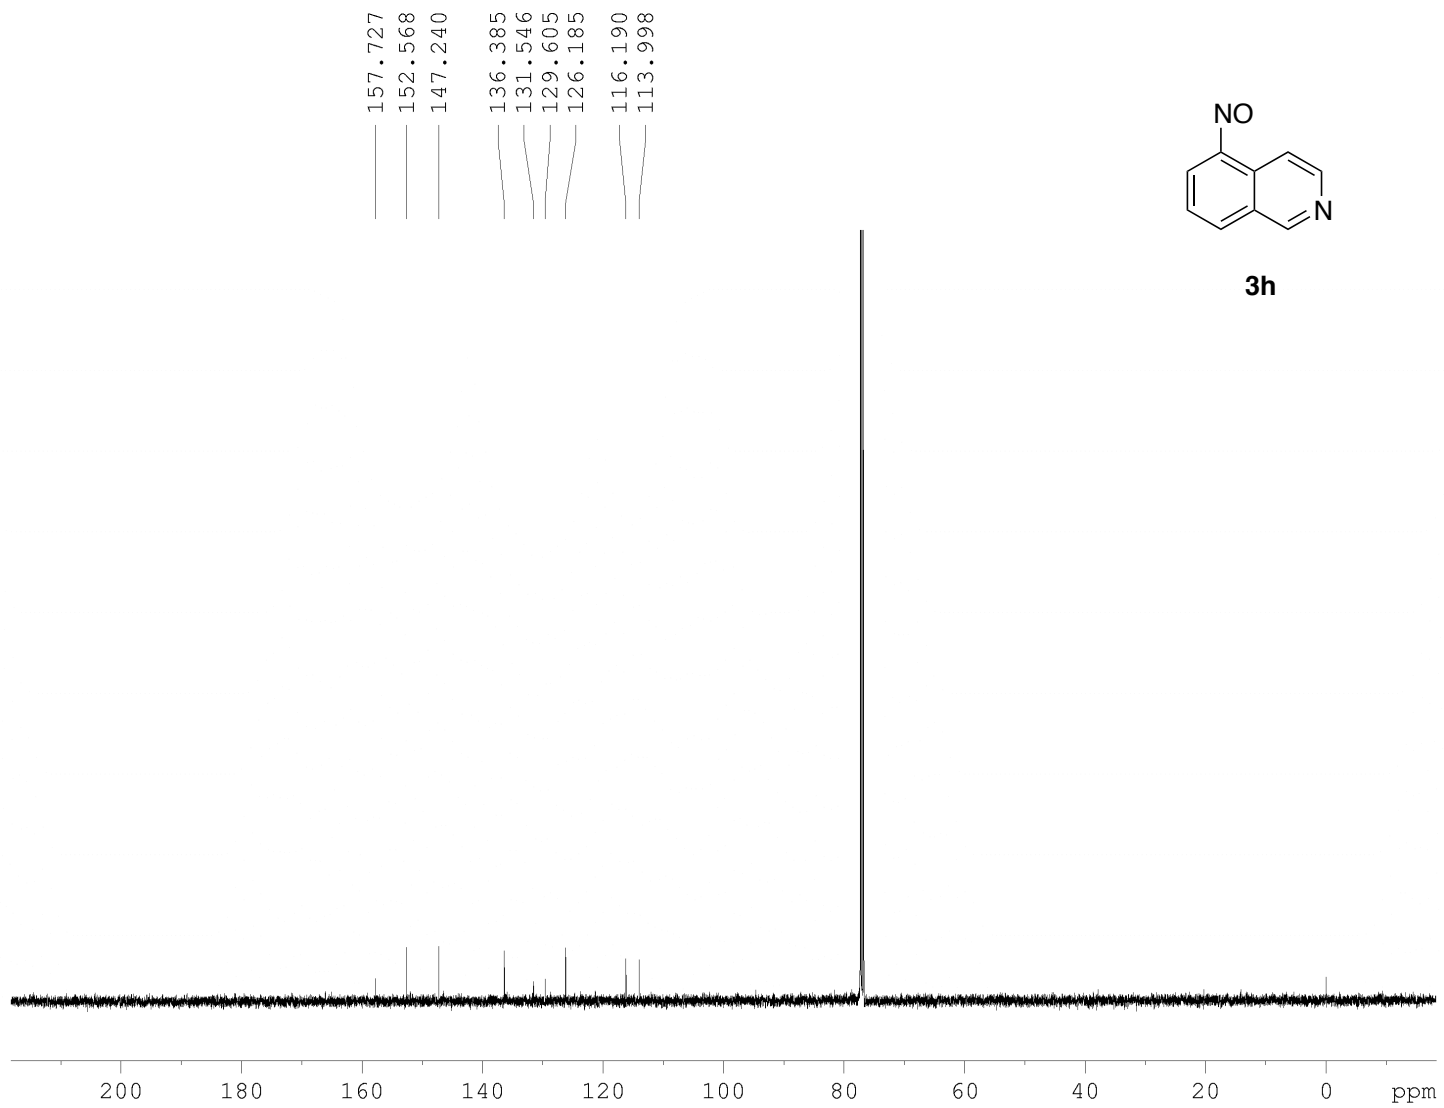

$^{13}\text{C}$  NMR (128.5 MHz,  $\text{CDCl}_3$ ) Spectrum of 5-nitrosoisoquinoline (3h)

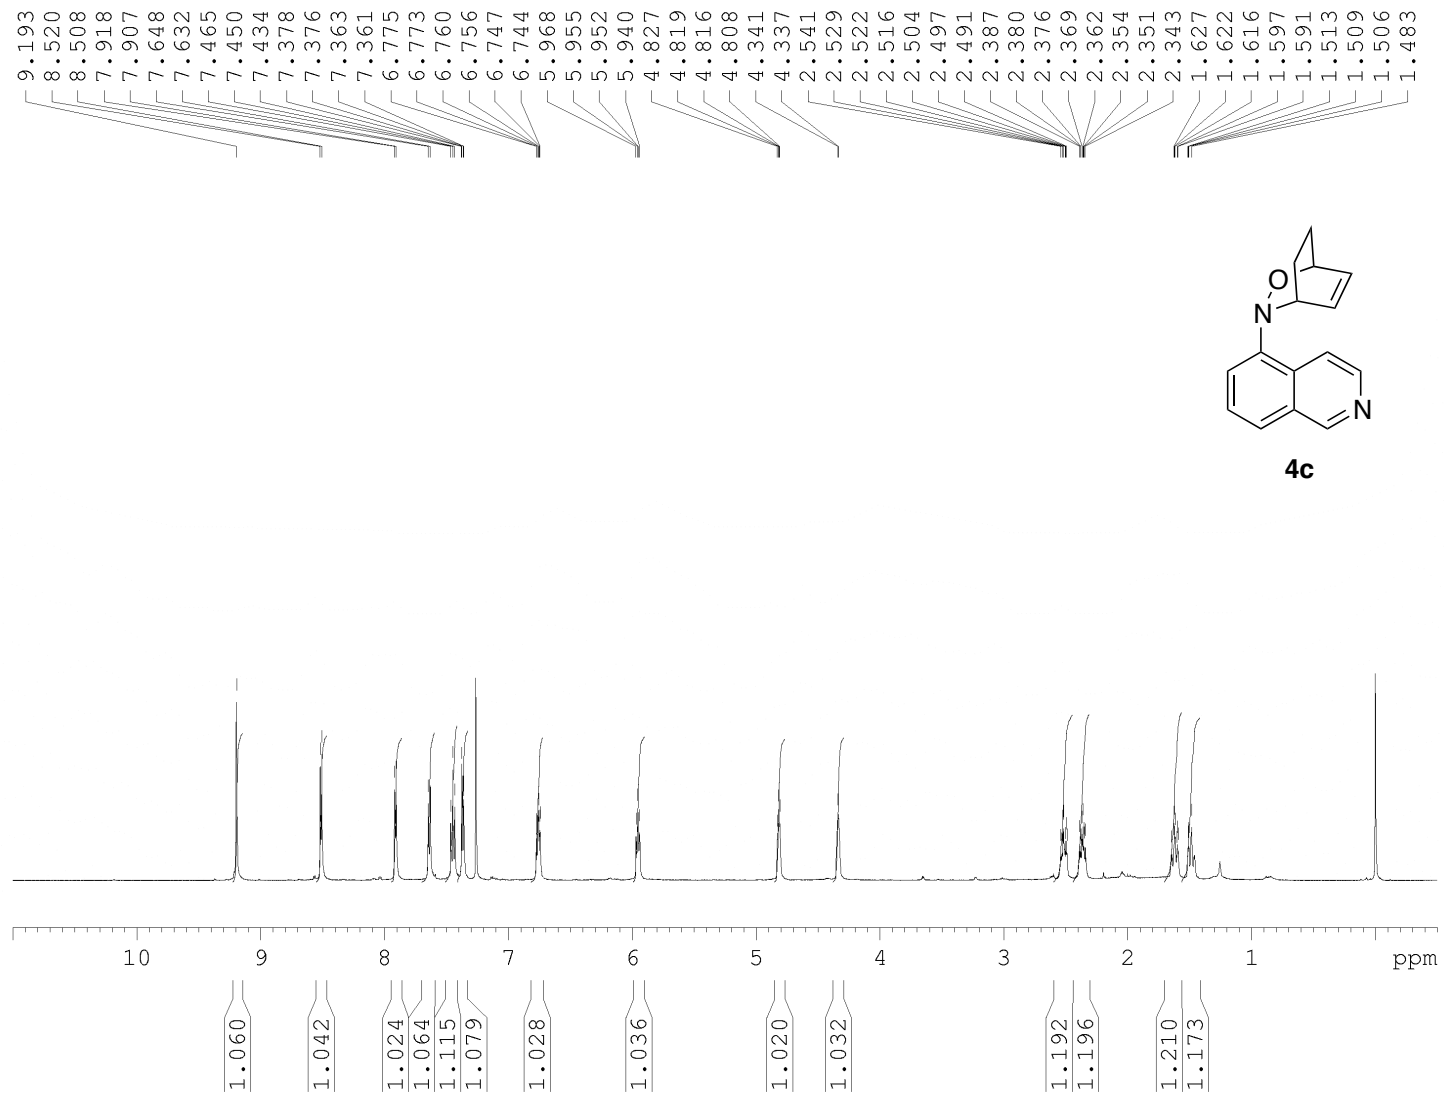

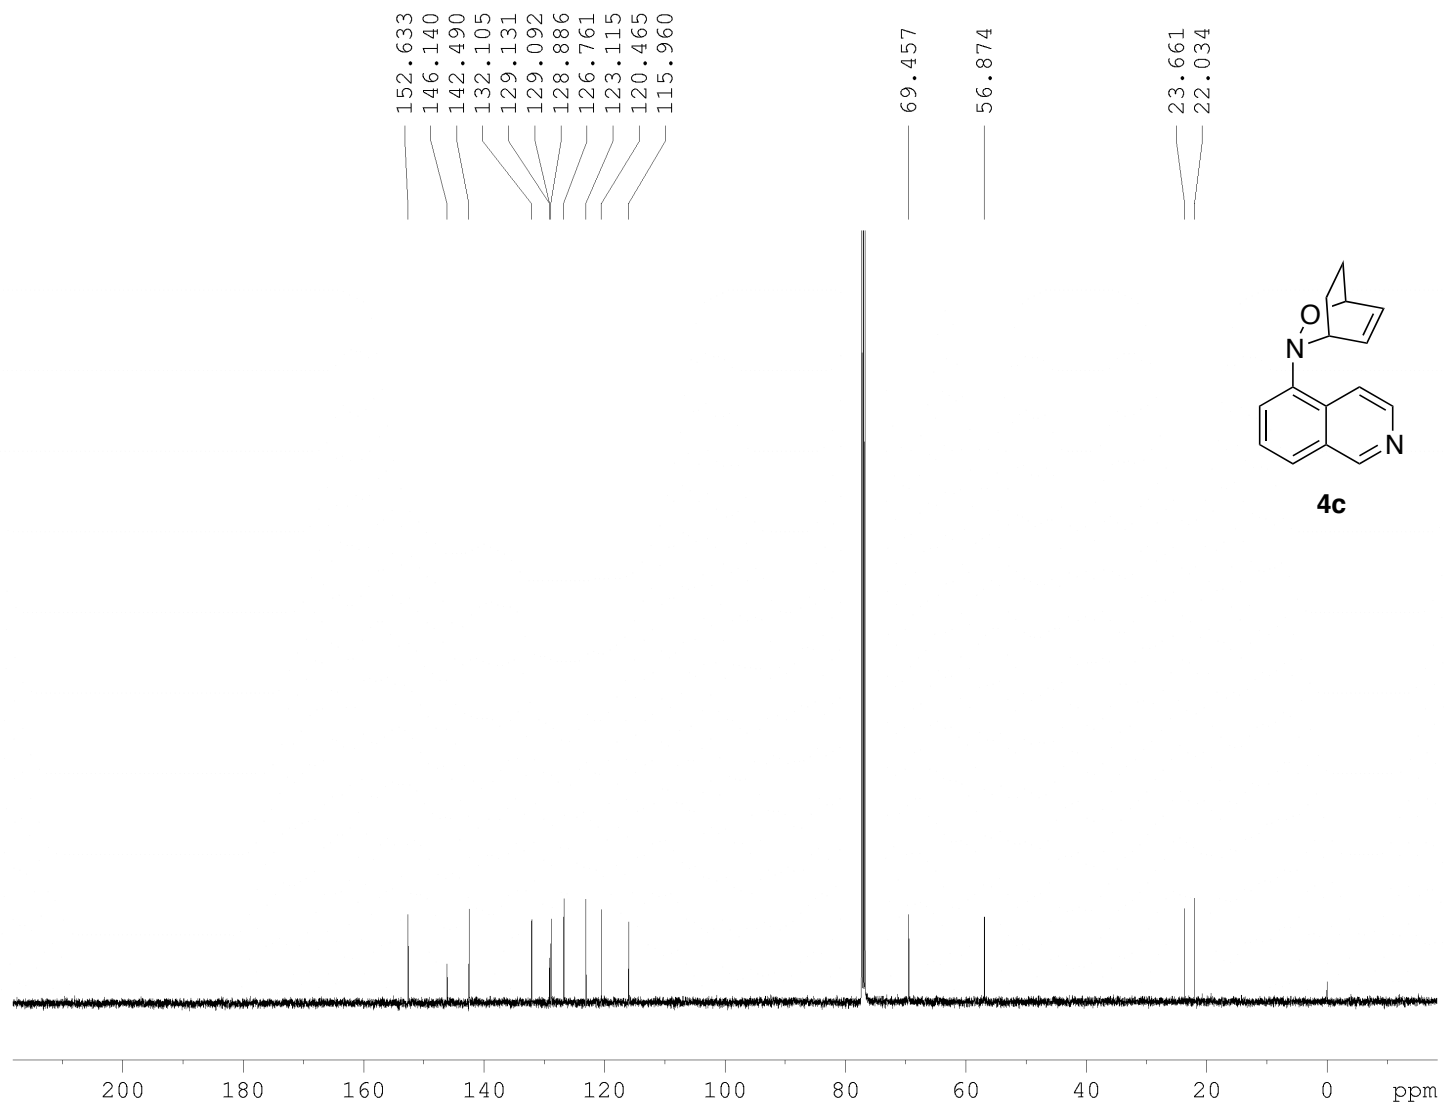

<sup>13</sup>C NMR (128.5 MHz, CDCl<sub>3</sub>) Spectrum of 3-(isoquinolin-5-yl)-2-oxa-3-azabicyclo[2.2.2]oct-5-ene (**4c**)

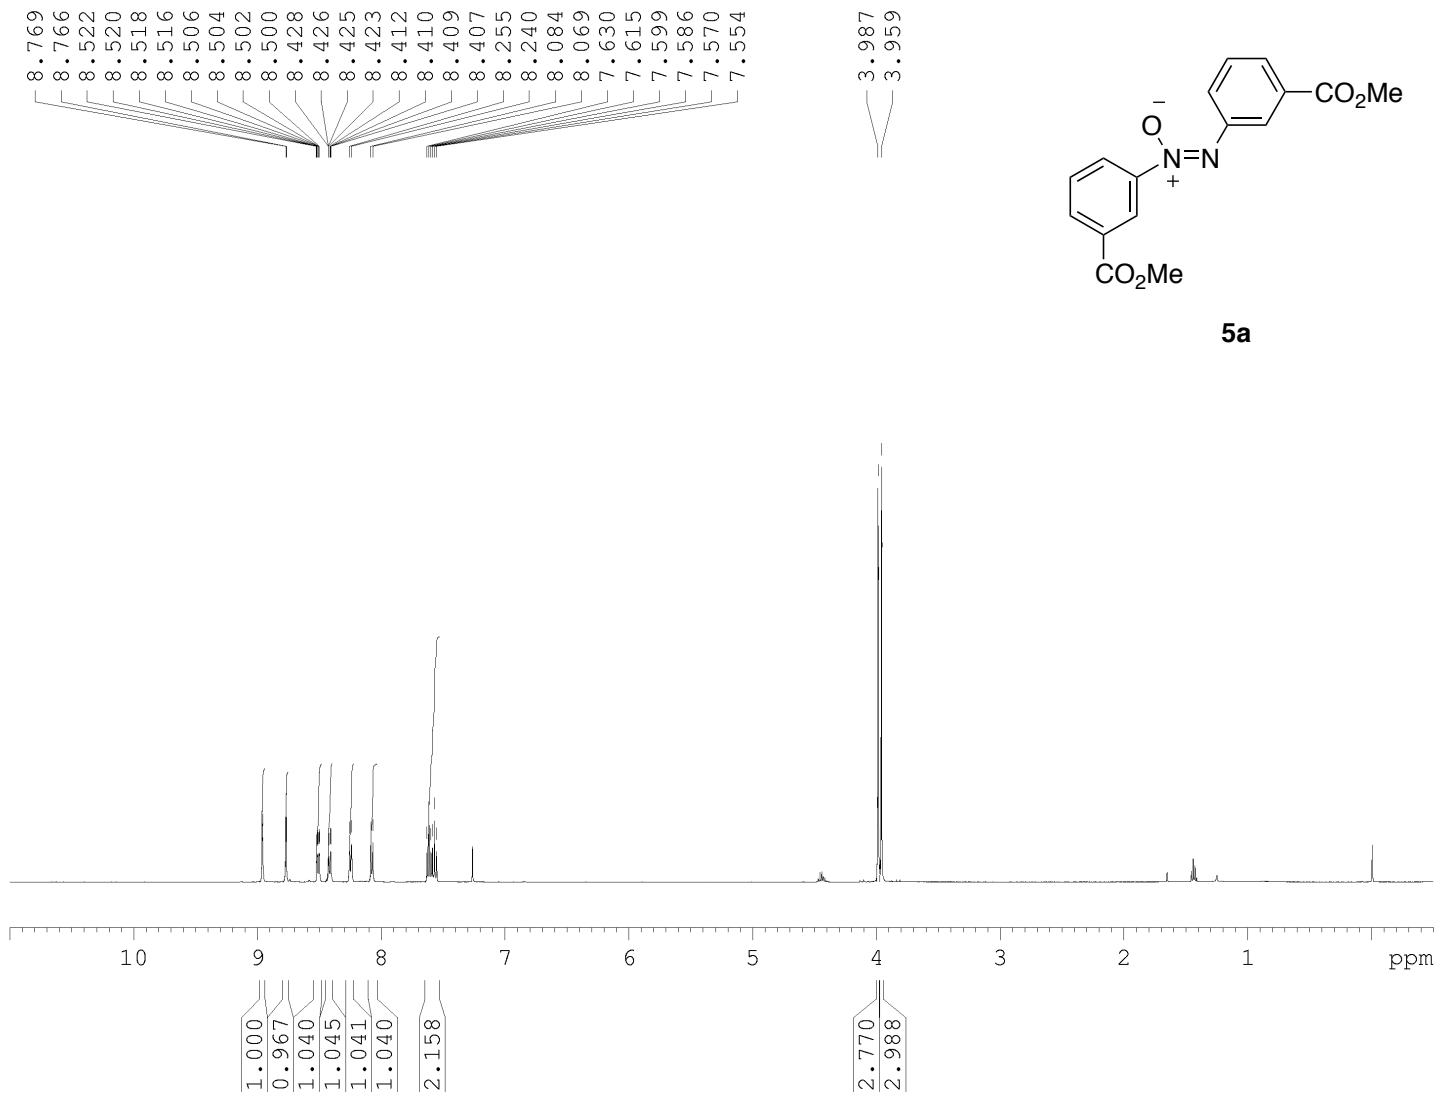

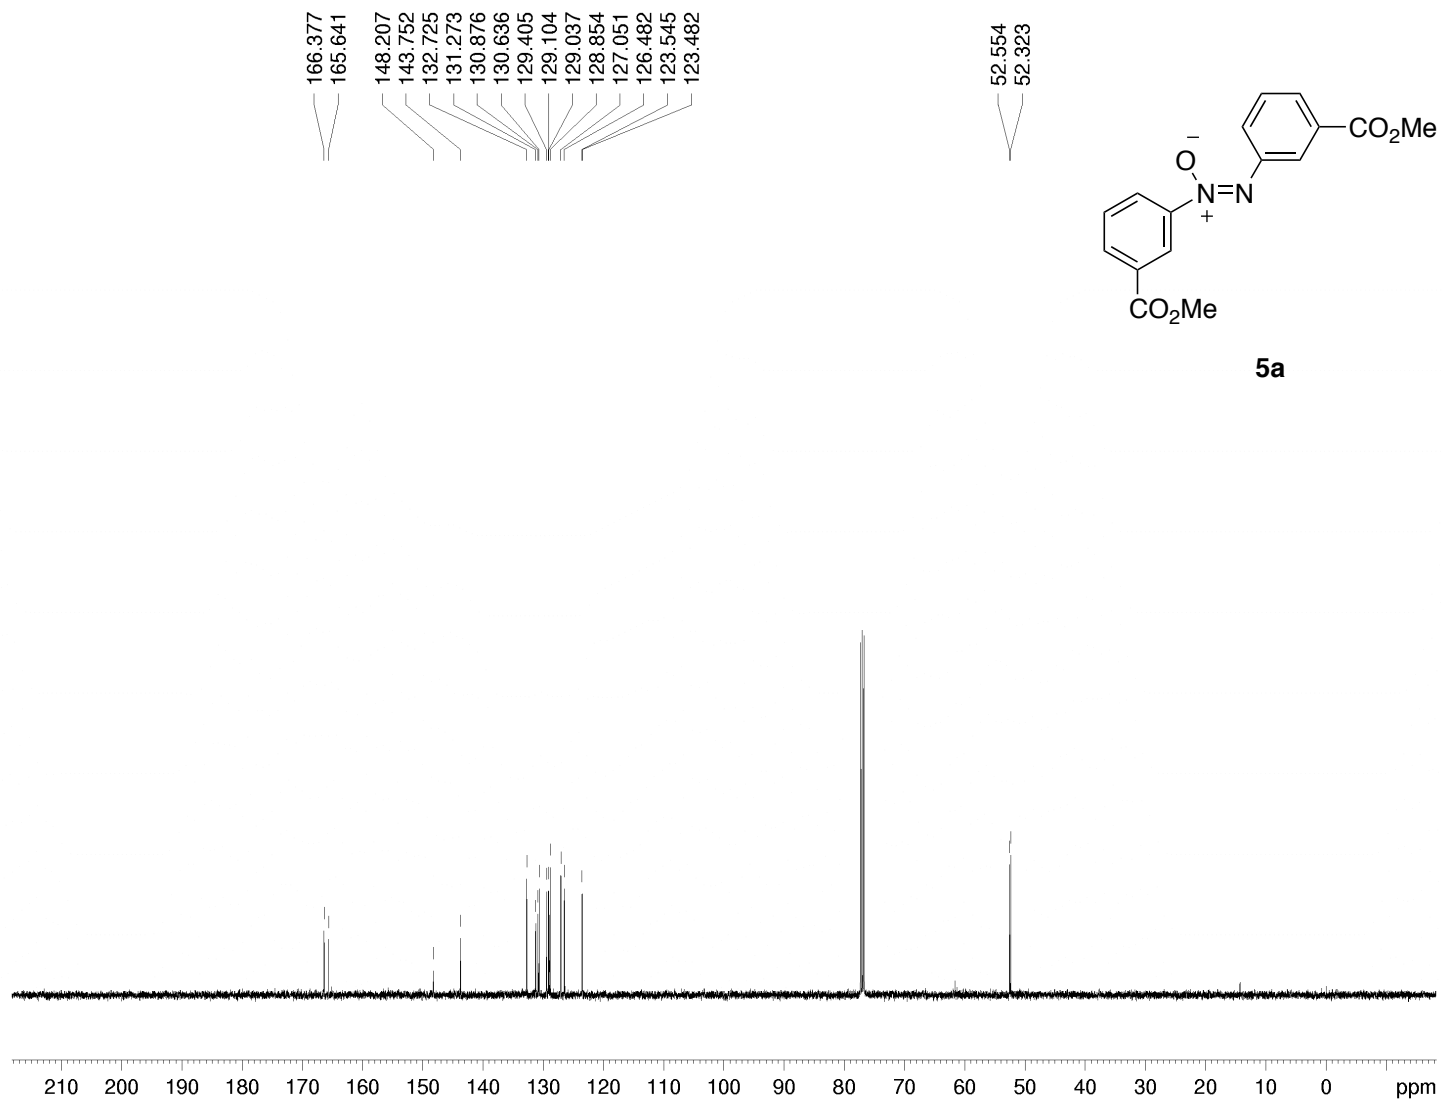

<sup>13</sup>C NMR (128.5 MHz, CDCl<sub>3</sub>) Spectrum of 1,2-bis(3-(methoxycarbonyl)phenyl)diazene oxide (5a)

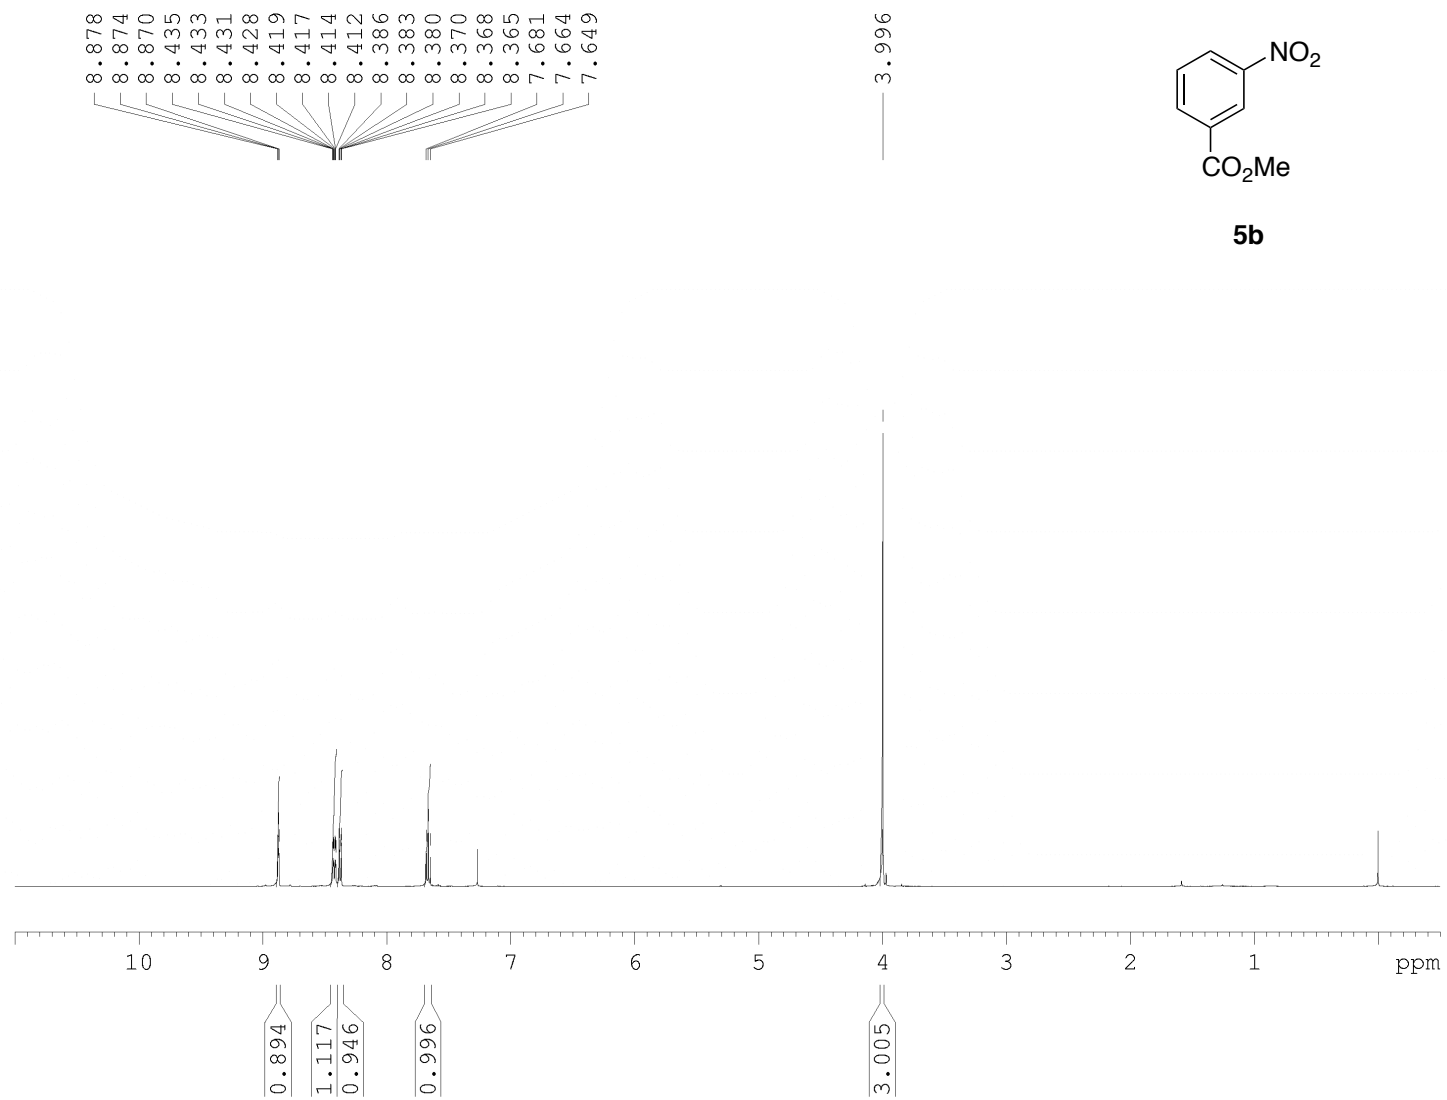

<sup>1</sup>H NMR (500 MHz, CDCl<sub>3</sub>) Spectrum of methyl 3-nitrobenzoate (5b)

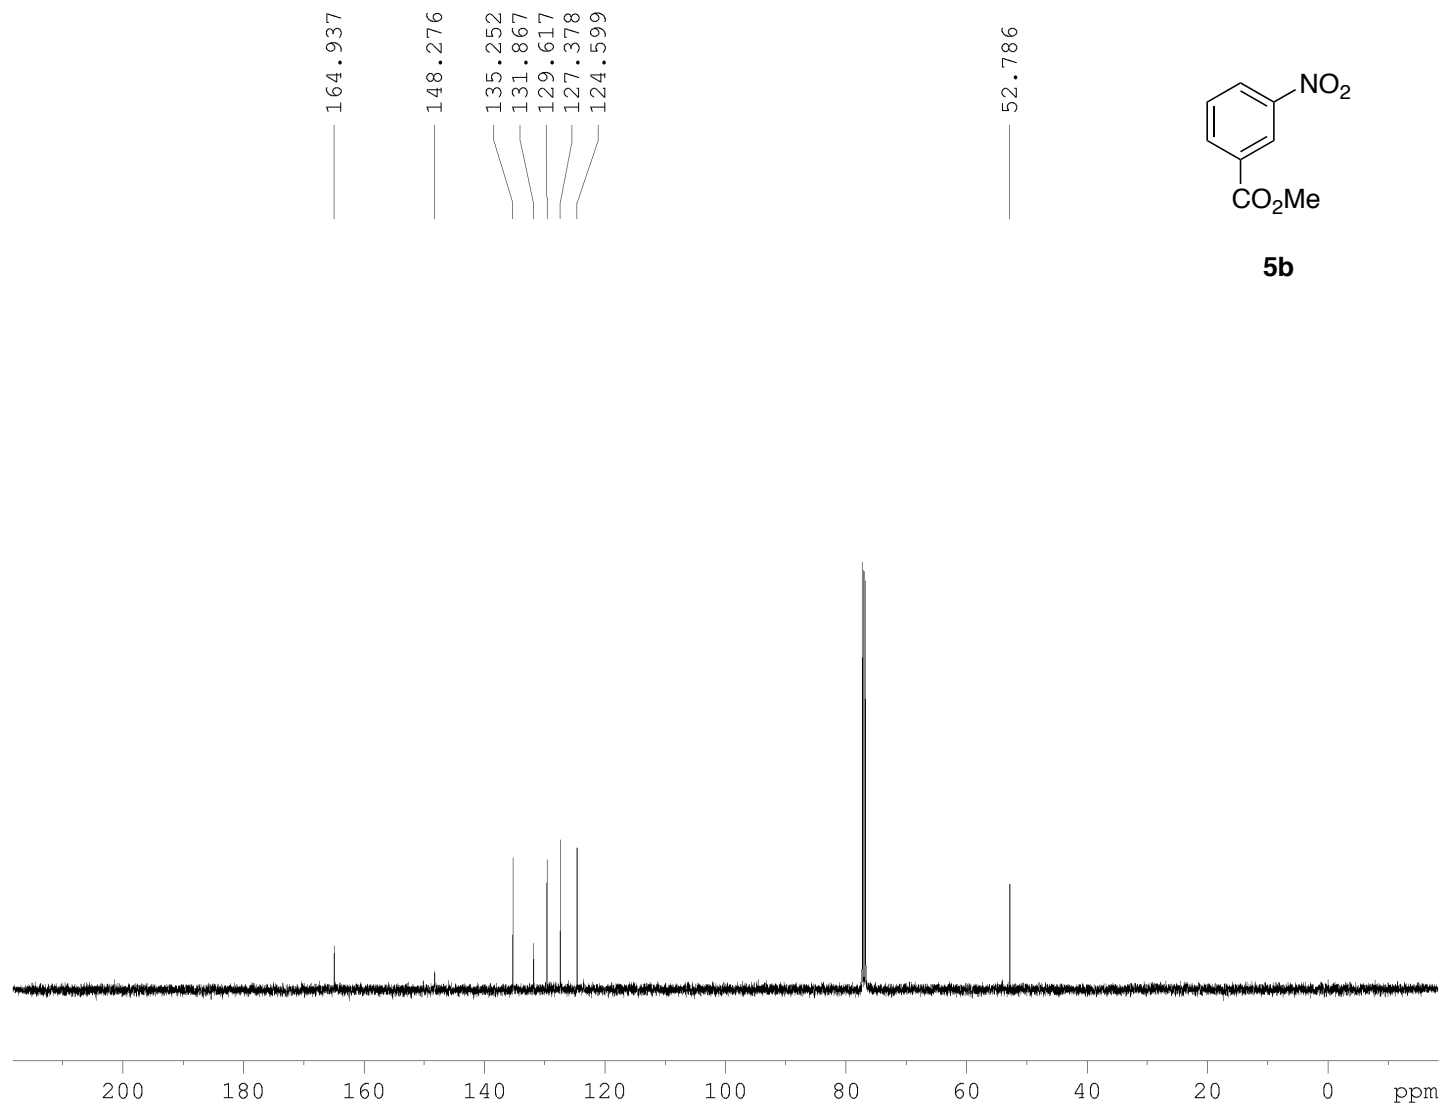

$^{13}\text{C}$  NMR (128.5 MHz,  $\text{CDCl}_3$ ) Spectrum of methyl 3-nitrobenzoate (5b)

7.429  
7.427  
7.424  
7.414  
7.412  
7.409  
7.352  
7.348  
7.344  
7.222  
7.207  
7.191  
6.863  
6.861  
6.858  
6.857  
6.847  
6.846  
6.842  
6.841

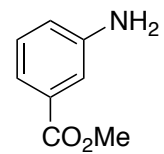

**5c**

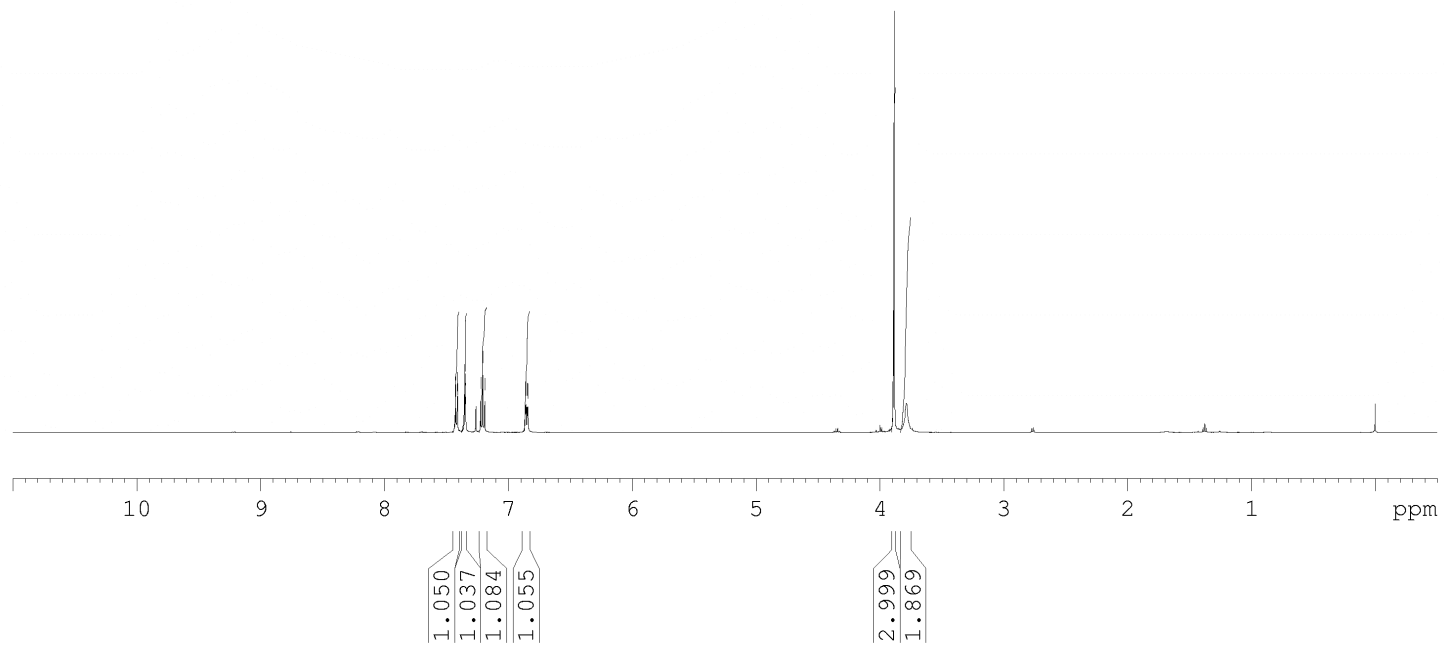

<sup>1</sup>H NMR (500 MHz, CDCl<sub>3</sub>) Spectrum of methyl 3-aminobenzoate (5c)



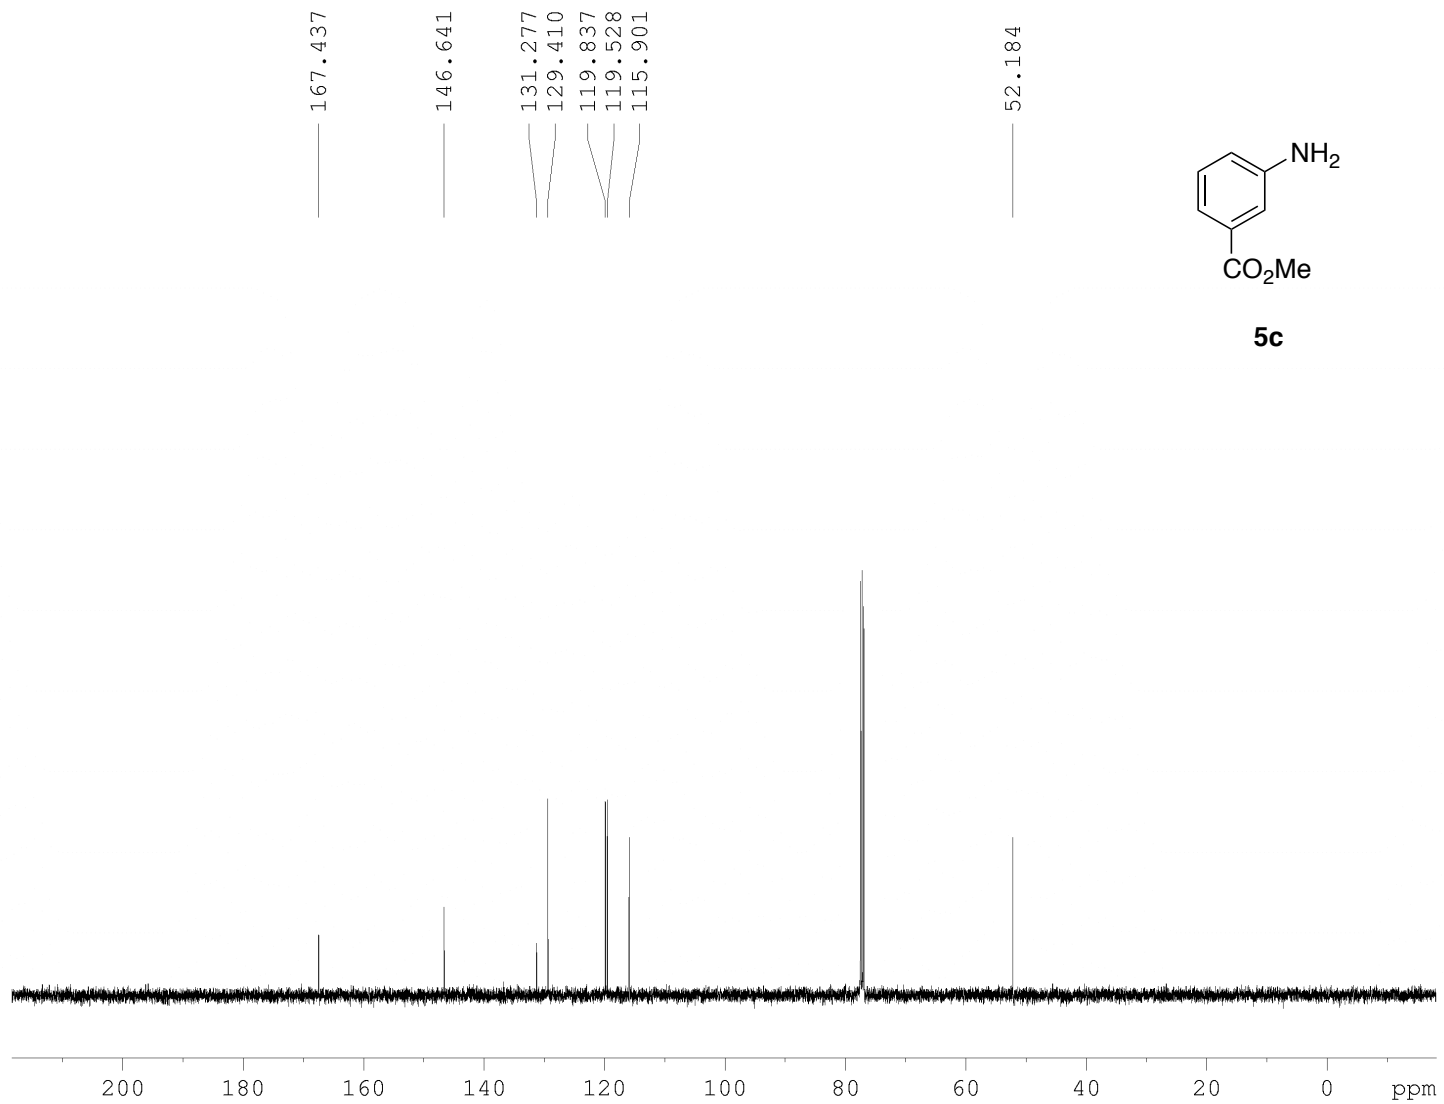

<sup>13</sup>C NMR (128.5 MHz, CDCl<sub>3</sub>) Spectrum of methyl 3-aminobenzoate (5c)

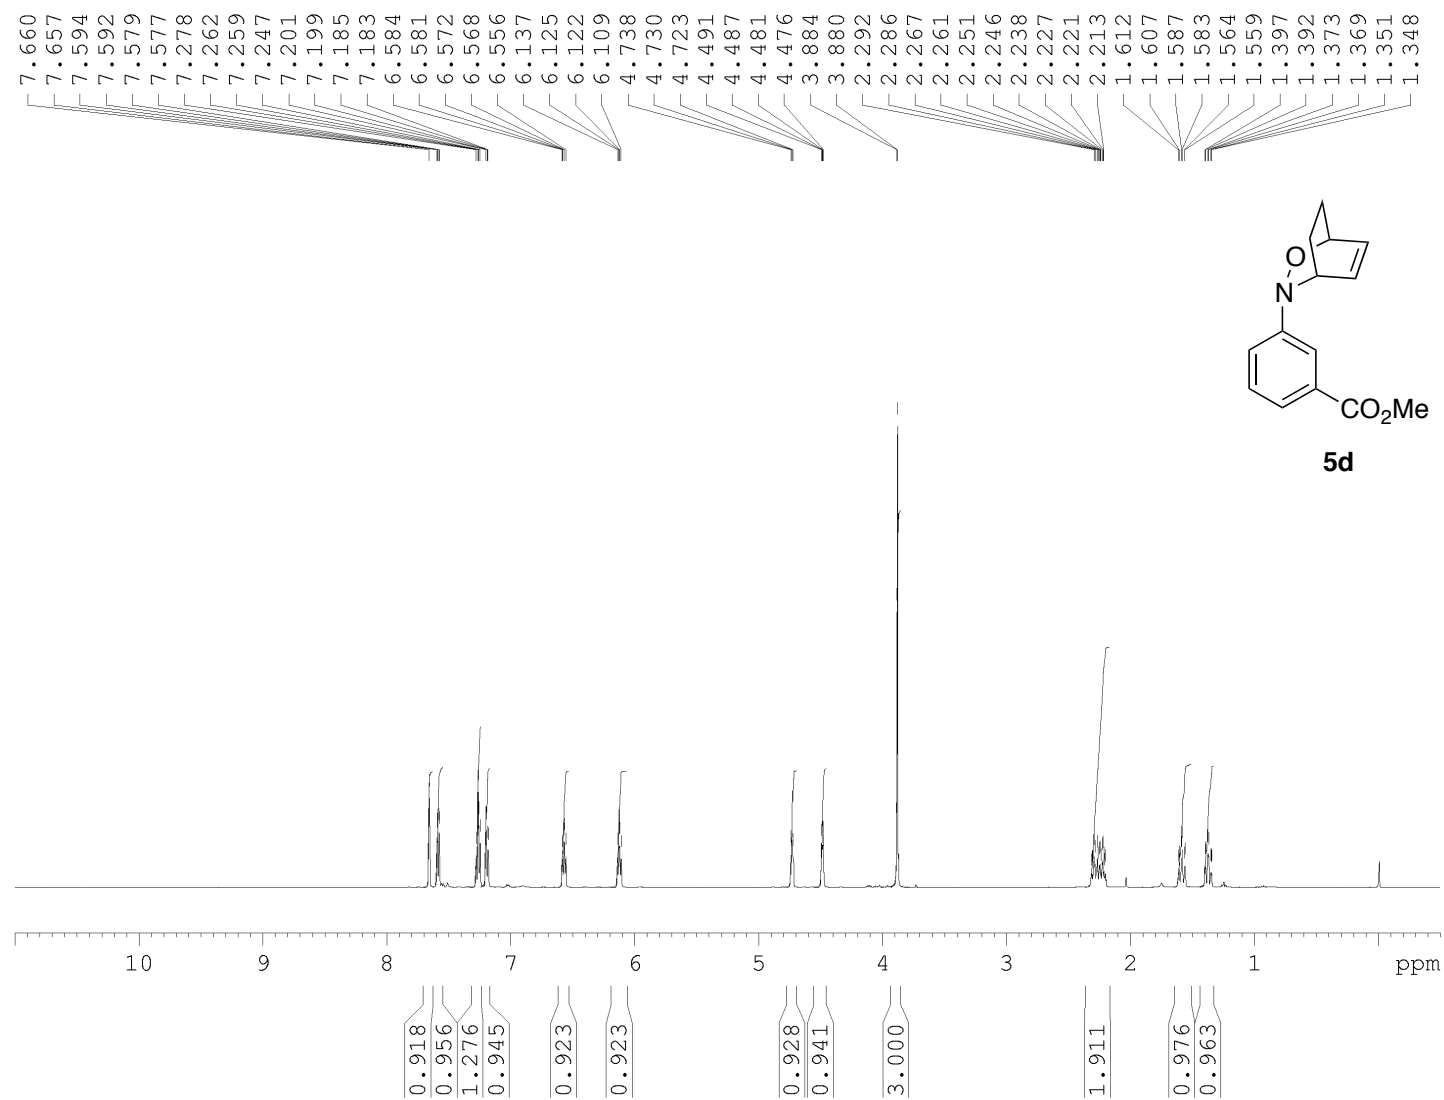

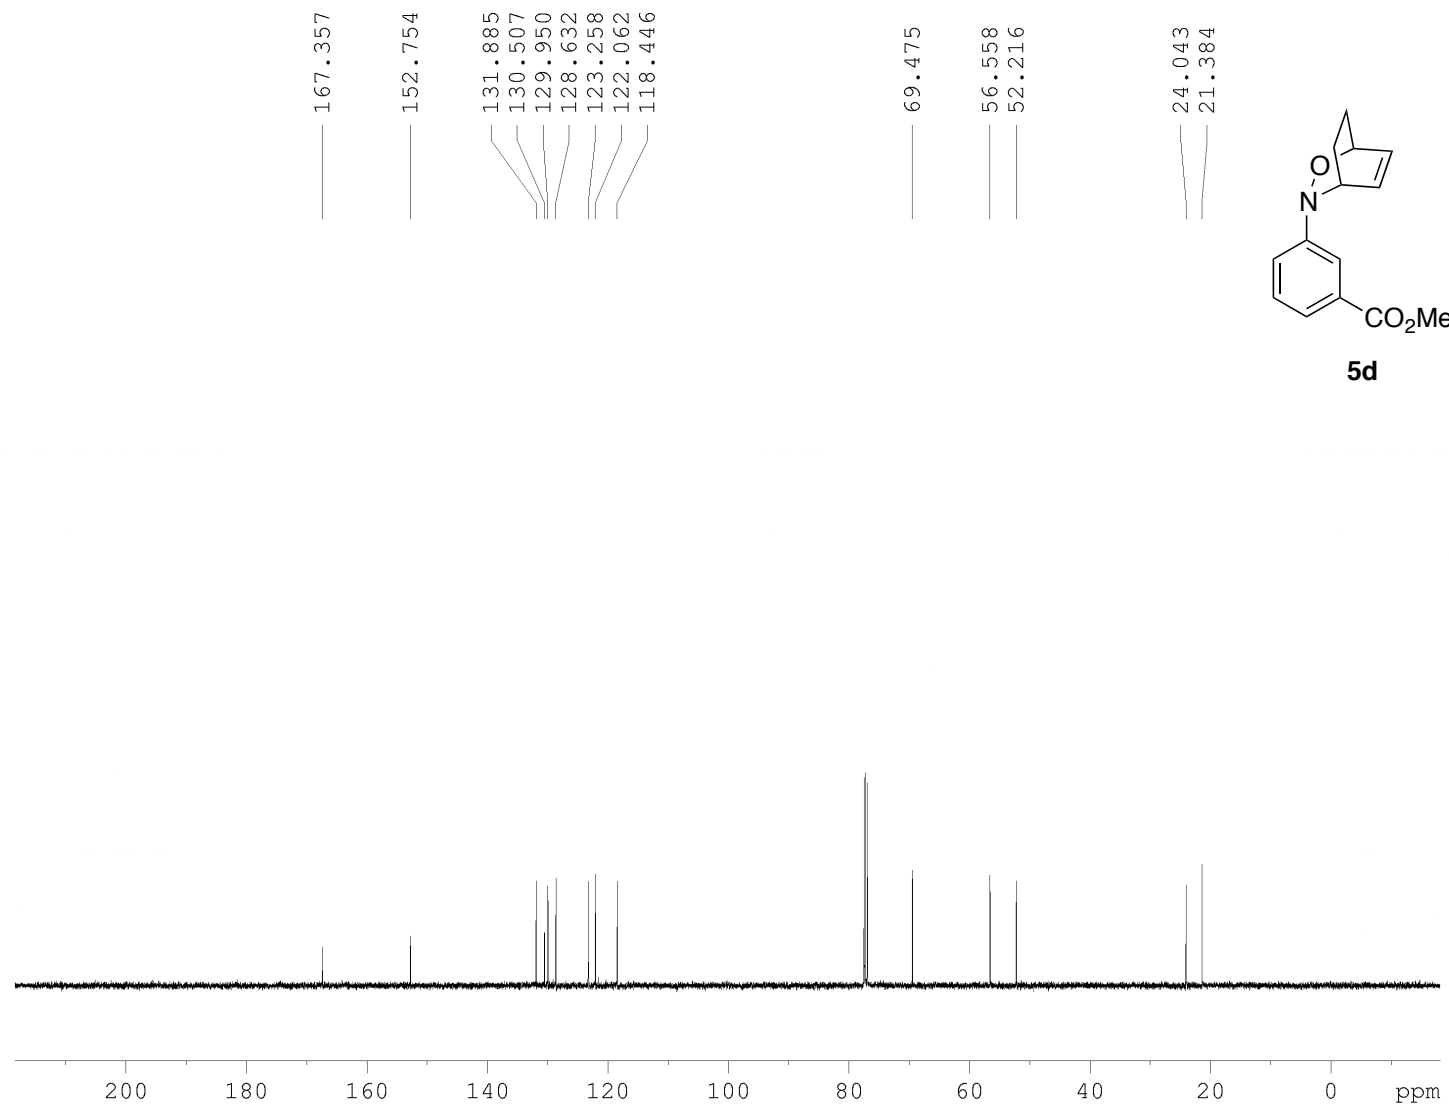

<sup>13</sup>C NMR (128.5 MHz, CDCl<sub>3</sub>) Spectrum of methyl 3-(2-oxa-3-azabicyclo[2.2.2]oct-5-en-3-yl)benzoate (5d)
